1 **Reconstitution of Alveolar Regeneration via novel DATPs by Inflammatory Niches**

2

3 Jinwook Choi<sup>1</sup>, Jong-Eun Park<sup>2</sup>, Georgia Tsagkogeorga<sup>3, 4</sup>, Motoko Yanagita<sup>5</sup>, Bon-Kyoung  
4 Koo<sup>6</sup>, Namshik Han<sup>3</sup>, and Joo-Hyeon Lee<sup>1, 7</sup>

5

6 <sup>1</sup>Wellcome-MRC Cambridge Stem Cell Institute, University of Cambridge, Cambridge, UK

7 <sup>2</sup>Wellcome Sanger institute, Cambridge, UK

8 <sup>3</sup>Milner Therapeutics Institute, University of Cambridge, Cambridge, UK

9 <sup>4</sup>STORM Therapeutics Ltd., Cambridge, UK

10 <sup>5</sup>Department of Nephrology, Kyoto University Graduate School of Medicine, Kyoto, Japan

11 <sup>6</sup>Institute of Molecular Biotechnology of the Austrian Academy of Science (IMBA), Vienna,  
12 Austria

13 <sup>7</sup>Department of Physiology, Development and Neurobiology, University of Cambridge,  
14 Cambridge, UK

15

16

17

18 Correspondence contact:

19 Joo-Hyeon Lee, [jhl62@cam.ac.uk](mailto:jhl62@cam.ac.uk)

20

21

22

23

1 **Summary**

2 Tissue regeneration involves a multi-step process composed of diverse cellular hierarchies and  
3 states that are also implicated in tissue dysfunction and pathogenesis. Here, we leveraged  
4 single-cell RNA sequencing analysis in combination with *in vivo* lineage tracing and organoid  
5 models to fine-map trajectories of alveolar lineage cells during injury repair and regeneration.  
6 We identified Damage-Associated Transient Progenitors (DATPs) as a distinct AT2-lineaged  
7 population arising during alveolar regeneration. Specifically, we found that IL-1 $\beta$ , secreted by  
8 interstitial macrophages, primes a subset of *Il1r1*<sup>+</sup>AT2 cells for conversion into DATPs, via a  
9 *Hif1a*-mediated glycolysis pathway, that are functional mediators for mature AT1 cell  
10 differentiation. Importantly, we show that chronic inflammation mediated by IL-1 $\beta$  prevents  
11 differentiation into AT1 cells, leading to aberrant accumulation of DATPs and impaired  
12 alveolar differentiation. Our step-wise fine-mapping of cell fate transitions demonstrates how  
13 the inflammatory niche impedes alveolar regeneration by directing stem cell fate behavior.

14

15 **Key words**

16 Lung stem cells

17 Regeneration

18 Lineage differentiation

19 Inflammation

20 Stem cell niche

21 IL1R1 and IL-1 $\beta$

22 Damage-associated transient progenitors

23 Stem cell fate

24

25 **Running Title**

26 The Inflammatory Niche Directs Alveolar Regeneration during injury repair

27

28

29

## 1 **Introduction**

2 Maintenance of tissue homeostasis and repair following injury relies on the function of adult  
3 stem cells (Hogan et al., 2014; Li and Clevers, 2010; Wagers and Weissman, 2004). In the lung,  
4 barrier integrity of the epithelium is essential for protection against infection and efficient gas  
5 exchange. Lung tissue shows a slow cell turnover at steady state, but harbors regional-specific  
6 stem cells that quickly mobilize after tissue injury to replenish the epithelium (Hogan et al.,  
7 2014). In the alveoli, alveolar type 2 (AT2) cells maintain lung homeostasis and enable  
8 regeneration after injury by proliferating and differentiating into new alveolar type 1 (AT1)  
9 cells specialized for gas exchange (Adamson and Bowden, 1974; Barkauskas et al., 2013; Rock  
10 et al., 2011). Given the importance of AT2 cells, their self-renewal and differentiation must be  
11 tightly coordinated to maintain tissue integrity and efficient repair. Disruption of this balance  
12 can lead to life-threatening lung diseases (Hogan et al., 2014; Kotton and Morrissey, 2014).  
13 Recent studies have begun to suggest signaling pathways involved in the regulation of  
14 proliferation and differentiation of AT2 cells (Finn et al., 2019; Riemondy et al., 2019).  
15 However, it remains unclear which factors driven by injury trigger the activation of quiescent  
16 AT2 cells to differentiate towards AT1 cell fate and which differentiation trajectory they follow  
17 during lung regeneration.

18  
19 Tissue repair is a complex process that involves dynamic crosstalk between stem cells and their  
20 respective niches. Physiological insults, such as a viral infection, are well known to instigate  
21 inflammation by triggering the activation or recruitment of immune cells to the affected tissue  
22 site (Medzhitov, 2008). In solid tissues, diverse immune cells of innate or adaptive immunity  
23 are even integral components of the niche, where they contribute to immune defence against  
24 infection and can sense environmental stimuli (Naik et al., 2018). Beyond the ability to clear  
25 pathogens, recent studies highlight how restoration of barrier integrity in epithelial organs such  
26 as the skin, gut, and lung after destruction is critically dependent on the immune system (Hsu  
27 et al., 2014; Klose and Artis, 2016; Lindemans et al., 2015; Naik et al., 2017). Lung epithelium  
28 is especially vulnerable to injury, as its surface is exposed to the external environment. In line  
29 with this, immune cells have been reported to be involved in lung homeostasis and restoration  
30 (Chen et al., 2012; Lechner et al., 2017; Westphalen et al., 2014). Recent advances have  
31 increased our insight into the critical role of paracrine niche-generated signals as key  
32 modulators of stem cell behaviors. In the distal lung, Pdgfra<sup>+</sup> mesenchymal cells and vascular  
33 endothelial cells were identified as supportive niche cells (Barkauskas et al., 2013; Lee et al.,  
34 2014). More recently, mesenchymal cell subtypes including Wnt-responding and Wnt-

1 producing fibroblasts were suggested to regulate stem cell properties and the cellular identity  
2 of AT2 cells (Lee et al., 2017; Nabhan et al., 2018; Zepp et al., 2017). However, our knowledge  
3 about the specific crosstalk between inflammatory cells and AT2 cells in regeneration remains  
4 limited. In particular, a fundamental question yet to be investigated is how the chronic  
5 inflammation impacts on tissue destruction, as it is likely caused by impaired stem cell function  
6 or regeneration process after injury, both processes that are poorly understood.

7  
8 Here we set out to identify the lineage trajectory from AT2 toward AT1 cells during alveolar  
9 regeneration after injury. Single cell RNA-sequencing (scRNA-seq) analysis of *in vivo* AT2  
10 lineage-labeled cells and *ex vivo* AT2 cell-derived organoids allowed us to delineate a precise  
11 differentiation trajectory in which AT2 cells adopt a ‘priming’ state followed by transition into  
12 ‘Damage-Associated Transition Progenitors (DATPs)’ prior to conversion into terminally  
13 differentiated AT1 cells. Importantly, we demonstrate that inflammatory niches driven by IL-  
14  $1\beta$  and Hif1a signaling pathways orchestrate the regeneration process by triggering state-  
15 specific differentiation programs of AT2-lineage cells. Overall, our study reveals essential  
16 functions of inflammation in alveolar regeneration, providing new insights into how chronic  
17 inflammation impairs tissue restoration and leads to lung diseases.

## 18 19 **Results**

### 20 21 **Reprogramming of AT2 cells during alveolar regeneration after tissue injury**

22 To define molecular identities and states of AT2 lineage cells responding to injury and  
23 undergoing regeneration, we treated AT2 reporter mice (*SPC-Cre<sup>ERT2</sup>;R26R<sup>tdTomato</sup>*) with  
24 tamoxifen, exposed them to PBS (control, homeostasis) or bleomycin (injury), and isolated  
25 lineage-labeled cells for scRNA-seq analysis at day 14 (acute injury) or 28 (resolution of injury)  
26 (Fig. 1A and Fig. S1A). Based on the expression of canonical AT1 and AT2 cell markers, we  
27 uncovered five distinct cell populations (Fig. 1B and Fig. S1B). Distribution of each cluster  
28 across time points allowed us to assess how AT2 cells changed during injury response and  
29 repair (Fig. 1C).

30 As expected, lineage-labeled cells in uninjured mice, comprised mainly of AT2 cells  
31 (cluster 1) expressing canonical AT2 markers such as surfactant proteins (*Sftpc*, *Sftpa1*) (Fig. 1,  
32 C and D). At day 14 post injury, three additional distinct populations had emerged while this  
33 AT2 cluster had become dramatically reduced (Fig. 1, C and D). Approximately 6% of lineage-  
34 labeled cells expressed proliferation/cell-cycle markers such as *Cdk1*, *Mki67*, and *Cenpa*,

1 corresponding to Cycling AT2 cells (cAT2, cluster 3) (Fig. 1D and Fig. S1C). A second AT2-  
2 like state was highly prominent at this stage (cluster 2). This cluster showed similar expression  
3 levels of canonical AT2 markers including *Sftpc* but lower expression of genes that are  
4 involved in the lipid metabolism shown in homeostatic AT2 cells (hAT2, cluster 1) such as  
5 *Acly*, *Hmgcr*, and *Hmgcs1* (Fig. 1D and Fig. S1C). We also found enriched expression of genes  
6 induced by an inflammatory response such as *Ptges*, *Lcn1*, *Orm1*, *Tmem173*, and *Ifitm2/3* in  
7 this cluster (Fig. 1D and Fig. S1C) (Fortier et al., 2008; Kuriakose and Kanneganti, 2018;  
8 Ligresti et al., 2012). Remarkably, essential regulators for AT2 lineage specification such as  
9 *Etv5*, *Abca3*, and *Cebpa* were also downregulated, suggesting that this population had lost AT2  
10 identity (Fig. 1D and Fig. S1C) (Martis et al., 2006; Rindler et al., 2017; Zhang et al., 2017),  
11 suggesting ‘primed AT2 state (pAT2)’. In addition, cluster 2 cells had a transcriptional  
12 signature similar to that of cAT2 cells with the exception of cell cycle-related genes. We also  
13 identified an uncharacterized cellular subset of cluster 4 which we named ‘Damage-Associated  
14 Transient Progenitors (DATPs)’. DATPs expressed specific markers such as *Cldn4*, *Krt8*,  
15 *Ndrgr1*, *Sprr1a*, and *AW112010* (Fig. 1D and Fig. S1C). Overall, DATPs shared features of the  
16 AT1 lineage transcription signature, but showed much lower expression of canonical AT1  
17 markers including *Pdpr*, *Hopx*, and *Cav-1* (Fig. 1D and Fig. S1C). Analysis of Gene Ontology  
18 (GO) terms further revealed that DATPs were characterized by increased expression of genes  
19 associated with p53 signaling (e.g. *Trp53*, *Mdm2*, *Ccnd1*, *Gdf15*), inhibition of proliferation  
20 (e.g. *Cdkn1a*, *Cdkn2a*), hypoxia (*Hif1a*, *Ndrgr1*), and the interferon-gamma signaling pathway  
21 (e.g. *Ifngr1*, *Ly6a/Sca-1*, *Irf7*, *Cxcl16*) (Fig. S1D).

22 As expected, at day 28 post-injury, we observed substantial increases in the mature AT1  
23 and hAT2 populations while cAT2, pAT2, and DATPs were diminished, reflecting return to  
24 alveolar homeostasis after injury (Fig. 1C). To better understand the differentiation paths of  
25 AT2 cells to AT1 cells during regeneration, we applied partition-based graph abstraction  
26 (PAGA, Fig. 1E) and characterized transcriptional programs ordered along pseudotemporal  
27 trajectories (Fig. 1F) (Wolf et al., 2019). PAGA shows that AT2 and AT1 cells are connected  
28 via a trajectory that includes pAT2 cells and DATPs (Fig. 1E). cAT2 cells were assigned as  
29 the population most close to pAT2 cells, suggesting that priming of naïve AT2 cells prior to  
30 initiation of differentiation is closely related with a cell cycle event. After excluding cAT2 cells,  
31 pseudotime analysis showed that AT2 transitions into AT1 cells via pAT2 cells and DATPs,  
32 similar to that what we observed in PAGA (Fig. 1F) (Haghverdi et al., 2016). Taken together,  
33 these findings revealed a differentiation trajectory towards AT1 cell fate acquisition that passes  
34 through distinct pAT2 and DATP cell states during regeneration.

## 1 **IL-1 $\beta$ secreted from interstitial macrophages triggers reprogramming of AT2 cells**

2 Given our data showing increased expression of genes associated with the immune response  
3 signatures in pAT2 cells, we next asked whether bleomycin injury resulted in inflammation  
4 (Fig. S2A). By flow cytometry analysis, we found dynamic changes in macrophage behaviors  
5 across injury response and regeneration. At day 7 post injury, the number and frequency of  
6 interstitial macrophages (IMs) were significantly increased, whereas the number and frequency  
7 of alveolar macrophages (AMs) were decreased (Fig. S2, B-D). These changes were restored  
8 to homeostatic levels by day 28, indicating resolution of acute inflammation. Because  
9 macrophages localized near AT2 lineage-labeled cells during acute injury (Fig. S2E), we  
10 hypothesized that macrophages may affect the behavior of lineage-labeled cells in response to  
11 injury. Importantly, we observed that 3D organoid co-cultures in which AT2 cells were  
12 cultured together with IMs in the presence of stromal cells revealed more and larger organoid  
13 formation than when they were co-cultured with AMs (Fig. 2A-C) (Lee et al., 2014). To further  
14 address the contribution of macrophages in alveolar regeneration after injury, we analyzed  
15 scRNA-seq of non-lineage-labeled cells from *SPC-Cre<sup>ERT2</sup>;R26R<sup>tdTomato</sup>* mice, including  
16 immune cells, isolated in parallel with samples (PBS, D14 and D28) in Fig. 1 (Fig. S2, F-H).  
17 The expression level of *IL-1 $\beta$* , which is specifically detected in macrophages, was increased at  
18 day 14 post injury and decreased to homeostatic levels at day 28 (Fig. S2, H and I). Quantitative  
19 PCR (qPCR) analysis on isolated AMs and IMs from uninjured lungs revealed that *IL-1 $\beta$*  is  
20 highly and specifically expressed in IMs while *IL-18* is enriched in AMs, consistent with  
21 previous reports (Fig. S2J) (Misharin et al., 2017). Furthermore, GM-CSF activation  
22 specifically augmented *IL-1 $\beta$*  expression in IMs but did not affect *IL-18* expression in AMs  
23 (Fig. S2J). Notably, bleomycin injury stimulated *IL-1 $\beta$*  expression in IMs *in vivo* (Fig. S2K).  
24 IL-1 $\beta$  treatment was also sufficient to increase the number and size of organoids formed by  
25 AT2 cells (Fig. 2, D and E).

26 To further ask how IL-1 $\beta$  affects the cellular and molecular behaviors of AT2 cells, we  
27 performed scRNA-seq of control and IL-1 $\beta$ -treated organoids. Based on the marker gene  
28 expression, we identified five distinctive clusters (AT2, pAT2, cAT2, DATPs, and AT1 cells)  
29 similar to those we had seen in AT2 lineage-labeled cells (Fig. 2F and Fig. S3, A-C). In control  
30 organoids, most cell types corresponded to AT2 and AT1 cells alongside smaller pAT2 and  
31 DATPs clusters (Fig. 2G). In contrast, IL-1 $\beta$ -treatment increased the pAT2 fraction to ~77%  
32 of pAT2 cells, classified by low expression of genes, such as *Etv5*, *Abca3*, and *Cebpa*,  
33 suggesting that IL-1 $\beta$  triggers AT2 cells to enter a primed state (Fig. 2G). The DATP

1 population was also increased by IL-1 $\beta$  treatment (Fig. 2G). Pseudotime and PAGA analysis  
2 of the scRNA-seq data showed that IL-1 $\beta$ -treated organoids skew differentiation of AT2 cells  
3 towards AT1 fate (Fig. 2H and Fig. S3D), by enhancing differentiation into pAT2 and DATP  
4 states similar to those of regenerating AT2 cells *in vivo* (Fig. S3, E and F). To investigate if IL-  
5 1 $\beta$  directly influences AT2 cell fate transitions, we examined cellular states at day 6 and 14,  
6 two key differentiation time points across organoid formation. At day 6, qPCR analysis of IL-  
7 1 $\beta$ -treated organoids showed an enriched transcriptional signature of pAT2-state relative to  
8 control organoids (Fig. 2I). In addition, day 14 immunostaining and flow cytometry analysis  
9 for DATP markers, such as Krt8 and Cldn4, confirmed that DATPs were significantly  
10 increased in IL-1 $\beta$ -treated organoids (Fig. 2, J and K). These data show that IL-1 $\beta$  treatment  
11 in AT2 organoids recapitulate key aspects of *in vivo* lung regeneration. Taken together, our  
12 data demonstrate that an IL-1 $\beta$ -mediated inflammatory niche triggers AT2 mediated injury  
13 response during alveolar regeneration via proceeding differentiation programs to generate  
14 DATPs.

15

#### 16 **DATPs differentiate into AT1 and AT2 cells during alveolar regeneration after injury**

17 Our scRNA-seq analysis revealed the previously unknown AT2-lineage derived DATP  
18 population emerging during alveolar regeneration and in organoids stimulated with IL-1 $\beta$ .  
19 Using AT2 reporter mice (*SPC-Cre<sup>ERT2</sup>;R26R<sup>tdTomato</sup>*), we found that approximately 10% of  
20 AT2 lineage-labeled cells express Krt8 at 14 days after bleomycin injury, confirming that  
21 DATPs originate directly from AT2 cells (Fig. 3, A-C). Importantly, neither the AT2 marker  
22 SPC, nor the AT1 marker Pdpn were detected in this population (Fig. 3, B and D). To further  
23 assess functional contributions of DATPs to alveolar regeneration, we established lineage  
24 reporter mice for N-Myc Downstream Regulated 1 (*NdrG1*) which is uniquely expressed in  
25 DATPs during alveolar regeneration (*NdrG1-Cre<sup>ERT2</sup>;R26R<sup>tdTomato</sup>*) (Figs. 1D and 3E). We did  
26 not detect any expression of *NdrG1* in airway epithelial cells with or without injury (Fig. S4, A  
27 and B). Consistent with our scRNA-seq data, neither AT2 and AT1 cells were labeled by *NdrG1*  
28 expression in PBS control mice (Fig. 3, I and K, and Fig. S4, C-E). However, at 9 days after  
29 bleomycin injury, *NdrG1* lineage-labeled cells emerged with a majority of cells positive for  
30 Krt8 in the alveolar region (Fig. 3, F and G). At day 28, we found that approximately 30% of  
31 AT1 cells were lineage-labeled by *NdrG1* with AT1 cell morphology (Fig. 3, J and K). We also  
32 confirmed the contribution of DATPs in AT1 cell generation with lineage-tracing analysis  
33 using *Krt8* reporter mice (*Krt8-Cre<sup>ERT2</sup>;R26R<sup>tdTomato</sup>*) (Fig. S5A). Consistent with *NdrG1*



1 lineage-labeled cells, neither AT2 nor AT1 cells were labeled in uninjured lungs (Fig. S5B).  
2 *Krt8* expression was only detected in *Cldn4*<sup>+</sup> DATPs at day 9 in the alveolar region post injury,  
3 but was then prominent in *Pdpn*<sup>+</sup> AT1 cells at day 28 post injury (Fig. S5, C-F).

4 We observed that a significant number of *SPC*<sup>+</sup> AT2 cells were lineage-labeled by  
5 *Ndr1* and *Krt8* at day 28 post bleomycin injury (Fig. 3, I and J and Fig. S5, G and H). To  
6 confirm that DATPs possessed capacity of dedifferentiating into AT2 cells, we isolated AT2  
7 cells (*CD31*<sup>-</sup>*CD45*<sup>-</sup>*EpCAM*<sup>+</sup>*MHCII*<sup>+</sup>) (Hasegawa et al., 2017) from *Krt8* reporter mice and  
8 performed organoid cultures in the presence of IL-1 $\beta$  (Fig. S5I). At day 14 in culture, we added  
9 4-OH tamoxifen to label *Krt8*-expressing DATPs. Consistent with immunostaining for *Krt8* in  
10 organoids (Fig. 2J), we detected Tomato<sup>+</sup> cells (*Krt8*<sup>+</sup> DATPs) in the inner part of organoids,  
11 which segregated distinctly from Tomato<sup>-</sup>*MHCII*<sup>+</sup> AT2 cells by flow cytometric analysis (Fig.  
12 S5, J and K). Furthermore, *Krt8*<sup>+</sup> DATPs (Tomato<sup>+</sup>*MHCII*<sup>-</sup>) isolated from organoids were  
13 capable of forming organoids composed of DATPs and *SPC*<sup>+</sup> AT2 cells (Fig. S5, K-M).

14

## 15 **IL-1 $\beta$ signaling is required for cell fate conversion into DATPs during alveolar** 16 **regeneration**

17 Given that IL-1 $\beta$  treatment increased generation of DATPs in organoids, we next asked  
18 whether IL-1 $\beta$  signaling is required for differentiation into DATPs *in vivo*. To answer this  
19 question, we generated *Il1r1*<sup>fllox/fllox</sup>;*SPC-Cre*<sup>ERT2</sup>;*R26R*<sup>tdTomato</sup> mice to deplete *Il1r1*, a  
20 functional receptor for IL-1 $\beta$ , specifically in AT2 cells (Fig. 4A). The proliferative activity of  
21 *Il1r1*-deficient AT2 cells was comparable to that of *Il1r1*- haplodeficient AT2 cells post injury  
22 (Fig. S6A). As IL-1 $\beta$  treatment increased organoid size and forming efficiency (Fig. 2, D and  
23 E), we carefully examined AT2 cell proliferation by EdU incorporation assays at early time  
24 point (day 4) in organoid cultures. Although IL-1 $\beta$ -treated organoids revealed increases in EdU  
25 incorporation rates relative to control, notably, *Il1r1*-deficient AT2 cells also showed a similar  
26 rate of EdU incorporation, indicating that IL-1 $\beta$  does not directly influence on AT2 cell  
27 proliferation (Fig. S6B). Given that differential expressions of growth factors regulating AT2  
28 cell proliferation in IL-1 $\beta$ -treated stromal cells co-cultured with AT2 cells in organoids (Fig.  
29 S6, C-E), it is highly likely that IL-1 $\beta$  enhances AT2 cell proliferation via modulating  
30 surrounding cells rather than direct effects on AT2 cells.

31 We then further analyzed cAT2 subsets (derived from AT2 lineage-labeled cells post  
32 injury, Fig. 1B), which showed step-wise cell cycle transitions based on expression of cell cycle  
33 phase-specific genes (Fig. S6F). We discovered that AT2 cells acquired transcriptional



1 signatures of pAT2 cells during the transition from S to G2/M phase in the cell cycle (Fig.  
2 S6G). During this transition, the expression of naïve AT2 cell markers including *Abca3* was  
3 downregulated while the expression of genes associated with inflammatory response including  
4 *Ptges* was induced. Remarkably, *Il1r1* expression was upregulated specifically in G2/M phase  
5 (Fig. S6G). Importantly, we found that *Il1r1*-deficient AT2 cells failed to differentiate into  
6 DATPs at day 10 post injury (Fig. 4, B and C). Subsequently, lineage-labeled AT1 cells were  
7 significantly decreased at day 21 post injury, indicating impaired differentiation of AT2 cells  
8 into AT1 cells in the absence of IL-1 $\beta$  signaling (Fig. 4, D and E). Overall, these findings  
9 suggest that IL-1 $\beta$  does not directly influence proliferative properties of AT2 cells, but instead  
10 primes AT2 cells to initiate cell fate transition into DATPs during alveolar regeneration.

11

### 12 **Hif1a signaling is integral for DATP cell conversion and AT1 differentiation**

13 In our next set of experiments, we asked which downstream targets/factors driven by IL-1 $\beta$  are  
14 required for DATP differentiation. Upon further analysis of our *in vivo* and *in vitro* scRNA-  
15 seq data, we discovered a unique metabolic signature with higher expression of genes involved  
16 in glycolysis pathway such as *Pgk1*, *Pkm*, and *Slc16a3* (Fig. 4F). By measuring the  
17 extracellular acidification rate (ECAR) in organoids, we found that IL-1 $\beta$  enhanced the  
18 glycolysis metabolism (Fig. S7, A-C). IL-1 $\beta$ -treated organoids also showed higher rates of  
19 glucose uptake compared to control (Fig. S7, D and E). Notably, expression of *Hif1a*, a critical  
20 regulator for aerobic glycolysis metabolism, was enriched in DATPs (Fig. 4F) (Dang et al.,  
21 2008; Semenza, 2012). To determine whether Hif1a signaling is required for the transition into  
22 DATPs, we treated AT2 organoids with digoxin, a potent inhibitor of Hif1a activity, in the  
23 presence of IL-1 $\beta$  (Fig. 4G). At day 6 in culture, when higher gene signatures of pAT2 cells  
24 were detected, digoxin-treated organoids showed impaired generation of DATPs and AT1 cells  
25 (Fig. 4, H and I). We next deleted *Hif1a* specifically on AT2 cells using *Hif1a*<sup>flox/flox</sup>;*SPC*-  
26 *Cre*<sup>ERT2</sup>;*R26R*<sup>tdTomato</sup> mice (Fig. S8A). Consistent with our observations in organoid results,  
27 *Hif1a*-deficient AT2 cells failed to generate DATPs at day 10 post injury (Fig. S8, B and C).  
28 Similarly to *Il1r1*-deficient AT2 cells, AT2 cells lacking *Hif1a* failed to differentiate into AT1  
29 cells (Fig. S8, D and E). Taken together, these results demonstrate that IL-1 $\beta$  enhances Hif1a-  
30 mediated glycolysis metabolic changes which are integral for the transition into DATPs and  
31 subsequent differentiation into AT1 cells during injury repair.

32

## 1 ***Il1r1*<sup>+</sup>AT2 cells are functionally and epigenetically distinct subsets that generate DATPs** 2 **by IL-1 $\beta$ signals in alveolar regeneration**

3 Given the importance of IL-1 $\beta$  signaling in alveolar regeneration, we asked whether all AT2  
4 cells are equally capable of responding to IL-1 $\beta$  inflammatory signals. To answer this question,  
5 we generated *Il1r1* reporter mice (*Il1r1-Cre*<sup>ERT2</sup>;*R26R*<sup>tdTomato</sup>) and treated them with tamoxifen  
6 to lineage trace *Il1r1*-expressing cells (Fig. 5, A and B). We found that *Il1r1* was expressed in  
7 airway ciliated cells and small subsets of mesenchyme cells in uninjured lungs (Fig. 5C and  
8 Fig. S9). Although ~ 15% of AT2 cells were lineage-labeled in the uninjured lung, bleomycin  
9 injury significantly increased the population of lineage-labeled AT2 cells up to ~60% at day  
10 14 post injury (Fig. 5, C and D). *Il1r1* lineage-labeled AT2 cells were also more proliferative  
11 than unlabeled AT2 cells (Fig. 5, E and F). Approximately 80% of DATPs were lineage-labeled  
12 by *Il1r1*, suggesting that DATPs are mainly originating from *Il1r1*<sup>+</sup>AT2 cells (Fig. 5, G and  
13 H). At day 28 post injury, lineage-labeled AT1 cells were nicely observed (Fig. 5I).

14 We posited that epigenetic mechanisms might shape the active response of *Il1r1*<sup>+</sup>AT2  
15 cells and next performed ATAC-seq (Assay for Transposase-Accessible Chromatin with high-  
16 throughput sequencing). Although most gene including AT2 markers and general  
17 housekeeping genes showed similar chromatin accessibility patterns, notable differences were  
18 present in the open chromatin states in *Il1r1*<sup>+</sup>AT2 cells relative to bulk AT2 cells (Fig. 6, A  
19 and B and Fig. S10). Analysis for Gene Ontology (GO) terms distribution of highlighted genes  
20 revealed that epigenetic regulation and inflammation-associated pathways including  
21 Interleukin-1 signaling were enriched in *Il1r1*<sup>+</sup>AT2 cells (Fig. 6, C and D). Motif analysis of  
22 DNA binding-site showed that *Il1r1*<sup>+</sup>AT2-enriched chromatin contains motifs for key  
23 transcriptional factors associated with inflammation such as AP-1, CREB, NF-kB and Rorc,  
24 while shared genes were enriched in motifs for key lung development factors as Nkx2.1 and  
25 Cebp (Fig. 6E) (Martis et al., 2006; Minoos et al., 1999; Miossec and Kolls, 2012; Schonhaler  
26 et al., 2011). Taken together, these results demonstrate that *Il1r1* marks epigenetically distinct  
27 AT2 cell subtypes with capacity for rapid expansion and subsequent differentiation into AT1  
28 cells during injury response.

29

## 30 **Chronic inflammation mediated by sustained IL-1 $\beta$ levels stalls transition of DATPs into** 31 **mature AT1 cells**

32 Although expression levels of early AT1 markers such as *Lmo7*, *Pdpr*, and *Hopx* were  
33 comparable in control and IL-1 $\beta$ -treated organoids (Fig. S11A), we found that AT1-like cells

1 present in IL-1 $\beta$ -treated organoids failed to upregulate mature AT1 markers highly expressed  
2 in control AT1 cells such as *Aqp5*, *Vegfa*, *Cav-1*, and *Spock2* (Fig. S11B). Instead, AT1-like  
3 populations in IL-1 $\beta$ -treated organoids highly expressed DATP-associated genes including  
4 *Cldn4*, *AW112010*, and *Lhfp* (Fig. S11C), indicating that sustained IL-1 $\beta$  treatment in AT2  
5 organoids causes accumulation of DATPs and prevents terminally differentiation into mature  
6 AT1 cells. We then asked whether the stalled transition to mature AT1 cells could be rescued  
7 by relieving IL-1 $\beta$ -mediated inflammation. We cultured AT2 organoids with IL-1 $\beta$  for 14 days  
8 and maintained them for an additional 7 days without IL-1 $\beta$  treatment (Fig. 7A). Indeed, we  
9 found that expression of late AT1 markers became significantly upregulated upon IL-1 $\beta$   
10 withdrawal (Fig. 7B), concomitant with downregulation of DATP markers and expression of  
11 *Hif1a* and other glycolysis pathway genes (Fig. S11D). These findings prompted us ask  
12 whether inhibition of glycolysis in stalled DATPs might facilitate AT1 cell maturation. To this  
13 end, we treated AT2 organoids with IL-1 $\beta$  for 14 days and then with the glycolysis inhibitor 2-  
14 deoxyglucose (2-DG, a glucose analogue that causes hexokinase inhibition and disruption of  
15 glycolysis) in the continued presence of IL-1 $\beta$  for additional 4 days (Fig. 7C). Notably,  
16 inhibition of high glucose metabolism significantly upregulated expression of mature AT1  
17 makers (Fig. 7D). With immunostaining, we confirmed that AT2 cells with persistent IL-1 $\beta$   
18 treatment failed to generate mature AT1 cells expressing *Cav-1*, a late AT1 cell marker,  
19 whereas the expression level of *Hopx*, an early AT1 cell marker, was comparable to that seen  
20 in control (Fig. 7E). Importantly, 2-DG-treated organoids rescued the impaired maturation of  
21 AT1 cells even in the presence of IL-1 $\beta$  (Fig. 7E).

22 We hypothesized that a chronic inflammatory environment will lead to a gradual  
23 accumulation of DATPs and eventually defective differentiation and declined lung  
24 regeneration. Consistent with our data, recent studies using a high-resolution scRNA-seq  
25 analysis reported that a transcriptionally distinct population aberrantly accumulates in a non-  
26 permissive pathologic environment such as idiopathic pulmonary fibrosis (IPF) (Adams et al.,  
27 2019; Habermann et al., 2019; Kobayashi et al., 2019; Wu et al., 2020). Notably, we also  
28 observed abundant KRT8<sup>+</sup>CLDN4<sup>+</sup> DATPs-like cells next to HTII-280<sup>+</sup> AT2 cells in alveolar  
29 regions of IPF patient tissue samples, but not within the alveoli of normal donor lung (Fig. 7,  
30 F-H). In addition, given the close relationship between chronic inflammation and lung cancer,  
31 and recent reports suggesting transcriptional features of injury responses in lung tumor cells,  
32 we also found that KRT8<sup>+</sup>CLDN4<sup>+</sup> DATPs-like cells are observed within the tumor in patient  
33 tissue samples of lung adenocarcinoma (Fig. S12) (Conway et al., 2016; Mantovani et al., 2008;

1 Maynard et al., 2019; Moll et al., 2018). Taken together, these findings demonstrate that  
2 chronic inflammatory signals cause dysregulation of DATPs, which leads to development  
3 and/or progression of human lung diseases.

## 4 5 **Discussion**

6  
7 Effectively coordinated tissue repair is critical for maintenance of tissue integrity and function.  
8 In responding to environmental assault, the ability to sense physiological changes is essential  
9 for stem cells to initiate repair and resolve damage. Here, we focused on how inflammatory  
10 stimuli direct the cell fate behavior of AT2 stem cells during lung injury repair. Our data reveals,  
11 for the first time, the detailed step-wise differentiation trajectories of AT2 cells, which are  
12 regulated by IL-1 $\beta$ -mediated inflammatory signals during the regeneration process.  
13 Significantly, we identified *Il1r1*<sup>+</sup>AT2 cells and Damage-Associated Transient Progenitors  
14 (DATPs) as two classes of regenerative cell populations dedicated to lung injury repair. Our  
15 findings bring new insight into how unresolved inflammation mediated by persistent IL-1 $\beta$   
16 signals prevents cell fate transitions, resulting in impaired regeneration and eventually leading  
17 to lung diseases (Fig. 8).

18 Although mechanisms underlying alveolar regeneration are complex, our scRNA-seq  
19 analysis of *in vivo* AT2 lineage-labeled cells and AT2 cell-derived organoids defines the  
20 precise reprogramming of AT2 cells into AT1 cells during injury repair. We discovered two  
21 distinct populations, pAT2 cells and DATPs, as intermediaries between quiescent AT2 and  
22 terminally differentiated AT1 lineages. pAT2 cells highly express genes that respond to  
23 inflammation (e.g. *Pteges*, *Orml1*, *Zbp1*), are involved in promoting angiogenesis (e.g. *Lrg1*,  
24 *Cxcl17*, and *Egfl6/7*) and reduce reactive oxidative species (ROS) (e.g. *Glx*, *Prdx4*, and  
25 *Gstk1/2*). These properties suggest that pAT2 cells actively respond to inflammatory stimuli,  
26 reshaping reciprocal interactions between epithelial cells and their niches during tissue repair.  
27 pAT2 cells display much lower expression of genes that are essential for AT2 identity and  
28 maintenance such as *Etv5* and *Abca3*, while still expressing comparable levels of canonical  
29 AT2 markers such as *Sftpc* and *Lyz2*. These transcriptional signatures were also seen in IL-1 $\beta$   
30 -treated AT2 cells, leading us to classify pAT2 cells as a population that is skewed towards the  
31 AT1 cell fate.

32 Our data reveal that pAT2 cells share a transcriptional program resembling that of cAT2  
33 cells but with lower expression levels of cell cycle genes (e.g. *MKi67*, *Cdk1*). Interestingly, we  
34 found that transcriptional signatures of pAT2 cells were upregulated during the transition from

1 S to G2/M phase in the cell cycle, suggesting the possibility of entering primed states after  
2 exiting proliferation states although further validation studies such as genetic tracing of cAT2  
3 or pAT2 cells are needed to provide the delineated sequence of trajectory between these two  
4 states. In addition, at variance with a previous study in *Il1r1*<sup>-/-</sup> mice (Katsura et al., 2019), we  
5 found that proliferative activity of AT2 cells is not directly altered by *Il1r1* depletion in AT2  
6 cells. Instead, our findings in organoid co-culture experiments revealed that stromal cells  
7 responding to IL-1 $\beta$  likely support AT2 cell proliferation. scRNA-seq analysis of stromal cells  
8 co-cultured with AT2 cells showed that expression of growth factors facilitating AT2 cell  
9 proliferation, such as EGFR ligands (e.g. *Ereg*), *Spp1*, and *Hgf* (Ganguly et al., 2014; Zeng  
10 et al., 2016) was dramatically increased in IL-1 $\beta$ -treated stromal cells, whereas *Bmp4*  
11 (Weaver et al., 2000), which is known to inhibit AT2 cell proliferation was significantly  
12 reduced (Fig. S6, C-E). The negative regulators for Bmp4 signaling such as *Grem1/2* were  
13 increased in IL-1 $\beta$ -treated stromal cells. Notably, cAT2 cells acquire transcriptional  
14 characteristics of pAT2 cells coupled with upregulation of *Il1r1* expression at the transition  
15 from S to G2/M phase. These data suggest that IL-1 $\beta$  directly reprograms daughter AT2 cells  
16 to enter primed states during the G2/M phase to initiate cell fate transitions without direct  
17 influences on cell proliferation. How IL-1 $\beta$  signaling triggers priming of AT2 cells to initiate  
18 the differentiation progress remains unknown. Recently, Wnt signaling was reported to prevent  
19 reprogramming of AT2 cells into AT1 cells (Nabhan et al., 2018), suggesting that crosstalk  
20 between IL-1 $\beta$  and Wnt signaling underlies control of cell fate transitions from naïve AT2 to  
21 primed cell states.

22 We discovered a previously unidentified DATP population as an intermediate plastic  
23 subpopulation between pAT2 and AT1 cell differentiation states. DATPs expressing *Ndr1*,  
24 *Cldn4* and *Krt8* are extremely rare at steady-state, yet are significantly induced after injury by  
25 IL-1 $\beta$ -mediated inflammatory signaling. Lineage-tracing analysis demonstrated their capacity  
26 to give rise to new AT1 cells during alveolar regeneration after injury. Specifically, we  
27 determined that IL-1 $\beta$ -driven inflammation and regulation of the *Hif1a* signaling pathway is  
28 essential for DATPs generation. Specific deletion of *Hif1a* in AT2 cells impaired this  
29 progression, resulting in deficient production of new AT1 cells. In addition, we also defined  
30 that reduction of IL-1 $\beta$ -driven glycolysis is required for transition of DATPs towards initiating  
31 AT1 lineage differentiation. This finding suggests that IL-1 $\beta$ -mediated inflammation and  
32 transient glycolytic metabolism by generating DATPs may establish a checkpoint determining  
33 entry into mature AT1 cell differentiation programs. Of note, DATPs reveal quiescent  
34 characteristics represented by expression of cell cycle inhibition, p53 signaling, and senescence

1 marker genes. In addition, emerging evidence supported by a high-resolution scRNA-seq  
2 technology suggests an essential role of ‘intermediates’ during developmental process in  
3 governing cell fate choices (Olsson et al., 2016). Interestingly, we also found that DATPs may  
4 have the plasticity required to revert to the AT2 lineage, in addition to proceeding towards AT1  
5 differentiation.

6 By combining lineage-tracing and ATAC-seq analysis we uncovered that *Il1r1*<sup>+</sup>AT2  
7 cells take on distinct epigenetic state as they efficiently replenish damaged alveolar lineages in  
8 response to IL-1 $\beta$  inflammatory signals. Specific open-chromatin states in regions recognized  
9 by epigenetic regulators, including chromatin remodellers (e.g. Ino80) and epigenetic  
10 modifiers (e.g. Hat1), allow for their rapid and organized responsiveness to injury during the  
11 regeneration process. Significantly, we found that DATPs are mainly arising from *Il1r1*<sup>+</sup>AT2  
12 cells in response to IL-1 $\beta$  signaling after injury. Recently, *Axin2*<sup>+</sup>AT2 cells have been identified  
13 as a distinct subset of AT2 cells (Nabhan et al., 2018; Zacharias et al., 2018). Related with the  
14 potential role of interconnectivity between IL-1 $\beta$  and Wnt signaling in fate decision of AT2  
15 cells, comparison between *Il1r1*<sup>+</sup>AT2 and *Axin2*<sup>+</sup>AT2 cells will be helpful to understand their  
16 relationships during alveolar regeneration.

17 Resolution of inflammation is a coordinated and active process aimed at restoration of  
18 tissue integrity and function. Our data highlight the importance of macrophage activation in  
19 the transient inflammatory niche after tissue injury. The increased number of IMs and level of  
20 IL-1 $\beta$  peaked at day 14 and resolved to the homeostatic level at day 28 after injury. Analysis  
21 of lineage-tracing and scRNA-seq data also revealed that pAT2 cells and DATPs appearing  
22 after injury become dramatically reduced as tissue returns to homeostasis. However,  
23 significantly, we found that sustained IL-1 $\beta$  signaling causes the defects in the transition from  
24 DATPs to terminal differentiation to AT1 lineage, which results in the impaired regeneration.  
25 Our finding, for the first time, reveals the cellular and molecular mechanisms how chronic  
26 inflammation is implicated in the tissue dysfunction and pathogenesis. Two recent studies  
27 showed fibrosis-specific KRT17<sup>+</sup> cell populations in patient tissues of idiopathic pulmonary  
28 fibrosis (IPF) (Adams et al., 2019; Habermann et al., 2019). Here, we find that these  
29 populations and DATPs have similar transcriptional signatures, also supported by a recent  
30 preprint showing the enriched signatures of *Cldn4*<sup>+</sup> pre-AT1 transitional state in these KRT17<sup>+</sup>  
31 populations in IPF tissues (Kobayashi et al., 2019). Furthermore, we detected KRT8<sup>+</sup>CLDN4<sup>+</sup>  
32 DATPs-like cells in the alveolar regions of IPF tissue samples. In addition, several studies have  
33 revealed that mechanisms underlying cancer development co-opt regeneration programs to  
34 drive tumoral cellular heterogeneity (Maynard et al., 2019; Moll et al., 2018). Congruent with



1 this work, we also observed DATP-like cells in tissue samples of human lung adenocarcinoma.  
2 Our results strongly suggest that fine modulation of DATPs by IL-1 $\beta$ -mediated transient  
3 inflammatory niche during injury repair is critical for effective lung restoration and is a  
4 potential therapeutic adjunct for treating lung diseases.

#### 5 **Limitations of the Study**

6 Our study identified subsets of *Il1r1*<sup>+</sup>AT2 cells having distinctive epigenetic signatures and  
7 quickly responding to injury-induced inflammation for efficient AT1 cell generation. Despite  
8 it is clear that only a subset of AT2 cells expressed *Il1r1* and expanded up to 60% of total AT2  
9 cells during injury repair, we cannot completely rule out the possibility of stochastic expression  
10 of cre recombination for *Il1r1* expression during repair process due to the remained tamoxifen  
11 activity. Longer wash out periods than 16 days may provide clearer evidences to further define  
12 the functionally distinctive subsets of *Il1r1*<sup>+</sup>AT2 cells during injury repair.

13

14



## 1 **Acknowledgement**

2 We would like to thank Emma Rawlins (University of Cambridge, UK) for valuable scientific  
3 discussions and sharing the mouse lines; We would like to thank Randall Johnson (University  
4 of Cambridge, UK) for sharing *Hif1a<sup>flox/flox</sup>* mouse line; Nisha Narayan and Brian Huntly for  
5 sharing materials and discussion on glycolysis experiments; Irina Pshenichnaya (Histology),  
6 Maïke Paramor (NGS library), Peter Humphreys (Imaging), Andy Riddell (Flow cytometry),  
7 Simon McCallum (Flow cytometry, Cambridge NIHR BRC Cell Phenotyping Hub), Katarzyna  
8 Kania (single cell sequencing at Cancer Research UK), and Cambridge Stem Cell Institute core  
9 facilities for technical assistance; Papworth Hospital Research Tissue Bank for providing tissue  
10 samples from IPF and lung adenocarcinoma (T02233); Kelly Evans for sharing histology  
11 samples of human lung tissue samples; Seungmin Han and Woochang Hwang for discussion  
12 on the scRNA-seq analysis; Life Science Editors for editorial assistance; All Lee Lab members  
13 for helpful discussion. This work was supported by Wellcome and the Royal Society  
14 (107633/Z/15/Z) and European Research Council Starting Grant (679411). J.C. was supported  
15 by the National Research Foundation of Korea (NRF) funded by the Ministry of Education  
16 (2017R1A6A3A03005399).

17

18 **Author contribution:** J.C. and J.-H.L. designed the experiments, interpreted the data, and  
19 wrote the manuscript; J.C. performed most experiments and data analysis; J.-E.P. performed  
20 and analyzed scRNA-seq data; G.T. and N.H. analyzed ATAC-seq data; M.Y. shared *Ndr1-*  
21 *Cre<sup>ERT2</sup>* mouse line; B.-K.K. helped the generation of *Il1r1-Cre<sup>ERT2</sup>* mouse line.

22

23 **Declaration of interests:** The authors declare that they have no competing interests.

24

25

26

1 **STAR METHODS**

2 **KEY RESOURCES TABLE**

| REAGENT or RESOURCE                                  | SOURCE                   | IDENTIFIER         |
|------------------------------------------------------|--------------------------|--------------------|
| <b>Antibodies (Flow cytometry)</b>                   |                          |                    |
| CD45 (30-F11)-APC                                    | BD Biosciences           | Cat #: 559864      |
| CD31 (MEC13.3)-APC                                   | BD Biosciences           | Cat #:551262       |
| Biotin- conjugated mouse lineage (Lin) panel         | Biolegend                | Cat #:13307        |
| EpCAM (G8.8)-PE-Cy7                                  | BioLegend                | Cat #:118216       |
| Sca-1 (Ly-6A/E, D7)–APC-Cy7                          | BioLegend                | Cat #:560654       |
| MHC-II (I-A/I-E, M5)-FITC                            | ebioscience              | Cat #:11-5321-81   |
| CD64 (X54-5/7.1)-PeCy7                               | BioLegend                | Cat #:139313       |
| CD24(M1/69)-APC                                      | ebioscience              | Cat #:101813       |
| Siglec-F(E50-2440)-PE                                | BD Bioscience            | Cat #:562068       |
| <b>Antibodies (Immunofluorescence)</b>               |                          |                    |
| Goat anti-SP-C                                       | Santa Cruz               | Cat #: sc-7706     |
| Rabbit pro-SP-C                                      | Millipore                | Cat #: AB3786      |
| Rabbit anti-Ki67                                     | A. Menarini              | Cat #: MP-325-CRM1 |
| Rat anti-Ki67                                        | Biolegend                | Cat #: A16A8       |
| Rabbit anti-RFP                                      | Rockland                 | Cat #: 600–401379  |
| Hamster anti-PDPN (T1 $\alpha$ )                     | DSHB                     | Cat #: 8.1.1       |
| Rat anti-Cytokeratin-8                               | DSHB                     | Cat #: TROMA-I     |
| Rabbit anti-Claudin-4                                | Thermo Fisher Scientific | Cat #: 36-4800     |
| Rabbit anti-Hopx                                     | Santa Cruz               | Cat #: sc-30216    |
| Rabbit anti-Aqp5                                     | Alomone Labs             | Cat #: AQP5-005    |
| Rabbit anti-Caveolin-1                               | Cell Signaling           | Cat #: 3267        |
| Mouse anti-Acetyl Tub                                | Sigma-Aldrich            | Cat: # T7451       |
| Mouse anti-HTII-280                                  | Terrace Biotechnology    | TB-27AHT2-280      |
| Alexa Fluor 647 donkey anti-mouse IgG (H+L)          | Thermo Fisher Scientific | Cat #: A-31571     |
| Alexa Fluor 647 donkey anti-rabbit IgG (H+L)         | Thermo Fisher Scientific | Cat #: A-31571     |
| Alexa Fluor 647 donkey anti-goat IgG (H+L)           | Thermo Fisher Scientific | Cat #: A-31573     |
| Alexa Fluor 488 donkey anti-rat IgG (H+L)            | Thermo Fisher Scientific | Cat #: A-21208     |
| Alexa Fluor 488 donkey anti-mouse IgG (H+L)          | Thermo Fisher Scientific | Cat #: A-21202     |
| Alexa Fluor 488 donkey anti-rabbit IgG (H+L)         | Thermo Fisher Scientific | Cat #: A-21206     |
| Alexa Fluor 555 donkey anti-rabbit IgG (H+L)         | Thermo Fisher Scientific | Cat #: A-31572     |
| Alexa Fluor 555 donkey anti-rat IgG (H+L)            | Thermo Fisher Scientific | Cat #: A-21434     |
| Alexa Fluor 647 goat anti-hamster IgG (H+L)          | Thermo Fisher Scientific | Cat #: A-21451     |
| Alexa Fluor 488 Donkey anti-hamster IgG (H+L)        | Thermo Fisher Scientific | Cat #: A-21110     |
| <b>Chemicals, Peptides, and Recombinant Proteins</b> |                          |                    |
| Tamoxifen                                            | Sigma-Aldrich            | Cat #: T5648-1G    |
| Corn Oil                                             | Sigma-Aldrich            | Cat #: C8267-500ML |
| Bleomycin                                            | Sigma-Aldrich            | Cat #: B5507-15UN  |
| Growth factor-reduced (GFR) Matrigel (10ml)          | Corning                  | Cat #: 356231      |
| Dispase (50U/ml)                                     | Corning                  | Cat #: 354235      |
| Collagenase/dispase                                  | Roche                    | Cat #: 10269638001 |
| DNase I                                              | Sigma-Aldrich            | Cat #: D4527-10KU  |
| TrypLE Express                                       | Gibco                    | Cat #: 12604021    |
| 2-NDBG                                               | Thermo Fisher Scientific | Cat #: N13195      |
| ITS                                                  | Corning                  | Cat #: 25-800-CR   |
| D-Glucose                                            | Sigma-Aldrich            | Cat #: G8270       |
| 2-Deoxy Glucose                                      | Sigma-Aldrich            | Cat #: D8375       |
| Digoxin                                              | Sigma-Aldrich            | Cat #: D6003       |

|                                                                                |                                   |                                                                                                                                                       |
|--------------------------------------------------------------------------------|-----------------------------------|-------------------------------------------------------------------------------------------------------------------------------------------------------|
| DAPI                                                                           | Sigma-Aldrich                     | Cat #: D9542                                                                                                                                          |
| ROCK inhibitor Y-27632                                                         | Cambridge bioscience              | Cat #: SM02-100                                                                                                                                       |
| murine IL-1 $\beta$                                                            | Peprotech                         | Cat #: 211-11B                                                                                                                                        |
| murine IL-1 $\alpha$                                                           | Peprotech                         | Cat #: 211-11A                                                                                                                                        |
| murine GM-CSF                                                                  | Peprotech                         | Cat #: 315-03-5                                                                                                                                       |
| human IL-18                                                                    | R&D system                        | Cat #: 9124-IL                                                                                                                                        |
| <b>Critical Commercial Assays</b>                                              |                                   |                                                                                                                                                       |
| Click-iT <sup>®</sup> EdU Imaging Kits                                         | Thermo Fisher Scientific          | Cat #: C10640, C10337                                                                                                                                 |
| Seahorse glycolysis stress test kit                                            | Agilent Technologies              | Cat #: 103020-100                                                                                                                                     |
| Superscript IV cDNA synthesis kit                                              | Invitrogen                        | Cat #: 18090050                                                                                                                                       |
| <b>Deposited Data</b>                                                          |                                   |                                                                                                                                                       |
| scRNA-sequencing for <i>ex vivo</i> organoids treated with PBS or IL-1 $\beta$ | This Paper                        | GEO: GSE144468                                                                                                                                        |
| scRNA-sequencing for <i>in vivo</i> AT2-lineage tracing                        | This Paper                        | GEO: GSE145031                                                                                                                                        |
| ATAC-sequencing for bulk AT2 cells and <i>Il1r1</i> <sup>+</sup> AT2 cells     | This Paper                        | GEO: GSE144598                                                                                                                                        |
| <b>Experimental Models: Organisms/Strains</b>                                  |                                   |                                                                                                                                                       |
| <i>Mouse: SPC-Cre<sup>ERT2</sup></i>                                           | Barkauskas et al., 2013           | Jackson Laboratory: Stock number: 028054                                                                                                              |
| <i>Mouse: Ndrp1-Cre<sup>ERT2</sup></i>                                         | <i>Endo et al., 2015</i>          | Contact: Dr. Motoko Yanagita (Kyoto University, JP)                                                                                                   |
| <i>Mouse: Krt8-Cre<sup>ERT2</sup></i>                                          | <i>Van Keymeulen et al., 2011</i> | Jackson Laboratory: Stock number: 017947                                                                                                              |
| <i>Mouse: Hi1fa<sup>flox/flox</sup></i>                                        | <i>Garayoa et al., 2000</i>       | Jackson Laboratory: Stock number: 007561                                                                                                              |
| <i>Mouse: Il1r1<sup>flox/flox</sup></i>                                        | <i>Robson et al., 2016</i>        | Jackson Laboratory: Stock number: 028398                                                                                                              |
| <i>Mouse: Rosa26-lox-stop-lox-tdTomato</i>                                     | <i>Madisen et al., 2010</i>       | Jackson Laboratory: Stock number: 007914                                                                                                              |
| <i>Mouse: Il1r1-Cre<sup>ERT2</sup></i>                                         | This paper                        | N/A                                                                                                                                                   |
| <b>Oligonucleotides</b>                                                        |                                   |                                                                                                                                                       |
| Taqman probe for murine Ager                                                   | Thermo Fisher Scientific          | Mm_00545815_m1                                                                                                                                        |
| Taqman probe for murine Pdpn                                                   | Thermo Fisher Scientific          | Mm_00494716_m1                                                                                                                                        |
| Taqman probe for murine Aqp5r                                                  | Thermo Fisher Scientific          | Mm_00437578_m1                                                                                                                                        |
| Taqman probe for murine Gapdh                                                  | Thermo Fisher Scientific          | Mm_00805216_m1                                                                                                                                        |
| Primer for qPCR of SYBR Green                                                  | See the method section of RT-PCR  |                                                                                                                                                       |
| <b>Software and Algorithms</b>                                                 |                                   |                                                                                                                                                       |
| FlowJo software                                                                | Tree Star                         | <a href="https://www.flowjo.com">https://www.flowjo.com</a>                                                                                           |
| Prism software package version 7.0                                             | GraphPad                          | <a href="https://www.graphpad.com/scientific-software/prism/">https://www.graphpad.com/scientific-software/prism/</a>                                 |
| Fiji software                                                                  |                                   | <a href="https://imagej.net/Fiji">https://imagej.net/Fiji</a>                                                                                         |
| HOMER software                                                                 | Heinz et al., 2010                | <a href="http://homer.ucsd.edu/homer/">http://homer.ucsd.edu/homer/</a>                                                                               |
| ChIPseeker R/Bioconductor package                                              | Yu et al., 2015                   | <a href="https://bioconductor.org/packages/release/bioc/html/ChIPseeker.html">https://bioconductor.org/packages/release/bioc/html/ChIPseeker.html</a> |
| deepTools2                                                                     | Ramirez et al., 2016              | <a href="https://deeptools.readthedocs.io/en/develop/index.html">https://deeptools.readthedocs.io/en/develop/index.html</a>                           |
| MACS2 callpeak                                                                 | Feng et al., 2012                 | <a href="https://github.com/taoliu/MACS/">https://github.com/taoliu/MACS/</a>                                                                         |

|                                                   |                     |                                                                                                                                                                                           |
|---------------------------------------------------|---------------------|-------------------------------------------------------------------------------------------------------------------------------------------------------------------------------------------|
| Cell Ranger Software Suite (version 2.0.2)        | 10x Genomics Inc    | <a href="https://support.10xgenomics.com/single-cell-gene-expression/software/downloads/latest">https://support.10xgenomics.com/single-cell-gene-expression/software/downloads/latest</a> |
| Scanpy: python package (version 1.3.6)            | Wolf et al., 2018   | <a href="https://icb-scanpy.readthedocs-hosted.com/en/stable/">https://icb-scanpy.readthedocs-hosted.com/en/stable/</a>                                                                   |
| Seurat v2.0                                       | Butler et al., 2018 | <a href="https://satijalab.org/seurat/">https://satijalab.org/seurat/</a>                                                                                                                 |
| Other                                             |                     |                                                                                                                                                                                           |
| 24-well Transwell insert with a 0.4- $\mu$ m pore | Corning             | Cat #: 3470                                                                                                                                                                               |
| $\mu$ -Slide 8 wells                              | ibidi               | Cat #: 80826                                                                                                                                                                              |

1

## 2 **Methods**

3

4 **Animals.** *SPC-Cre<sup>ERT2</sup>* (Barkauskas et al., 2013), *Rosa26-lox-stop-lox-tdTomato*  
5 (Madisen et al., 2010), *NdrG1-Cre<sup>ERT2</sup>* (Endo et al., 2015), *Krt8-Cre<sup>ERT2</sup>* (Van Keymeulen et  
6 al., 2011), *Hilfa<sup>lox/lox</sup>* (Garayoa et al., 2000), and *Il1r1<sup>lox/lox</sup>* (Robson et al., 2016) mice have  
7 been described and are available from Jackson Laboratory. *Il1r1-P2A-eGFP-IRES-Cre<sup>ERT2</sup>*  
8 (*Il1r1-Cre<sup>ERT2</sup>*) mice were generated in our laboratory. Mice for the lineage tracing and injury  
9 experiments were on a C57BL/6 background and 6-10 weeks old mice were used for most of  
10 the experiments described in this study. Experiments were approved by local ethical review  
11 committees and conducted according to UK Home Office project license PC7F8AE82. Mice  
12 were bred and maintained under specific-pathogen-free conditions at the Cambridge Stem Cell  
13 Institute and Gurdon Institute of University of Cambridge.

14

15 **Tamoxifen.** Tamoxifen (Sigma) was dissolved in Mazola corn oil (Sigma) in a 20mg/ml stock  
16 solution. 0.2mg/g body weight tamoxifen was given via intraperitoneal (IP) injection. The  
17 numbers and date of treatment are indicated in the individual figures of experimental scheme.

18

19 **Bleomycin Administration.** 6-10 week mice were anaesthetised via inhalation of isoflurane for  
20 approximately 3 mins. The mice were positioned on the intratracheal intubation stand, and  
21 1.25U/kg of bleomycin, or PBS control, were delivered intratracheally by a catheter (22G).  
22 During the procedure anaesthesia was maintained by isoflurane and oxygen delivery.

23

24 **3D Lung organoid co-culture.** Lung organoids were established following the previous report  
25 (Lee et al., 2014). Briefly, freshly sorted lineage-labeled cells were resuspended in 3D basic  
26 media (DMEM/F12 (Gibco) supplemented with 10% FBS. (Gibco) and ITS (Insulin-

1 Transferrin-Selenium, Corning)), and mixed with cultured lung stromal cells, followed by  
2 resuspension in growth factor-reduced Matrigel (BD Biosciences) at a ratio of 1:5. A 100  $\mu$ l  
3 mixture was placed in a 24-well Transwell insert with a 0.4- $\mu$ m pore (Corning). Approximately  
4  $5 \times 10^3$  *SPC*<sup>+</sup> cells were seeded in each insert. 500  $\mu$ L of 3D basic media was placed in the  
5 lower chamber, and medium was changed every other day with or without IL-1 $\beta$  (20ng/ml,  
6 Peprotech), Digoxin (50 $\mu$ M, Sigma), and 2-deoxyglucose (5mM, Sigma). ROCK inhibitor  
7 Y27632 (10 $\mu$ M, Sigma) was added in the medium for the first 2 days of culture. For isolation  
8 of stroma cells, cells negatively isolated by CD31 via MACS column were further negatively  
9 sorted by CD326 (EpCAM) and CD45 microbeads (Miltenyi Biotech). For co-culture with  
10 macrophages, sorted interstitial or alveolar macrophages were added to organoids with lineage-  
11 labeled *SPC*<sup>+</sup> cells at a ratio of 1:6 in the presence of lung stromal cells. GM-CSF (20ng/ml,  
12 Peprotech) was included in some cultures. Analysis of colony forming efficiency (C.F.U) and  
13 size of organoids were at 14 days after plating if there is no specific description. For organoid  
14 culture of DATPs, AT2 cells (CD31<sup>-</sup>CD45<sup>-</sup>EpCAM<sup>+</sup>MHCII<sup>+</sup>) isolated from *Krt8*-  
15 *Cre*<sup>ERT2</sup>; *R26*<sup>tdTomato</sup> were cultured with for 14 days with IL-1 $\beta$  (20ng/ml, Peprotech). Then, 4-  
16 OH tamoxifen was added at day14 and day16 in culture to label *Krt8*-expressing cells.  
17 Organoids were cultured with EpCAM<sup>+</sup>MHCII<sup>-</sup>Tomato<sup>+</sup> DATPs isolated by flow cytometry.  
18

19 **Lung tissue dissociation and flow cytometry.** Lung tissues were dissociated with a  
20 collagenase/dispase solution as previously described. Briefly, after lungs were cleared by  
21 perfusion with cold PBS through the right ventricle, 2 mL of dispase (BD Biosciences, 50 U/ml)  
22 was instilled into the lungs through the trachea until the lungs inflated, followed by instillation  
23 of 1% low melting agarose (BioRad) through the trachea to prevent leakage of dispase. Each  
24 lobe was dissected and minced into small pieces in a conical tube containing 3 ml of PBS,  
25 60  $\mu$ L of collagenase/dispase (Roche), and 7.5  $\mu$ L of 1% DNase I (Sigma) followed by rotating  
26 incubation for 45 min at 37°C. The cells were then filtered sequentially through 100- and 40-  
27  $\mu$ m strainers and centrifuged at 1000rpm for 5 min at 4°C. The cell pellet was resuspended in  
28 1ml of ACK lysis buffer (0.15 M NH<sub>4</sub>Cl, 10mM KHCO<sub>3</sub>, 0.1 mM EDTA) and lysed for 90 s  
29 at room temperature. 6 ml basic F12 media (GIBCO) was added and 500  $\mu$ l of FBS (Hyclone)  
30 was slowly added in the bottom of tube. Cells were centrifuged at 1500 rpm for 5 min at 4°C.  
31 The cell pellet was resuspended in PF10 buffer (PBS with 10% FBS) for further staining. The  
32 antibodies used were as follows: CD45 (30-F11)-APC or -APC-Cy7 (BD Biosciences), CD31  
33 (MEC13.3)-APC (BD Biosciences), Biotin- conjugated mouse lineage (Lin) panel that

1 contains anti-B220 (RA3-6B2), -CD3 $\epsilon$ (145-2C11), -Gr-1 (RB6-8C5), -CD11b (Mac-1, M1/70),  
2 -Ter-119 antibodies (Biolegend), EpCAM (G8.8)-PE-Cy7 or FITC (BioLegend), Sca-1 (Ly-  
3 6A/E, D7)-APC-Cy7 (BD Bioscience), MHC-II (I-A/I-E, M5)-FITC (eBioscience), CD64  
4 (X54-5/7.1)-PeCy7 (Biolegend), CD24(M1/69)-APC (eBioscience), and Siglec-F(E50-2440)-  
5 PE (BD Bioscience). 4', 6-diamidino-2-phenylindole (DAPI) (Sigma) was used to eliminate  
6 dead cells. Data were acquired on LSRII analyzer (BD Bioscience) and then analyzed with  
7 FlowJo software (Tree Star). MOFLO system (Beckman Coulter) was used for the sorting at  
8 Wellcome-MRC Stem Cell Institute Flow Cytometry Facility.

9

### 10 **Human Adult Lung Tissue**

11 Papworth Hospital NHS Foundation Trust (Research Tissue Bank Generic REC approval,  
12 Tissue Bank Project number T02233) provided deidentified lung samples obtained from IPF  
13 patients at the time of transplantation, normal background lung tissue from adult donor lungs  
14 that were deemed unsuitable for transplant, and lung adenocarcinoma tissues from lobectomies.  
15 Fresh tissues were fixed with 4% paraformaldehyde (PFA) overnight at 4°C and paraffin  
16 sections (7 $\mu$ m) were used for immunofluorescent (IF) analysis.

17

18 **Macrophage culture *in vitro*.** Interstitial macrophages (CD45<sup>+</sup>CD64<sup>+</sup>Siglec-F<sup>-</sup>CD11b<sup>high</sup>) or  
19 alveolar macrophages (CD45<sup>+</sup>CD64<sup>+</sup>Siglec-F<sup>+</sup>CD11b<sup>low</sup>) were isolated from C57BL/6 by  
20 MOFLO system (Beckman Coulter). Isolated macrophages were cultured for 24 hrs in RPMI-  
21 1640 medium containing 10% FBS and 50 $\mu$ M 2-mercaptoethanol with or without GM-CSF  
22 (10 ng/ml).

23

24 **EdU incorporation Assays in organoids.** Lineage-labeled AT2 cells from  
25 *Il1r1*<sup>flox/+</sup>;R26R<sup>tdTomato</sup> or *Il1r1*<sup>flox/flox</sup>;R26R<sup>tdTomato</sup> mice given by two doses of tamoxifen were  
26 isolated at day 4 post final injection. Organoids established in 8 well chamber slides ( $\mu$ -Slide  
27 8 wells, ibidi) were treated with EdU (10 $\mu$ M) at day 4 for 4 hrs. EdU staining was performed  
28 according to manufacturer's instructions (Click-iT<sup>®</sup> EdU Imaging Kits, Thermo Fisher  
29 Scientific).

30

31 **Measurement of Extracellular Acidification Rate (ECAR).** ECAR of organoids was  
32 measured using a XF94 analyzer (Seahorse Bioscience). Seahorse plates were pre-coated with  
33 10% Matrigel in PBS for 1hr at 37°C. Organoids treated with PBS control or IL-1 $\beta$  were added  
34 with dispase to remove Matrigel and washed twice with XF Base Medium (DME, pH 7.4)



1 supplemented with 1mM glutamine (Seahorse Bioscience). 30,000 cells were seeded on each  
2 well and incubated for 1hr at 37°C in non-CO<sub>2</sub> incubator before measurement. Three  
3 components were injected automatically during the assay to achieve the following final  
4 concentrations: Glucose (10mM), Oligomycin (1µM), and 2-Deoxy Glucose (2-DG, 50mM).  
5 ECAR were normalized to the cell numbers of each wells.

6  
7 **Glucose Uptake (2-NBDG incorporation) assays.** Organoids at day 14 were washed twice  
8 with PBS and incubated with glucose-free medium supplemented with 10% FBS and GlutaMax  
9 (Gibco) for 1hr. 200µM of 2-NBDG (Life Technologies) were subsequently added for 1hr.  
10 Organoids were dissociated into single cells with tryPLE Express (Gibco) and cells were  
11 harvested for flow cytometry. A control sample lacking 2-NBDG was used to set the flow  
12 cytometer compensation and gate parameters for 2-NBDG positive events.

13  
14 **Quantitative RT-PCR.** Total RNA was isolated using TRI- reagent (Molecular Research  
15 Center) or using a Qiagen RNeasy Micro Kit according the manufacturer's instructions.  
16 Equivalent quantities of total RNA were reverse-transcribed with SuperScript cDNA synthesis  
17 kit (Life Technology) or QuantiTect (Qiagen). Diluted cDNA was analyzed by real-time PCR  
18 (StepOnePlus; Applied Biosystem). Pre-designed probe sets and TaqMan universal PCR  
19 Master Mix (2x, Thermo Fisher Scientific) were used as follows: Ager (Mm\_00545815\_m1),  
20 Pdpn (Mm\_00494716\_m1), Aqp5 (Mm\_00437578\_m1). Gapdh expression  
21 (Mm\_00805216\_m1) was used to normalise samples using the  $\Delta$ Ct method. Sybr green assays  
22 were also used with SYBR Green Master Mix (2x, Thermo Fisher Scientific). Primer sequences  
23 are as follows:

24  
25 Gapdh: F-AGGTCGGTGTGAACGGATTTG, R-TGTAGACCATGTAGTTGAGGTCA  
26 Vegfa: F-CCGGTTTAAATCCTGGAGCG, R-TTAACTCAAGCTGCCTCGC  
27 Clic5: F-ATGACGGACTCAGCGACAAC, R-GTAGATCGGCTGGCTTTCTTTT  
28 Cav-1: F-TGAGAAGCAAGTGTATGACGC, R-CTTCCAGATGCCGTCGAAAC  
29 Aqp5: F-TCTTGTGGGATCTACTTCACC, R-TGAGAGGGGCTGAACCGAT  
30 Sdpr: F-GCTGCACAGGCAGAAAAGTTC, R-GTGACAGCATTACCTGCG  
31 Spock2: F-ACCCCCGGCAATTCATGG, R-TGTCTTCCCAGCTCTTGATGTAA  
32 Limch2: F-AAAGGCCCTTCAGATACGGTC, R-TACTCGTGCTCTCTGCGTCAT  
33 Etv5: F-TCAGTCTGATAACTTGGTGCTTC, R-GGCTTCCTATCGTAGGCACAA  
34 Abca3: F-CAGCTCACCCCTCCTACTCTG, R-ACTGGATCTTCAAGCGAAGCC



1 Lpcat1: F-GGCTCCTGTTTCGCTGCTTT, R-TTCACAGCTACACGGTGGAAG  
2 Itga7: F-CTGCTGTGGAAGCTGGGATTC, R-CTCCTCCTTGAAGCTGCTGTCG  
3 Lrg1: F-TTGGCAGCATCAAGGAAGC, R-CAGATGGACAGTGTCGGCA  
4 Orm1: F-CGAGTACAGGCAGGCAATTCA, R-ACCTATTGTTTGAGACTCCCGA  
5 Slc2a1: F-CAGTTCGGCTATAACACTGGTG, R-GCCCCCGACAGAGAAGATG  
6 Slc16a3: F-TCACGGGTTTCTCCTACGC, R-GCCAAAGCGGTTACACAC  
7 Cldn4: F-GTCCTGGGAATCTCCTTGGC, R-TCTGTGCCGTGACGATGTTG  
8 Hif1a: F-ACCTTCATCGGAAACTCCAAAG, R-ACTGTTAGGCTCAGGTGAACT  
9 IL-1 $\beta$ : F-GCAACTGTTCTGAACTCAACT, R-ATCTTTTGGGGTCCGTCAACT  
10 IL-13: F-CCTGGGCTCTTGTCTGCCTT, R-GGTCTTGTTGATGTTGCTCA  
11 IL-18: F-GACTCTTGCGTCAACTTCAAGG, R-CAGGCTGTCTTTTGTCAACGA  
12 IL-22: F-ATGAGTTTTTCCCTTATGGGGAC, R-GCTGGAAGTTGGACACCTCAA  
13 IL-33: F-TCCAACCTCAAGATTTCCCG, R-CATGCAGTAGACATGGCAGAA  
14 Fgf7: F-TTTGGAAAGAGCGACGACTT, R-GGCAGGATCCGTGTCAGTAT  
15 IL-6: F-TCTATACCACTTCACAAGTCGGA, R-GAATTGCCATTGCACAACCTCTTT  
16

17 **Histology and Immunohistochemistry.** Mouse lung tissues were routinely perfused, inflated,  
18 and fixed with 4% PFA for 4-6 hrs at 4 degrees and cryosections (8 $\mu$ m) and paraffin sections  
19 (7 $\mu$ m) were used for histology and IF analysis. Cultured colonies from organoids were fixed  
20 with 4% PFA for 2-4 hrs at room temperature followed by immobilization with Histogel  
21 (Thermo Scientific) for paraffin embedding. Sectioned lung tissues or colonies were stained  
22 with hematoxylin and eosin (H&E) or immunostained: after antigen retrieval with citric acid  
23 (0.01M, pH 6.0), blocking was performed with 5% normal donkey serum in 0.2% Triton-  
24 X/PBS at room temperature for 1hr. Primary antibodies were incubated overnight at 4°C at the  
25 indicated dilutions: goat anti-SP-C (1:200, Santa Cruz Biotechnology Inc., sc-7706), pro-SP-  
26 C (1:300, Millipore, AB3786), rabbit anti-Ki67 (1:250, A. Menarini, MP-325-CRM1), rat anti-  
27 Ki67 (1:200, Biolegend, A16A8), rabbit anti-RFP (1:250, Rockland, 600-401379), hamster  
28 anti-PDPN (1:1000, DSHB, 8.1.1), rat anti-Cytokeratin-8 (1:300, DSHB, TROMA-I), rabbit  
29 anti-Claudin-4 (1:200, Thermo Fisher Scientific, 36-4800), rabbit anti-Hopx (1:100, Santa  
30 Cruz Biotechnology Inc., sc-30216), rabbit anti-Aqp5 (1:200, Alomone Labs, AQP5-005),  
31 rabbit anti-Caveolin-1 (1:500, Cell Signaling, #3267), and mouse anti-HTII-280 (1:200,  
32 Terrace Biotechnology, TB-27AHT2-280). Alexa Fluor-coupled secondary antibodies (1:500,  
33 Invitrogen) were incubated at room temperature for 60 min. After antibody staining, nuclei

1 were stained with DAPI (1:1000, Sigma) and sections were embedded in Vectashield (Vector  
2 Labs). Fluorescence images were acquired using a confocal microscope (Leica TCS SP5). All  
3 the images were further processed with Fiji software.

4  
5 **Statistical Analysis.** Statistical methods relevant to each figure are outlined in the figure  
6 legend. Statistical analyzes were performed with Prism software package version 7.0  
7 (GraphPad). *P* values were calculated using two-tailed unpaired or paired Student's *t* test.  
8 Sample size for animal experiments was determined based upon pilot experiments. Mice cohort  
9 size was designed to be sufficient to enable accurate determination of statistical significance.  
10 No animals were excluded from the statistical analysis. Mice were randomly assigned to  
11 treatment or control groups, while ensuring inclusion criteria based on gender and age. Animal  
12 studies were not performed in a blinded fashion. The number of animals shown in each  
13 figure is indicated in the legends as  $n = x$  mice per group. Data shown are either representative  
14 of three or more independent experiments, or combined from three or more independent  
15 experiments as noted and analyzed as mean  $\pm$  SEM.

16  
17 **Cell Counting and Image Analysis.** Sections included in cell scoring analysis for lung tissue  
18 were acquired using Leica TCS SP5 confocal microscope. At least five different sections  
19 including at least 10 alveolar regions from three individual mice per group were used. Cell  
20 counts were performed on ImageJ using the 'Cell Counter' plug-in and the performer was  
21 blinded to the specimen genotype and condition. At least two step sections (30um apart) per  
22 individual well were used for quantification of AT1 or AT2 cells.

23  
24 **ATAC-seq analysis.** The ATAC-seq assay was performed on 50,000 FACS-purified cells as  
25 previously described (Buenrostro et al., 2015). In brief, two biological independent samples  
26 were used for ATAC-seq experiment. 5 mice were pooled for *Il1rl1*<sup>+</sup>AT2 cells and 1 mouse  
27 was used for bulk AT2 cells per group. Purified cells were lysed in ATAC lysis buffer for 5  
28 min to get nuclei and then transposed with Tn5 transposase (Illumina) for 30 min. Fractionated  
29 DNA was used for amplification and library preparation according to manufacturer's  
30 guidelines (Illumina) and 150 bp-paired end sequencing was performed by pooling two  
31 samples of *Il1rl1*<sup>+</sup>AT2 and bulk AT2 cells, respectively, in one lane of the Illumina HiSeq 4000  
32 platform. The quality of the generated sequencing data was checked using the FastQC program,  
33 followed by filtering of adaptor and/or overrepresented sequences using Trimmomatic (Bolger  
34 et al., 2014). Filtered reads were next mapped to the mouse primary genome assembly

1 (mm9/GRCm38) using STAR (Dobin et al., 2013), with parameters –  
2 outFilterMatchNminOverLread 0.4 –outFilterScoreMinOverLread 0.4, and a GTF annotation  
3 file of the latest mouse assembly (GCA\_000001635.8) downloaded from ENSEMBL ftp.  
4 Duplicate reads were flagged and removed using MarkDuplicates from Picard tools.  
5 MACS2(Feng et al., 2012) callpeak was used for ATAC-seq peak calling of the *Il1r1*<sup>+</sup>AT2 and  
6 bulk AT2 samples, using the options –nomodel –shift -100 –extsize 200. Differentially enriched  
7 peaks in *Il1r1*<sup>+</sup>AT2 and bulk AT2 populations were next inferred using the MACS2 bdgdiff  
8 with a log<sub>10</sub> likelihood ratio score cutoff of 10. ATAC-seq heatmaps were plotted using  
9 deepTools2 (Ramirez et al., 2016). Annotation of ATAC-seq enriched peaks overlapping with  
10 promoter and other gene regions was performed using the ChIPseeker R/Bioconductor package,  
11 together with GO enrichment and pathway analyzes (Yu et al., 2015). Finally, motif  
12 identification was performed using the findMotifsGenome.pl program of the HOMER software  
13 (Heinz et al., 2010).

14

15 **scRNA-seq Library Preparation and Sequencing.** Established organoids of control or IL-  
16 1β-treatment were incubated with dispase (BD Bioscience) for 30-60min. Then, cells were  
17 dissociated with TripLE (Gibco) for 5min, followed by washing with buffer (PBS/0.01% BSA).  
18 For *SPC lineage*-labeled cells, CD45<sup>-</sup>CD31<sup>-</sup>EpCAM<sup>+</sup>Tomato<sup>+</sup> cells were sorted at specific  
19 time points (at day 14 and day 28 post damage) from PBS or Bleomycin-treated mice (2 mice  
20 were pooled for each experiment). For non-lineage-labeled cells isolated from *SPC*-  
21 *Cre*<sup>ERT2</sup>;*R26R*<sup>tdTomato</sup> mice in parallel with experiment of *SPC* lineage-labeled cells, we  
22 combined the cells of EpCAM<sup>+</sup>Tomato<sup>-</sup> and EpCAM<sup>-</sup> population with a ratio of 2:1,  
23 respectively. The resulting cell suspension (~110,000 cells each) were submitted as separate  
24 samples to be barcoded for the droplet-encapsulation single- cell RNA-seq experiments using  
25 the Chromium Controller (10X Genomics). Single cell cDNA synthesis, amplification and  
26 sequencing libraries were generated using the Single Cell 3' Reagent Kit as per the 10x  
27 Genomics protocol. Libraries were multiplexed so that 2 libraries were sequenced per single  
28 lane of HiSeq 4000 using the following parameters: Read1: 26 cycles, i7: 8 cycles, i5: 0 cycles;  
29 Read2: 98 cycles to generate 75bp paired end reads.

30

31 **Alignment, quantification and quality control of single cell RNA sequencing data.**

32 Droplet-based sequencing data was aligned and quantified using the Cell Ranger Single-Cell  
33 Software Suite (version 2.0.2, 10x Genomics Inc) using the *Mus musculus* genome (GRCm38)  
34 (official Cell Ranger reference, version 1.2.0). Cells were filtered by custom cutoff (more than

1 500 and less than 7000 detected genes, more than 2000 UMI count) to remove potential empty  
2 droplets and doublets. Downstream analysis included data normalisation, highly variable gene  
3 detection, log transformation, principal component analysis, neighbourhood graph generation  
4 and Louvain graph-based clustering, which was done by python package scanpy (version 1.3.6)  
5 (Wolf et al., 2018) using default parameters.

### 6 **Excluding stromal cells and contaminated cells in scRNA-seq analysis of organoids and**

### 7 **SPC lineage-tracing after bleomycin injury.** For scRNA-seq analysis of organoids, we

8 excluded the cluster of EpCAM<sup>-</sup> cells of stromal cells we put together with AT2 cells in culture.

9 For *in vivo* scRNA-seq analysis of AT2 cells after bleomycin injury, we excluded non-

10 epithelial cells and ciliated cells based on marker gene expression. Although cells were sorted

11 based on the expression of EpCAM, CD31, CD45, and Tomato before scRNA-seq, 255

12 contaminating cells among 12514 cells captured were observed in the initial droplet dataset.

13 These comprised: 214 ciliated cells expressing *Foxj1*, *Wnt7b*, and *Cd24a*; 16 mesenchyme cells

14 expressing *Vcam1*, *Acta2*, *Des*, and *Pdgfra*; 25 immune cells expressing *Ptprc* (CD45), *Tyrobp*,

15 *Il2rg*, and *Lck*. Each of these cell populations was identified by an initial round of unsupervised

16 Louvain graph-based clustering analysis as they formed extremely distinct clusters and then

17 removed. For scRNA-seq analysis of *in vivo* non-lineage-labeled cells, we excluded the doublet

18 cluster of cells expressing both EpCAM<sup>+</sup>CD45<sup>+</sup> (1125 cells among 14017 cells).

19  
20

21 **Doublet Exclusion.** To exclude doublets from single-cell RNA sequencing data, we applied

22 scrublet algorithm per sample to calculate scrublet-predicted doublet score per cell with

23 following parameters: `sim_doublet_ratio = 2`; `n_neighbors=30`; `expected_doublet_rate= 0.1`.

24 Any cell with scrublet score  $> 0.7$  was flagged as doublet. To propagate the doublet detection

25 into potential false-negatives from scrublet analysis, we over-clustered the dataset

26 (*sc.tl.louvain* function from scanpy package version 1.3.4; `resolution = 20`), and calculated the

27 average doublet score within each cluster. Any cluster with averaged scrublet score  $> 0.6$  was

28 flagged as a doublet cluster. All remaining cell clusters were further examined to detect

29 potential false-negatives from scrublet analysis according to the following criteria: (1)

30 Expression of marker genes from two distinct cell types which are unlikely according to prior

31 knowledge, (2) higher number of UMI counts.

32

33 **Pseudotime Analysis.** All data contained within our processed Seurat object for the wildtype

34 data set was converted to the AnnData format for pseudotime analysis in Scanpy (version

1 1.3.6). We recalculated  $k$ -nearest neighbors at  $k = 15$ . Pseudotime was calculated using  
2 Scanpy's partitioned-based graph abstraction function, PAGA. Diffusion pseudotime was  
3 performed using Scanpy's DPT function with default parameters.

4

5

## 1 **References**

- 2 Adams, T.S., Schupp, J.C., Poli, S., Ayaub, E.A., Neumark, N., Ahangari, F., Chu, S.G.,  
3 Raby, B.A., DeLuliis, G., Januszyk, M., *et al.* (2019). Single Cell RNA-seq reveals ectopic  
4 and aberrant lung resident cell populations in Idiopathic Pulmonary Fibrosis. bioRxiv  
5 <https://doi.org/10.1101/759902>.
- 6 Adamson, I.Y., and Bowden, D.H. (1974). The type 2 cell as progenitor of alveolar epithelial  
7 regeneration. A cytodynamic study in mice after exposure to oxygen. *Lab Invest* 30, 35-42.
- 8 Barkauskas, C.E., Crouce, M.J., Rackley, C.R., Bowie, E.J., Keene, D.R., Stripp, B.R.,  
9 Randell, S.H., Noble, P.W., and Hogan, B.L. (2013). Type 2 alveolar cells are stem cells in  
10 adult lung. *J Clin Invest* 123, 3025-3036.
- 11 Bolger, A.M., Lohse, M., and Usadel, B. (2014). Trimmomatic: a flexible trimmer for  
12 Illumina sequence data. *Bioinformatics* 30, 2114-2120.
- 13 Buenrostro, J.D., Wu, B., Chang, H.Y., and Greenleaf, W.J. (2015). ATAC-seq: A Method  
14 for Assaying Chromatin Accessibility Genome-Wide. *Curr Protoc Mol Biol* 109, 21 29 21-  
15 29.
- 16 Chen, F., Liu, Z., Wu, W., Rozo, C., Bowdridge, S., Millman, A., Van Rooijen, N., Urban,  
17 J.F., Jr., Wynn, T.A., and Gause, W.C. (2012). An essential role for TH2-type responses in  
18 limiting acute tissue damage during experimental helminth infection. *Nat Med* 18, 260-266.
- 19 Conway, E.M., Pikor, L.A., Kung, S.H., Hamilton, M.J., Lam, S., Lam, W.L., and  
20 Bennewith, K.L. (2016). Macrophages, Inflammation, and Lung Cancer. *Am J Respir Crit*  
21 *Care Med* 193, 116-130.
- 22 Dang, C.V., Kim, J.W., Gao, P., and Yuste, J. (2008). The interplay between MYC and HIF  
23 in cancer. *Nat Rev Cancer* 8, 51-56.
- 24 Dobin, A., Davis, C.A., Schlesinger, F., Drenkow, J., Zaleski, C., Jha, S., Batut, P., Chaisson,  
25 M., and Gingeras, T.R. (2013). STAR: ultrafast universal RNA-seq aligner. *Bioinformatics*  
26 29, 15-21.
- 27 Endo, T., Nakamura, J., Sato, Y., Asada, M., Yamada, R., Takase, M., Takaori, K., Oguchi,  
28 A., Iguchi, T., Higashi, A.Y., *et al.* (2015). Exploring the origin and limitations of kidney  
29 regeneration. *J Pathol* 236, 251-263.
- 30 Feng, J., Liu, T., Qin, B., Zhang, Y., and Liu, X.S. (2012). Identifying ChIP-seq enrichment  
31 using MACS. *Nat Protoc* 7, 1728-1740.
- 32 Finn, J., Sottoriva, K., Pajcini, K.V., Kitajewski, J.K., Chen, C., Zhang, W., Malik, A.B., and  
33 Liu, Y. (2019). Dlk1-Mediated Temporal Regulation of Notch Signaling Is Required for

1 Differentiation of Alveolar Type II to Type I Cells during Repair. *Cell Rep* 26, 2942-2954  
2 e2945.

3 Fortier, M.A., Krishnaswamy, K., Danyod, G., Boucher-Kovalik, S., and Chapdalaine, P.  
4 (2008). A postgenomic integrated view of prostaglandins in reproduction: implications for  
5 other body systems. *J Physiol Pharmacol* 59 *Suppl 1*, 65-89.

6 Ganguly, K., Martin, T.M., Concel, V.J., Upadhyay, S., Bein, K., Brant, K.A., George, L.,  
7 Mitra, A., Thimraj, T.A., Fabisiak, J.P., *et al.* (2014). Secreted phosphoprotein 1 is a  
8 determinant of lung function development in mice. *Am J Respir Cell Mol Biol* 51, 637-651.

9 Garayoa, M., Martinez, A., Lee, S., Pio, R., An, W.G., Neckers, L., Trepel, J., Montuenga,  
10 L.M., Ryan, H., Johnson, R., *et al.* (2000). Hypoxia-inducible factor-1 (HIF-1) up-regulates  
11 adrenomedullin expression in human tumor cell lines during oxygen deprivation: a possible  
12 promotion mechanism of carcinogenesis. *Mol Endocrinol* 14, 848-862.

13 Habermann, A.C., Gutierrez, A.J., Bui, L.T., Yahn, S.L., Winters, L.I., Calvi, C.L., Peter, L.,  
14 Chung, M.I., Taylor, C.J., Jetter, C., *et al.* (2019). Single-cell RNA-sequencing reveals  
15 profibrotic roles of distinct epithelial and mesenchymal lineages in pulmonary fibrosis.  
16 bioRxiv <https://doi.org/10.1101/753806>.

17 Haghverdi, L., Buttner, M., Wolf, F.A., Buettner, F., and Theis, F.J. (2016). Diffusion  
18 pseudotime robustly reconstructs lineage branching. *Nat Methods* 13, 845-848.

19 Hasegawa, K., Sato, A., Tanimura, K., Uemasu, K., Hamakawa, Y., Fuseya, Y., Sato, S.,  
20 Muro, S., and Hirai, T. (2017). Fraction of MHCII and EpCAM expression characterizes  
21 distal lung epithelial cells for alveolar type 2 cell isolation. *Respir Res* 18, 150.

22 Heinz, S., Benner, C., Spann, N., Bertolino, E., Lin, Y.C., Laslo, P., Cheng, J.X., Murre, C.,  
23 Singh, H., and Glass, C.K. (2010). Simple combinations of lineage-determining transcription  
24 factors prime cis-regulatory elements required for macrophage and B cell identities. *Mol Cell*  
25 38, 576-589.

26 Hogan, B.L., Barkauskas, C.E., Chapman, H.A., Epstein, J.A., Jain, R., Hsia, C.C., Niklason,  
27 L., Calle, E., Le, A., Randell, S.H., *et al.* (2014). Repair and regeneration of the respiratory  
28 system: complexity, plasticity, and mechanisms of lung stem cell function. *Cell Stem Cell* 15,  
29 123-138.

30 Hsu, Y.C., Li, L., and Fuchs, E. (2014). Emerging interactions between skin stem cells and  
31 their niches. *Nat Med* 20, 847-856.

32 Katsura, H., Kobayashi, Y., Tata, P.R., and Hogan, B.L.M. (2019). IL-1 and TNFalpha  
33 Contribute to the Inflammatory Niche to Enhance Alveolar Regeneration. *Stem Cell Reports*  
34 12, 657-666.



- 1 Klose, C.S., and Artis, D. (2016). Innate lymphoid cells as regulators of immunity,  
2 inflammation and tissue homeostasis. *Nat Immunol* *17*, 765-774.
- 3 Kobayashi, Y., Tata, A., Konkimalla, A., Katsura, H., Lee, F.R., Ou, J., Banovich, E.N.,  
4 Kropski, A.J., and Tata, R.P. (2019). Persistence of a novel regeneration-associated  
5 transitional cell state in pulmonary fibrosis. *BioRxiv* <https://doi.org/10.1101/855155>.
- 6 Kotton, D.N., and Morrissey, E.E. (2014). Lung regeneration: mechanisms, applications and  
7 emerging stem cell populations. *Nat Med* *20*, 822-832.
- 8 Kuriakose, T., and Kanneganti, T.D. (2018). ZBP1: Innate Sensor Regulating Cell Death and  
9 Inflammation. *Trends Immunol* *39*, 123-134.
- 10 Lechner, A.J., Driver, I.H., Lee, J., Conroy, C.M., Nagle, A., Locksley, R.M., and Rock, J.R.  
11 (2017). Recruited Monocytes and Type 2 Immunity Promote Lung Regeneration following  
12 Pneumonectomy. *Cell Stem Cell* *21*, 120-134 e127.
- 13 Lee, J.H., Bhang, D.H., Beede, A., Huang, T.L., Stripp, B.R., Bloch, K.D., Wagers, A.J.,  
14 Tseng, Y.H., Ryeom, S., and Kim, C.F. (2014). Lung stem cell differentiation in mice  
15 directed by endothelial cells via a BMP4-NFATc1-thrombospondin-1 axis. *Cell* *156*, 440-  
16 455.
- 17 Lee, J.H., Tammela, T., Hofree, M., Choi, J., Marjanovic, N.D., Han, S., Canner, D., Wu, K.,  
18 Paschini, M., Bhang, D.H., *et al.* (2017). Anatomically and Functionally Distinct Lung  
19 Mesenchymal Populations Marked by *Lgr5* and *Lgr6*. *Cell* *170*, 1149-1163 e1112.
- 20 Li, L., and Clevers, H. (2010). Coexistence of quiescent and active adult stem cells in  
21 mammals. *Science* *327*, 542-545.
- 22 Ligresti, G., Aplin, A.C., Dunn, B.E., Morishita, A., and Nicosia, R.F. (2012). The acute  
23 phase reactant orosomucoid-1 is a bimodal regulator of angiogenesis with time- and context-  
24 dependent inhibitory and stimulatory properties. *PLoS One* *7*, e41387.
- 25 Lindemans, C.A., Calafiore, M., Mertelsmann, A.M., O'Connor, M.H., Dudakov, J.A., Jenq,  
26 R.R., Velardi, E., Young, L.F., Smith, O.M., Lawrence, G., *et al.* (2015). Interleukin-22  
27 promotes intestinal-stem-cell-mediated epithelial regeneration. *Nature* *528*, 560-564.
- 28 Madisen, L., Zwingman, T.A., Sunkin, S.M., Oh, S.W., Zariwala, H.A., Gu, H., Ng, L.L.,  
29 Palmiter, R.D., Hawrylycz, M.J., Jones, A.R., *et al.* (2010). A robust and high-throughput Cre  
30 reporting and characterization system for the whole mouse brain. *Nat Neurosci* *13*, 133-140.
- 31 Mantovani, A., Allavena, P., Sica, A., and Balkwill, F. (2008). Cancer-related inflammation.  
32 *Nature* *454*, 436-444.
- 33 Martis, P.C., Whitsett, J.A., Xu, Y., Perl, A.K., Wan, H., and Ikegami, M. (2006).  
34 C/EBPalpha is required for lung maturation at birth. *Development* *133*, 1155-1164.

- 1 Maynard, A., McCoach, C.E., Julia K. Rotow, L.H., Haderk, F., Kerr, L., Yu, E.A., Schenk,  
2 E.L., Tan, W., Zee, A., Tan, M., *et al.* (2019). Heterogeneity and targeted therapy-induced  
3 adaptations in lung cancer revealed by longitudinal single-cell RNA sequencing. bioRxiv doi:  
4 <https://doi.org/10.1101/2019.12.08.868828>.
- 5 Medzhitov, R. (2008). Origin and physiological roles of inflammation. *Nature* 454, 428-435.
- 6 Minoo, P., Su, G., Drum, H., Bringas, P., and Kimura, S. (1999). Defects in  
7 tracheoesophageal and lung morphogenesis in Nkx2.1(-/-) mouse embryos. *Dev Biol* 209, 60-  
8 71.
- 9 Miossec, P., and Kolls, J.K. (2012). Targeting IL-17 and TH17 cells in chronic inflammation.  
10 *Nat Rev Drug Discov* 11, 763-776.
- 11 Misharin, A.V., Morales-Nebreda, L., Reyfman, P.A., Cuda, C.M., Walter, J.M., McQuattie-  
12 Pimentel, A.C., Chen, C.I., Anekalla, K.R., Joshi, N., Williams, K.J.N., *et al.* (2017).  
13 Monocyte-derived alveolar macrophages drive lung fibrosis and persist in the lung over the  
14 life span. *J Exp Med* 214, 2387-2404.
- 15 Moll, H.P., Pranz, K., Musteanu, M., Grabner, B., Hruschka, N., Mohrherr, J., Aigner, P.,  
16 Stiedl, P., Brcic, L., Laszlo, V., *et al.* (2018). Afatinib restrains K-RAS-driven lung  
17 tumorigenesis. *Sci Transl Med* 10.
- 18 Nabhan, A.N., Brownfield, D.G., Harbury, P.B., Krasnow, M.A., and Desai, T.J. (2018).  
19 Single-cell Wnt signaling niches maintain stemness of alveolar type 2 cells. *Science* 359,  
20 1118-1123.
- 21 Naik, S., Larsen, S.B., Cowley, C.J., and Fuchs, E. (2018). Two to Tango: Dialog between  
22 Immunity and Stem Cells in Health and Disease. *Cell* 175, 908-920.
- 23 Naik, S., Larsen, S.B., Gomez, N.C., Alaverdyan, K., Sendoel, A., Yuan, S., Polak, L.,  
24 Kulukian, A., Chai, S., and Fuchs, E. (2017). Inflammatory memory sensitizes skin epithelial  
25 stem cells to tissue damage. *Nature* 550, 475-480.
- 26 Olsson, A., Venkatasubramanian, M., Chaudhri, V.K., Aronow, B.J., Salomonis, N., Singh,  
27 H., and Grimes, H.L. (2016). Single-cell analysis of mixed-lineage states leading to a binary  
28 cell fate choice. *Nature* 537, 698-702.
- 29 Ramirez, F., Ryan, D.P., Gruning, B., Bhardwaj, V., Kilpert, F., Richter, A.S., Heyne, S.,  
30 Dundar, F., and Manke, T. (2016). deepTools2: a next generation web server for deep-  
31 sequencing data analysis. *Nucleic Acids Res* 44, W160-165.
- 32 Riemondy, K.A., Jansing, N.L., Jiang, P., Redente, E.F., Gillen, A.E., Fu, R., Miller, A.J.,  
33 Spence, J.R., Gerber, A.N., Hesselberth, J.R., *et al.* (2019). Single cell RNA sequencing

1 identifies TGFbeta as a key regenerative cue following LPS-induced lung injury. *JCI Insight*  
2 5.  
3 Rindler, T.N., Stockman, C.A., Filuta, A.L., Brown, K.M., Snowball, J.M., Zhou, W.,  
4 Veldhuizen, R., Zink, E.M., Dautel, S.E., Clair, G., *et al.* (2017). Alveolar injury and  
5 regeneration following deletion of ABCA3. *JCI Insight* 2.  
6 Robson, M.J., Zhu, C.B., Quinlan, M.A., Botschner, D.A., Baganz, N.L., Lindler, K.M.,  
7 Thome, J.G., Hewlett, W.A., and Blakely, R.D. (2016). Generation and Characterization of  
8 Mice Expressing a Conditional Allele of the Interleukin-1 Receptor Type 1. *PLoS One* 11,  
9 e0150068.  
10 Rock, J.R., Barkauskas, C.E., Cronce, M.J., Xue, Y., Harris, J.R., Liang, J., Noble, P.W., and  
11 Hogan, B.L. (2011). Multiple stromal populations contribute to pulmonary fibrosis without  
12 evidence for epithelial to mesenchymal transition. *Proc Natl Acad Sci U S A* 108, E1475-  
13 1483.  
14 Schonhaler, H.B., Guinea-Viniegra, J., and Wagner, E.F. (2011). Targeting inflammation by  
15 modulating the Jun/AP-1 pathway. *Ann Rheum Dis* 70 *Suppl* 1, i109-112.  
16 Semenza, G.L. (2012). Hypoxia-inducible factors in physiology and medicine. *Cell* 148, 399-  
17 408.  
18 Van Keymeulen, A., Rocha, A.S., Ousset, M., Beck, B., Bouvencourt, G., Rock, J., Sharma,  
19 N., Dekoninck, S., and Blanpain, C. (2011). Distinct stem cells contribute to mammary gland  
20 development and maintenance. *Nature* 479, 189-193.  
21 Wagers, A.J., and Weissman, I.L. (2004). Plasticity of adult stem cells. *Cell* 116, 639-648.  
22 Weaver, M., Dunn, N.R., and Hogan, B.L. (2000). Bmp4 and Fgf10 play opposing roles  
23 during lung bud morphogenesis. *Development* 127, 2695-2704.  
24 Westphalen, K., Gusarova, G.A., Islam, M.N., Subramanian, M., Cohen, T.S., Prince, A.S.,  
25 and Bhattacharya, J. (2014). Sessile alveolar macrophages communicate with alveolar  
26 epithelium to modulate immunity. *Nature* 506, 503-506.  
27 Wolf, F.A., Angerer, P., and Theis, F.J. (2018). SCANPY: large-scale single-cell gene  
28 expression data analysis. *Genome Biol* 19, 15.  
29 Wolf, F.A., Hamey, F.K., Plass, M., Solana, J., Dahlin, J.S., Gottgens, B., Rajewsky, N.,  
30 Simon, L., and Theis, F.J. (2019). PAGA: graph abstraction reconciles clustering with  
31 trajectory inference through a topology preserving map of single cells. *Genome Biol* 20, 59.  
32 Wu, H., Yu, Y., Huang, H., Hu, Y., Fu, S., Wang, Z., Shi, M., Zhao, X., Yuan, J., Li, J., *et al.*  
33 (2020). Progressive Pulmonary Fibrosis Is Caused by Elevated Mechanical Tension on  
34 Alveolar Stem Cells. *Cell* 180, 107-121 e117.

1 Yu, G., Wang, L.G., and He, Q.Y. (2015). ChIPseeker: an R/Bioconductor package for ChIP  
2 peak annotation, comparison and visualization. *Bioinformatics* *31*, 2382-2383.

3 Zacharias, W.J., Frank, D.B., Zepp, J.A., Morley, M.P., Alkhaleel, F.A., Kong, J., Zhou, S.,  
4 Cantu, E., and Morrisey, E.E. (2018). Regeneration of the lung alveolus by an evolutionarily  
5 conserved epithelial progenitor. *Nature* *555*, 251-255.

6 Zeng, L., Yang, X.T., Li, H.S., Li, Y., Yang, C., Gu, W., Zhou, Y.H., Du, J., Wang, H.Y.,  
7 Sun, J.H., *et al.* (2016). The cellular kinetics of lung alveolar epithelial cells and its  
8 relationship with lung tissue repair after acute lung injury. *Respir Res* *17*, 164.

9 Zepp, J.A., Zacharias, W.J., Frank, D.B., Cavanaugh, C.A., Zhou, S., Morley, M.P., and  
10 Morrisey, E.E. (2017). Distinct Mesenchymal Lineages and Niches Promote Epithelial Self-  
11 Renewal and Myofibrogenesis in the Lung. *Cell* *170*, 1134-1148 e1110.

12 Zhang, Z., Newton, K., Kummerfeld, S.K., Webster, J., Kirkpatrick, D.S., Phu, L., Eastham-  
13 Anderson, J., Liu, J., Lee, W.P., Wu, J., *et al.* (2017). Transcription factor Etv5 is essential  
14 for the maintenance of alveolar type II cells. *Proc Natl Acad Sci U S A* *114*, 3903-3908.

15

16

17

## 1 Figures and Legends

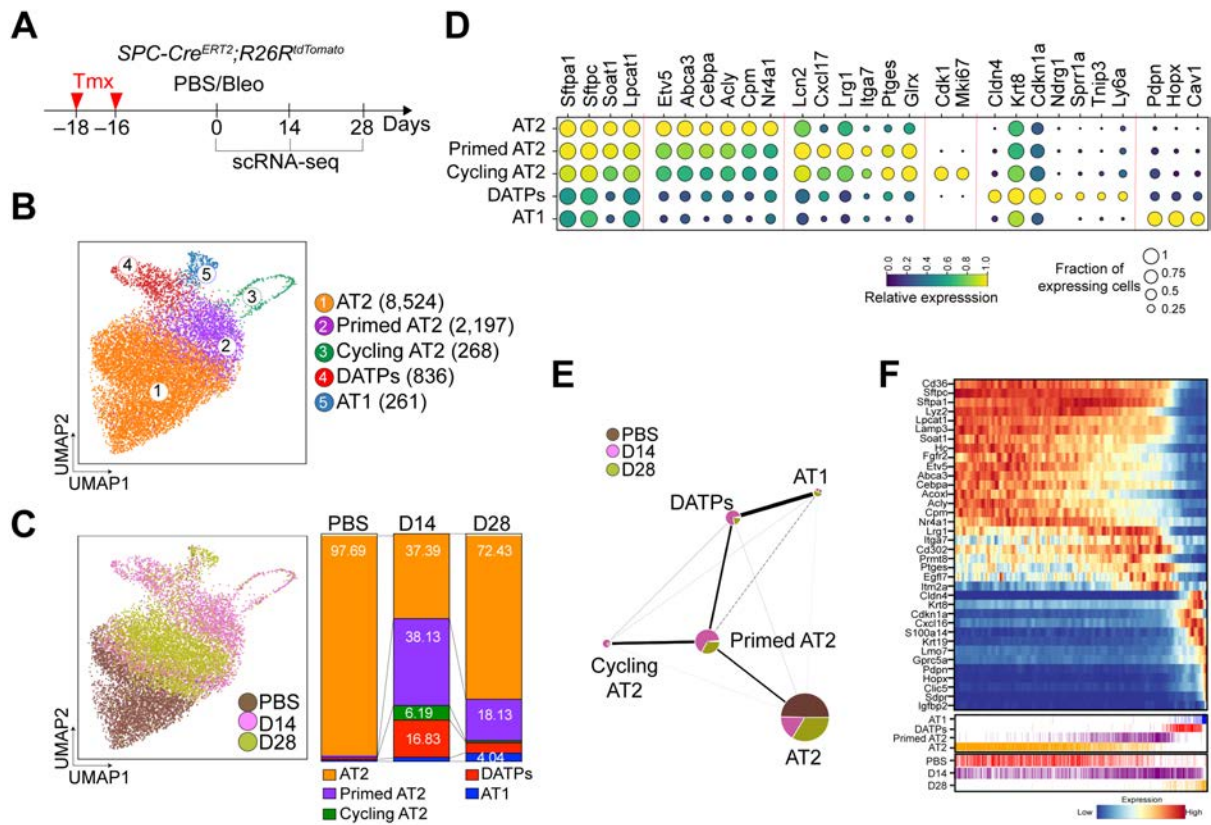

2

3 **Figure 1. scRNA-seq reveals a dynamic lineage trajectory from AT2 cells to AT1 cells**  
 4 **during alveolar regeneration after injury.**

5 **(A)** Schematics of experimental design for *SPC* lineage-labeled single cell isolation at indicated  
 6 time points after bleomycin injury.

7 **(B)** Clusters of *SPC* lineage-labeled alveolar cells (12,086) from 10xGenomics 3' single-cell  
 8 RNA sequencing (scRNA-seq) analysis visualized by UMAP, assigned by specific colors.  
 9 Number of cells in the individual cluster is depicted in the figure.

10 **(C)** Distribution of each cluster across indicated time points after injury.

11 **(D)** Gene expression of key markers in each distinctive cluster.

12 **(E)** Network topology among clusters from single cell data revealed by Partition-based graph  
 13 abstraction (PAGA). Colors indicate the proportion of each cluster by time point. Each node in  
 14 the PAGA graph represents a cluster and the weight of the lines represents the statistical  
 15 measure of connectivity between clusters.

16 **(F)** Heat map of gene expression profiles according to pseudotime trajectory. Lower color bars  
 17 indicate cell types (upper panel) and actual time (bottom panel). See also Fig. S1.

18



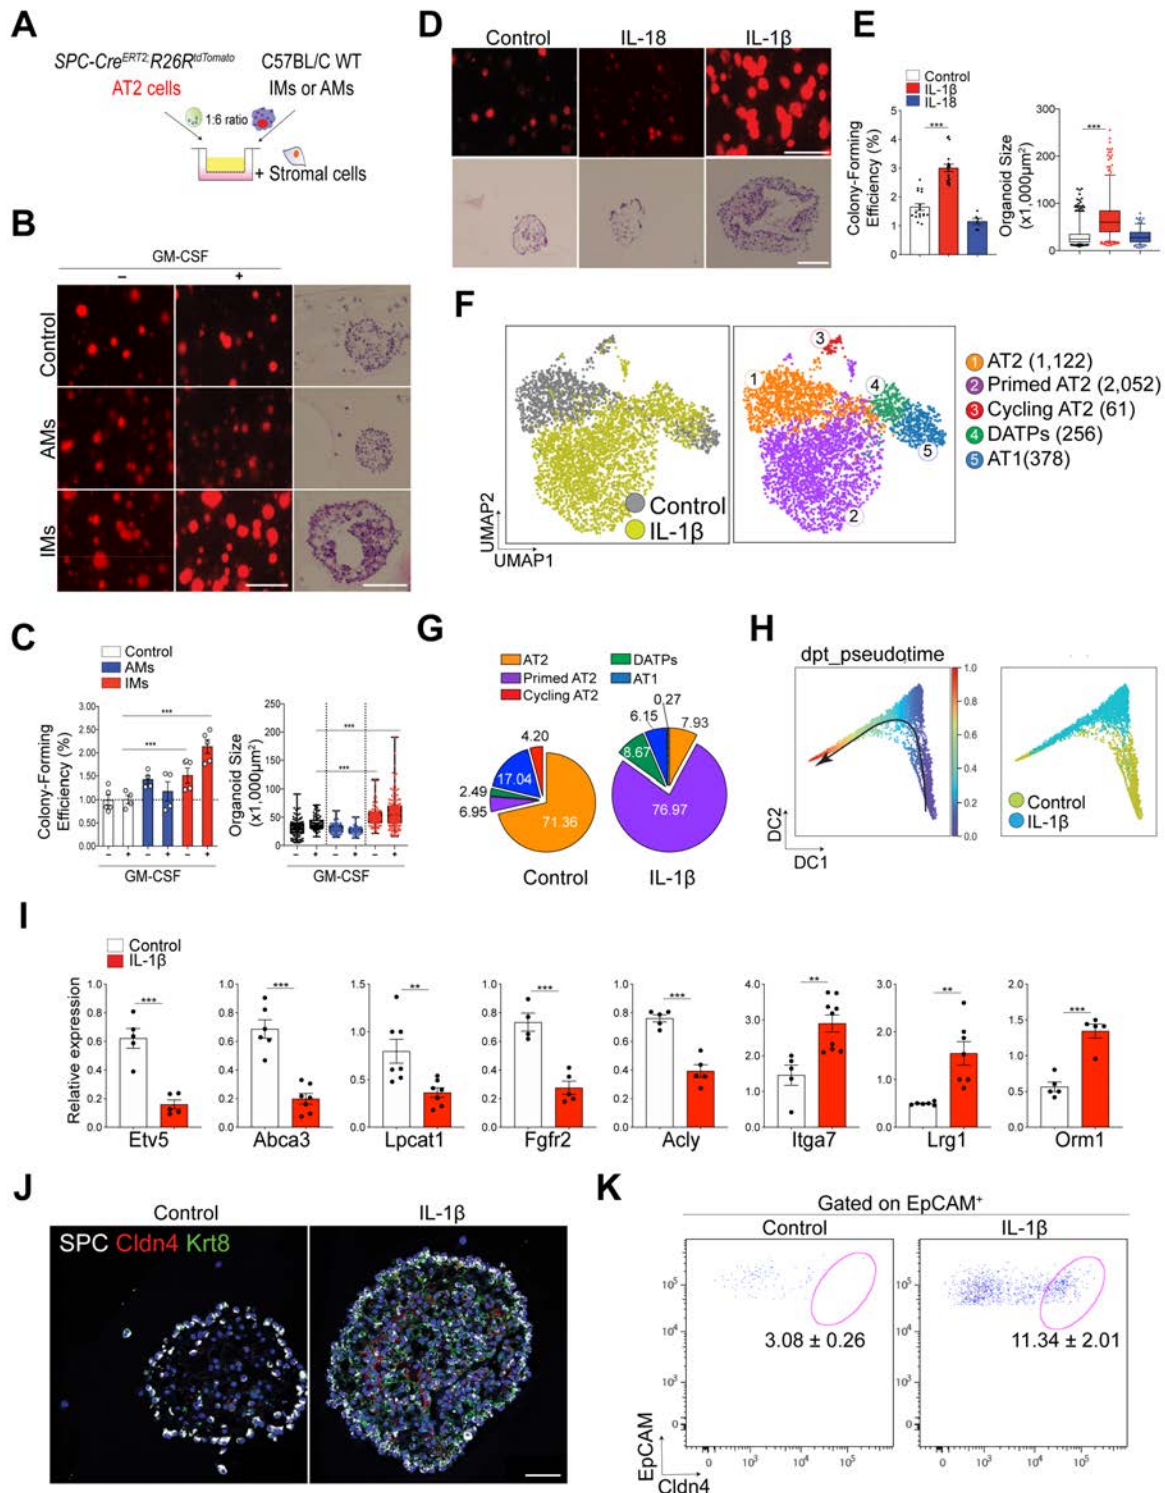

1

2 **Figure 2. IL-1 $\beta$  signaling directly promotes reprogramming of AT2 cells.**

3 (A) Schematics of organoid co-culture of *SPC* lineage-labeled AT2 cells ( $SPC^+Tomato^+$ ) with  
 4 interstitial (IMs) or alveolar macrophages (AMs) isolated from wildtype lung tissues in the  
 5 presence of stromal cells. See also Fig. S2.

- 1 **(B)** Representative fluorescent images (left and middle) and H&E (right) staining of AT2  
2 organoids. GM-CSF was added to activate macrophages. Scale bar, 1,000  $\mu\text{m}$  (left) and 50  $\mu\text{m}$   
3 (right).
- 4 **(C)** Statistical quantification of colony forming efficiency and size of organoids. Each  
5 individual dot represents one experiment from one mouse and data are presented as mean and  
6 SEM. \*\*\* $p < 0.001$ .
- 7 **(D)** Representative fluorescent images (top) and H&E staining (bottom) of primary organoids  
8 derived from *SPC* lineage-labeled AT2 cells ( $\text{SPC}^+\text{Tomato}^+$ ) treated with vehicle (PBS), IL-  
9  $1\beta$  or IL-18. Scale bar, 1,000  $\mu\text{m}$  (top) and 50  $\mu\text{m}$  (bottom).
- 10 **(E)** Quantification of colony forming efficiency and size. Data are presented as mean and SEM.
- 11 **(F)** UMAP visualization of cell clusters from scRNA-seq analysis of epithelial cells from  
12 control (1,286 cells) or IL- $1\beta$ -treated organoids (10 ng/ml, 2,584 cells). Cells were isolated at  
13 day 21 in organoid culture. Colors indicate samples and distinct cell types. Number of cells in  
14 the individual cluster is depicted in the figure. **See also Fig. S3.**
- 15 **(G)** The percentage of each cluster in total cells of control or IL- $1\beta$ -treated organoids.
- 16 **(H)** Diffusion map according to diffusion pseudotime (DPT, left) order colored by samples  
17 (right).
- 18 **(I)** qPCR analysis of genes that are upregulated (*Itga7*, *Lrg1*, *Orml1*) or downregulated (*Etv5*,  
19 *Abca3*, *Lpcat1*, *Fgfr2*, and *Acly*) in Primed AT2 cells. EpCAM<sup>+</sup> epithelial cells were isolated  
20 from organoids treated with PBS or IL- $1\beta$  at day 6 in AT2 organoid culture. Each individual  
21 dot represents one experiment and data are presented as mean  $\pm$  SEM. \*\* $p < 0.01$ , \*\*\* $p < 0.001$ .
- 22 **(J)** Representative IF images showing the generation of DATPs marked by Cldn4 and Krt8  
23 expression in AT2 organoids treated with IL- $1\beta$ : SPC (white), Cldn4 (red), Krt8 (green) and  
24 DAPI (blue). Scale bars, 50  $\mu\text{m}$ .
- 25 **(K)** Flow cytometry analysis of DATPs by gating with Cldn4 and EpCAM. Data are presented  
26 as mean  $\pm$  SEM (n=5). \*\*\* $p < 0.001$ .

27



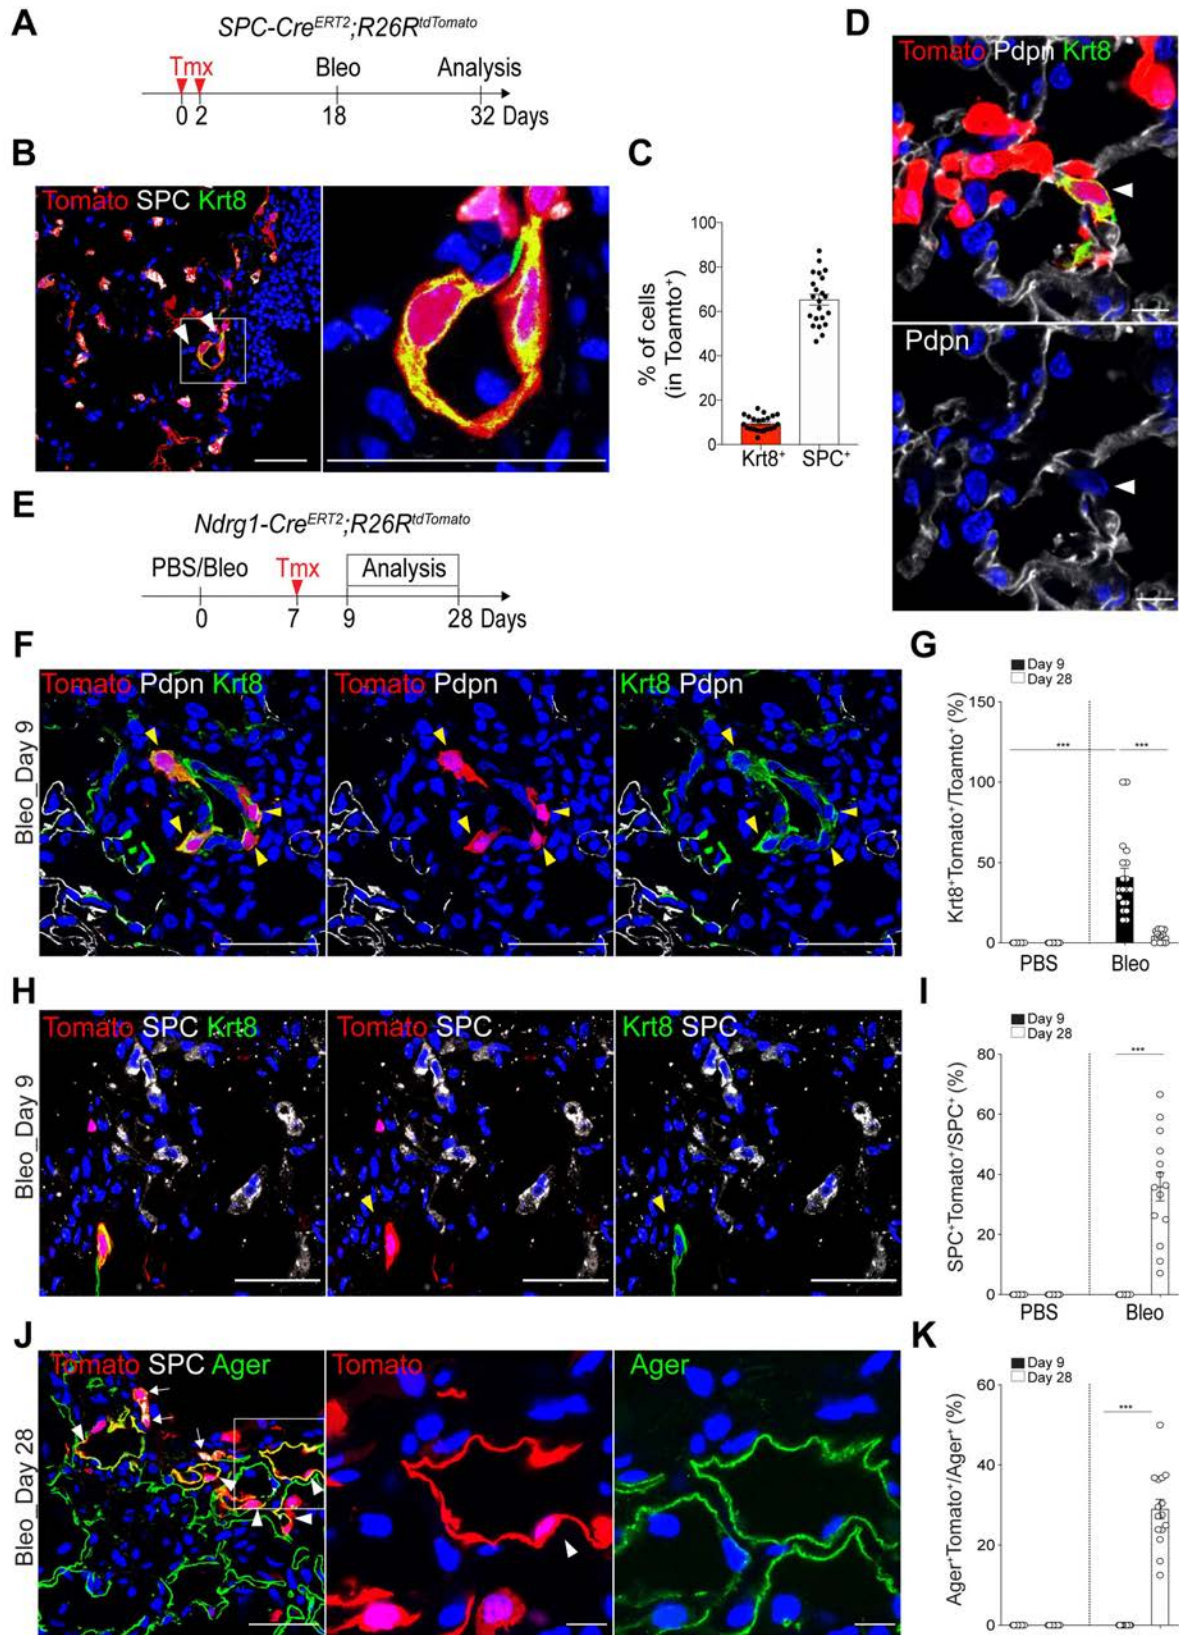

1

2 **Figure 3. Injury response-specific DATPs are derived from AT2 cells and mediate AT1**

3 **lineage differentiation.**

- 1 **(A)** Schematics of experimental design for *SPC* lineage-tracing analysis using *SPC-*  
2 *Cre<sup>ERT2</sup>;R26R<sup>tdTomato</sup>* mice at indicated time points after bleomycin injury.
- 3 **(B)** Representative IF images showing the derivation of DATPs from AT2 lineage-labeled cells  
4 at day 14 post injury: Tomato (red), SPC (white), and Krt8 (green). White boxed insets are  
5 shown on the right. Arrowhead points to lineage-labeled *Krt8<sup>+</sup>*DATPs that do not express AT2  
6 marker SPC. Scale bar, 50  $\mu$ m.
- 7 **(C)** Quantification of lineage-labeled SPC<sup>+</sup> AT2 cells or *Krt8<sup>+</sup>* DATPs at day 14 post injury.  
8 Each individual dot represents one section and data are presented as mean  $\pm$  SEM with three  
9 independent experiments (n=4).
- 10 **(D)** Representative IF images showing the derivation of DATPs from AT2 lineage-labeled cells  
11 at day 14 post injury: Tomato (red), Pdpn (white). Arrowhead points to lineage-labeled *Krt8<sup>+</sup>*  
12 DATPs that do not express AT1 marker Pdpn. Scale bar, 10  $\mu$ m.
- 13 **(E)** Experimental design for *Ndrgr1* lineage-tracing analysis using *Ndrgr1-Cre<sup>ERT2</sup>;R26R<sup>tdTomato</sup>*  
14 mice after bleomycin injury. Specific time points for tamoxifen injection and analysis are  
15 indicated. **See also Fig. S4.**
- 16 **(F)** Representative IF images showing the derivation of *Ndrgr1* lineage-labeled DATPs that are  
17 negative for AT1 marker but positive for Krt8 at day 9 post injury: Tomato (red), Pdpn (white),  
18 Krt8 (green), and DAPI (blue). Arrowhead points to lineage-labeled DATPs. Scale bar, 50  $\mu$ m.
- 19 **(G)** Statistical quantification of *Krt8<sup>+</sup>Tomato<sup>+</sup>* cells at indicated time points post PBS or  
20 bleomycin injury. Each individual dot represents one section and data are presented as mean  $\pm$   
21 SEM (n=2 PBS control, n=3 for bleomycin). \*\*\*p<0.001.
- 22 **(H)** Representative IF images showing the derivation of *Ndrgr1* lineage-labeled DATPs that are  
23 negative for AT2 marker at day 9 post injury: Tomato (red), SPC (white), Krt8 (green), and  
24 DAPI (blue). Arrowhead points to lineage-labeled DATPs. Scale bar, 50  $\mu$ m.
- 25 **(I)** Statistical quantification of lineage-labeled AT2 (SPC<sup>+</sup>Tomato<sup>+</sup>) cells at indicated time  
26 points post PBS or bleomycin injury. Each individual dot represents one section and data are  
27 presented as mean  $\pm$  SEM (n=2 PBS control, n=3 for bleomycin). \*\*\*p<0.001.
- 28 **(J)** Representative IF images showing the differentiation of *Ndrgr1* lineage-labeled AT1 and  
29 AT2 cells at day 28 after injury: Tomato (red), SPC (white), Ager (green), and DAPI (blue).  
30 Arrowhead points to lineage-labeled Ager<sup>+</sup> cells. White boxed insets (left) are shown on the  
31 right. Scale bar, 50  $\mu$ m (left) and 10  $\mu$ m (right).
- 32 **(K)** Statistical quantification of Ager<sup>+</sup>Tomato<sup>+</sup> AT1 cells at indicated time points post PBS or  
33 bleomycin injury. Each individual dot represents one section and data are presented as mean  $\pm$   
34 SEM (n=2 PBS control, n=3 for bleomycin). \*\*\*p<0.001. **See also Fig. S5.**

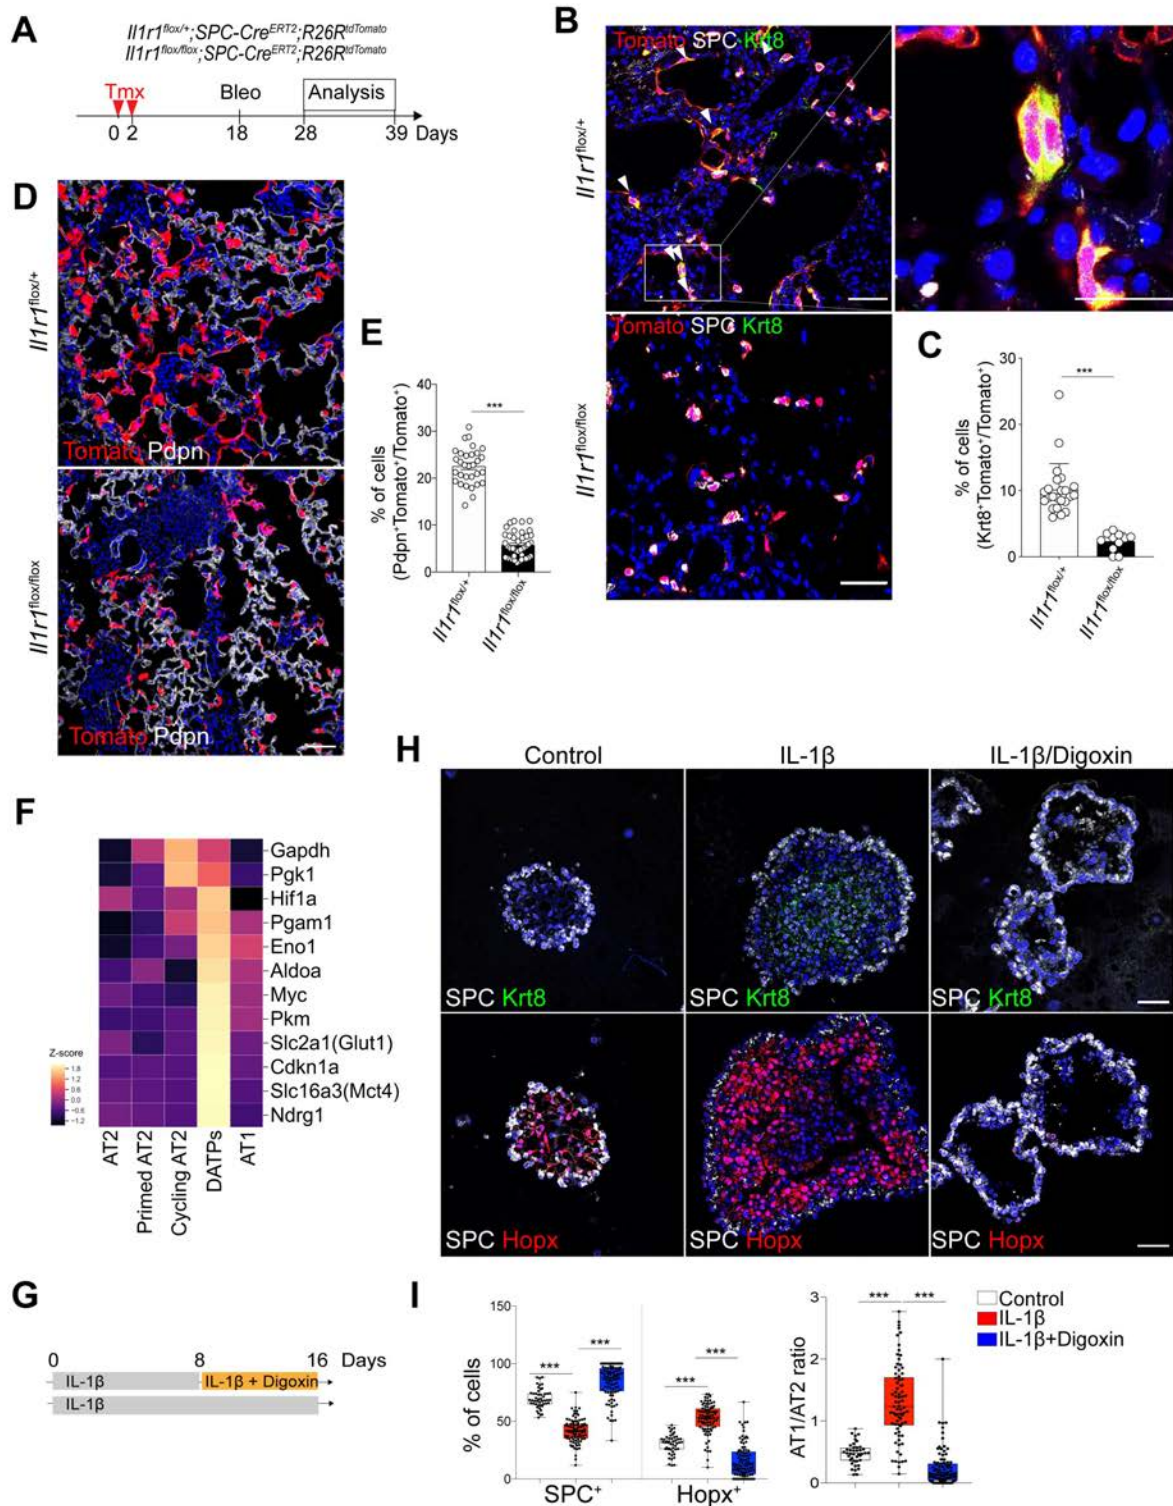

1  
 2 **Figure 4. DATPs induced by IL-1 $\beta$ -driven Hif1a signaling are essential mediators for**  
 3 **alveolar regeneration.**

4 (A) Experimental design for lineage tracing of *Il1r1*- haplodeficient or deficient AT2 cells post  
 5 bleomycin administration.



- 1 **(B)** Representative IF images showing DATPs generation from *SPC* lineage-labeled cells at  
2 day 10 post injury in the indicated genotype: Tomato (for *SPC* lineage, red), *SPC* (white), *Krt8*  
3 (*green*), and DAPI (blue). Scale bars, 50  $\mu\text{m}$ . **See also Fig. S6.**
- 4 **(C)** Quantification of lineage-labeled *Krt8*<sup>+</sup> DATPs at day 10 post injury. Each individual dot  
5 represents one section and data are presented as mean  $\pm$  SEM (n=3).
- 6 **(D)** Representative IF images showing AT1 cell differentiation from *SPC* lineage-labeled cells  
7 at day 21 post injury in the indicated genotype: Tomato (for *SPC* lineage, red), *Pdpm* (white),  
8 and DAPI (blue). Scale bars, 50  $\mu\text{m}$ .
- 9 **(E)** Quantification of lineage-labeled *Pdpm*<sup>+</sup> AT1 cells at day 21 post injury. Each individual  
10 dot represents one section and data are presented as mean  $\pm$  SEM (n=6).
- 11 **(F)** Heat map of the transcriptional profiles of genes that are associated with *Hif1a*-mediated  
12 signaling including glycolysis pathway in the subset of clusters. **See also Fig. S7.**
- 13 **(G)** Schematic of AT2 organoid culture treated with digoxin in the presence of *IL-1 $\beta$* .
- 14 **(H)** Representative IF images showing the impaired generation of DATPs and AT1 lineage in  
15 digoxin-treated organoids: *SPC* (white), *Krt8* (top, green), *Hopx* (bottom, red), and DAPI  
16 (blue). Scale bar, 50  $\mu\text{m}$ .
- 17 **(I)** Quantification of the frequency of AT2 (*SPC*<sup>+</sup>) or AT1 (*Hopx*<sup>+</sup>) cells (left) and the ratio of  
18 AT1/AT2 (right). Each individual dot represents one experiment and data are presented as  
19 mean  $\pm$  SEM. \*\*\*p<0.001. **See also Fig. S8.**

20

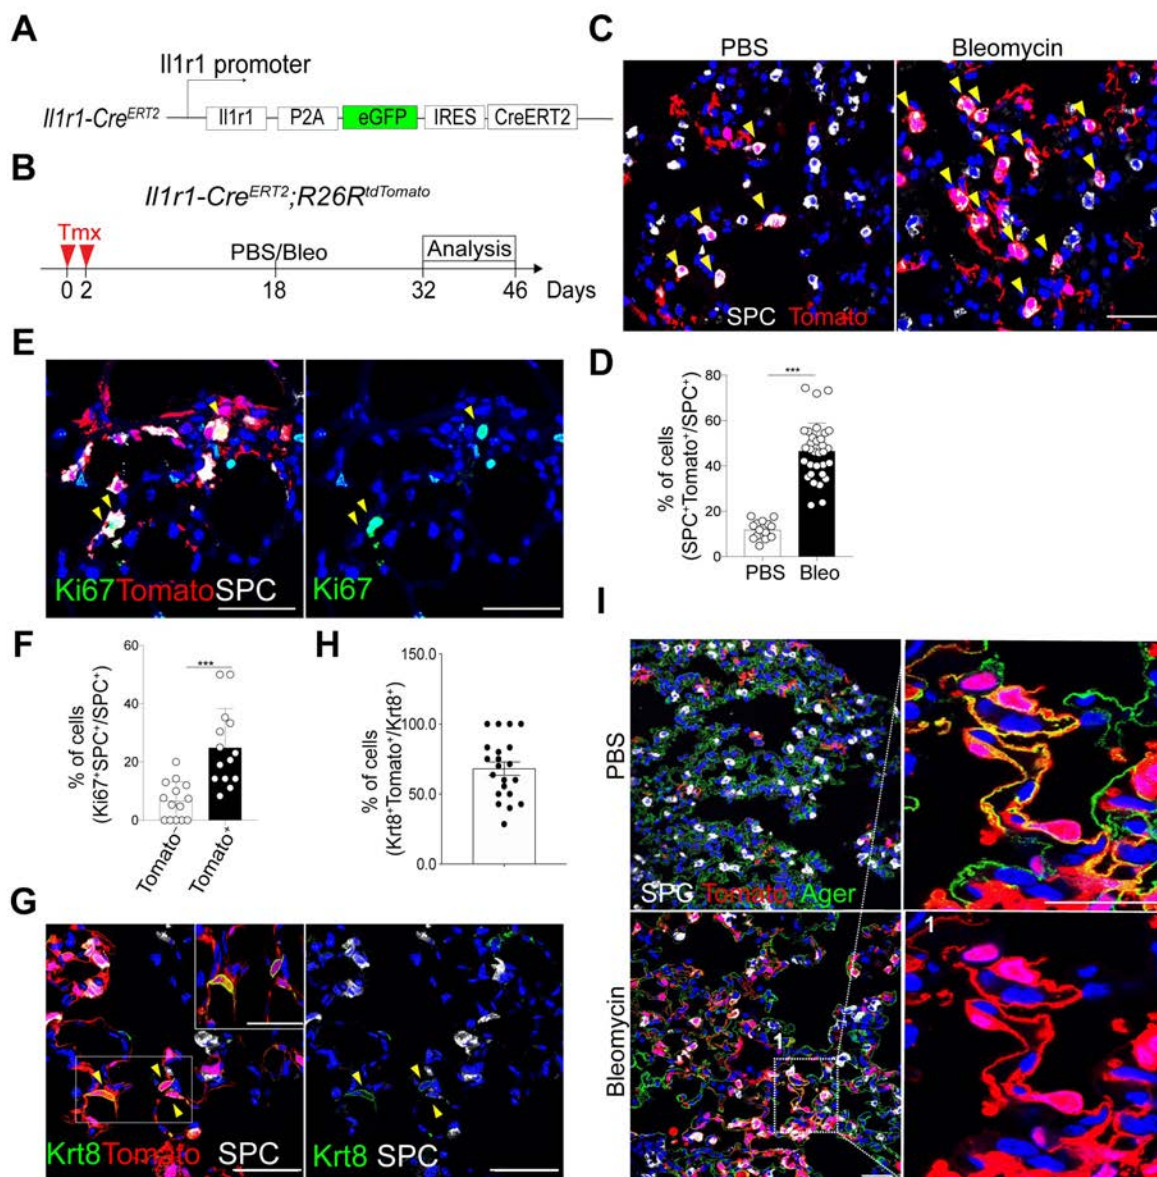

1  
2 **Figure 5. *Il1r1*<sup>+</sup>AT2 cells are distinct subsets that generate DATPs during alveolar**  
3 **regeneration after injury.**

4 **(A)** Schematic of *Il1r1-Cre*<sup>ERT2</sup> mice. See also Fig. S9.

5 **(B)** Experimental design for lineage tracing. Date for analysis is as indicated.

6 **(C)** Representative IF images showing *Il1r1* lineage-labeled AT2 cells in the lung of mice  
7 treated with control (PBS) or bleomycin at day 14 post injury: Tomato (for *Il1r1* lineage, red),  
8 SPC (white), and DAPI (blue). Arrowheads, *Il1r1* lineage-labeled SPC<sup>+</sup>AT2 cells. Scale bars,  
9 50  $\mu$ m.

10 **(D)** Quantification of *Il1r1* lineage-labeled SPC<sup>+</sup> AT2 cells in (C). Each individual dot  
11 represents one section and data are presented as mean  $\pm$  SEM with three independent  
12 experiments. \*\*\*p<0.001.

- 1 **(E)** Representative IF images showing Ki67<sup>+</sup> cells in lineage-labeled or –unlabeled SPC<sup>+</sup> AT2  
2 cells at day 14 post injury: Tomato (for *Il1r1* lineage, red), SPC (white), Ki67 (green), and  
3 DAPI (blue). Arrowheads, *Il1r1* lineage-labeled proliferating AT2 cells. Scale bars, 50  $\mu$ m.
- 4 **(F)** Quantification of Ki67<sup>+</sup> AT2 cells in lineage-labeled or -unlabeled SPC<sup>+</sup> cells. Each  
5 individual dot represents one section and data are presented as mean  $\pm$  SEM with three  
6 independent experiments. \*\*\*p<0.001.
- 7 **(G)** Representative IF images showing *Il1r1* lineage-labeled DATPs at day 28 post injury:  
8 Tomato (for *Il1r1* lineage, red), Krt8 (green), and DAPI (blue). Arrowheads, *Il1r1* lineage-  
9 labeled DATPs. Insets (left) show high-power view (right top). Scale bars, 50 $\mu$ m.
- 10 **(H)** Quantification of *Il1r1* lineage-labeled DATPs at day 14 post bleomycin injury. Each  
11 individual dot represents one section and data are presented as mean  $\pm$  SEM with three  
12 independent experiments.
- 13 **(I)** Representative IF images showing *Il1r1* lineage-labeled AT1 cells at day 28 post injury:  
14 Tomato (for *Il1r1* lineage, red), SPC (white), Ager (green), and DAPI (blue). Scale bars, 50 $\mu$ m.
- 15

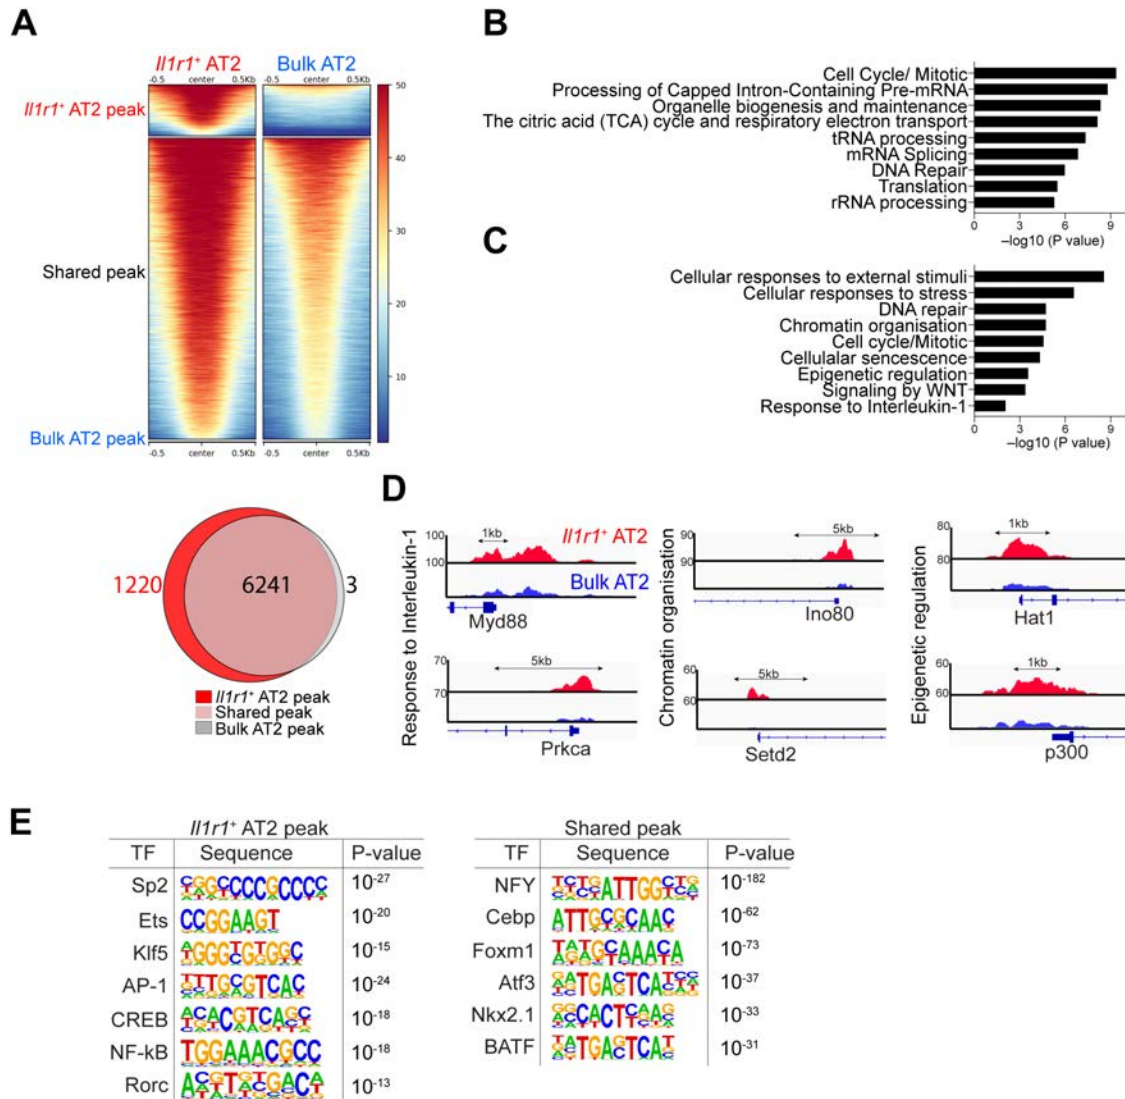

1

2 **Figure 6. *Ill1r1<sup>+</sup>*AT2 cells possess a chromatin architecture that enables a rapid response**  
 3 **to injury.**

4 (A) ATAC-seq heat map (Top) and Venn diagrams (bottom) showing genome-wide regions of  
 5 differential open chromatin peaks in *Ill1r1<sup>+</sup>*AT2 versus bulk AT2 cells in duplicates. The values  
 6 correspond to the peak signal distribution around TSS (Transcription Start Sites). Number of  
 7 nearest neighbour genes covered by peaks are indicated on diagrams.

8 (B) GO enrichment analysis of the nearest neighbour genes in the vicinity of peaks shared  
 9 between *Ill1r1<sup>+</sup>*AT2 and bulk AT2 cells.

10 (C) GO enrichment analysis of the nearest neighbour genes in the vicinity of *Ill1r1<sup>+</sup>*AT2 peaks.

11 (D) Snapshots of genomic loci in which the chromatin-accessible peaks are specifically opened  
 12 in *Ill1r1<sup>+</sup>*AT2 cells identified by GO enrichment analysis shown in (C).



1 **(E)** Transcription factor motif enrichment within *Il1r1*<sup>+</sup>AT2-specific peaks or peaks shared  
2 between *Il1r1*<sup>+</sup>AT2 and bulk AT2 cells. **See also Fig. S10.**

3

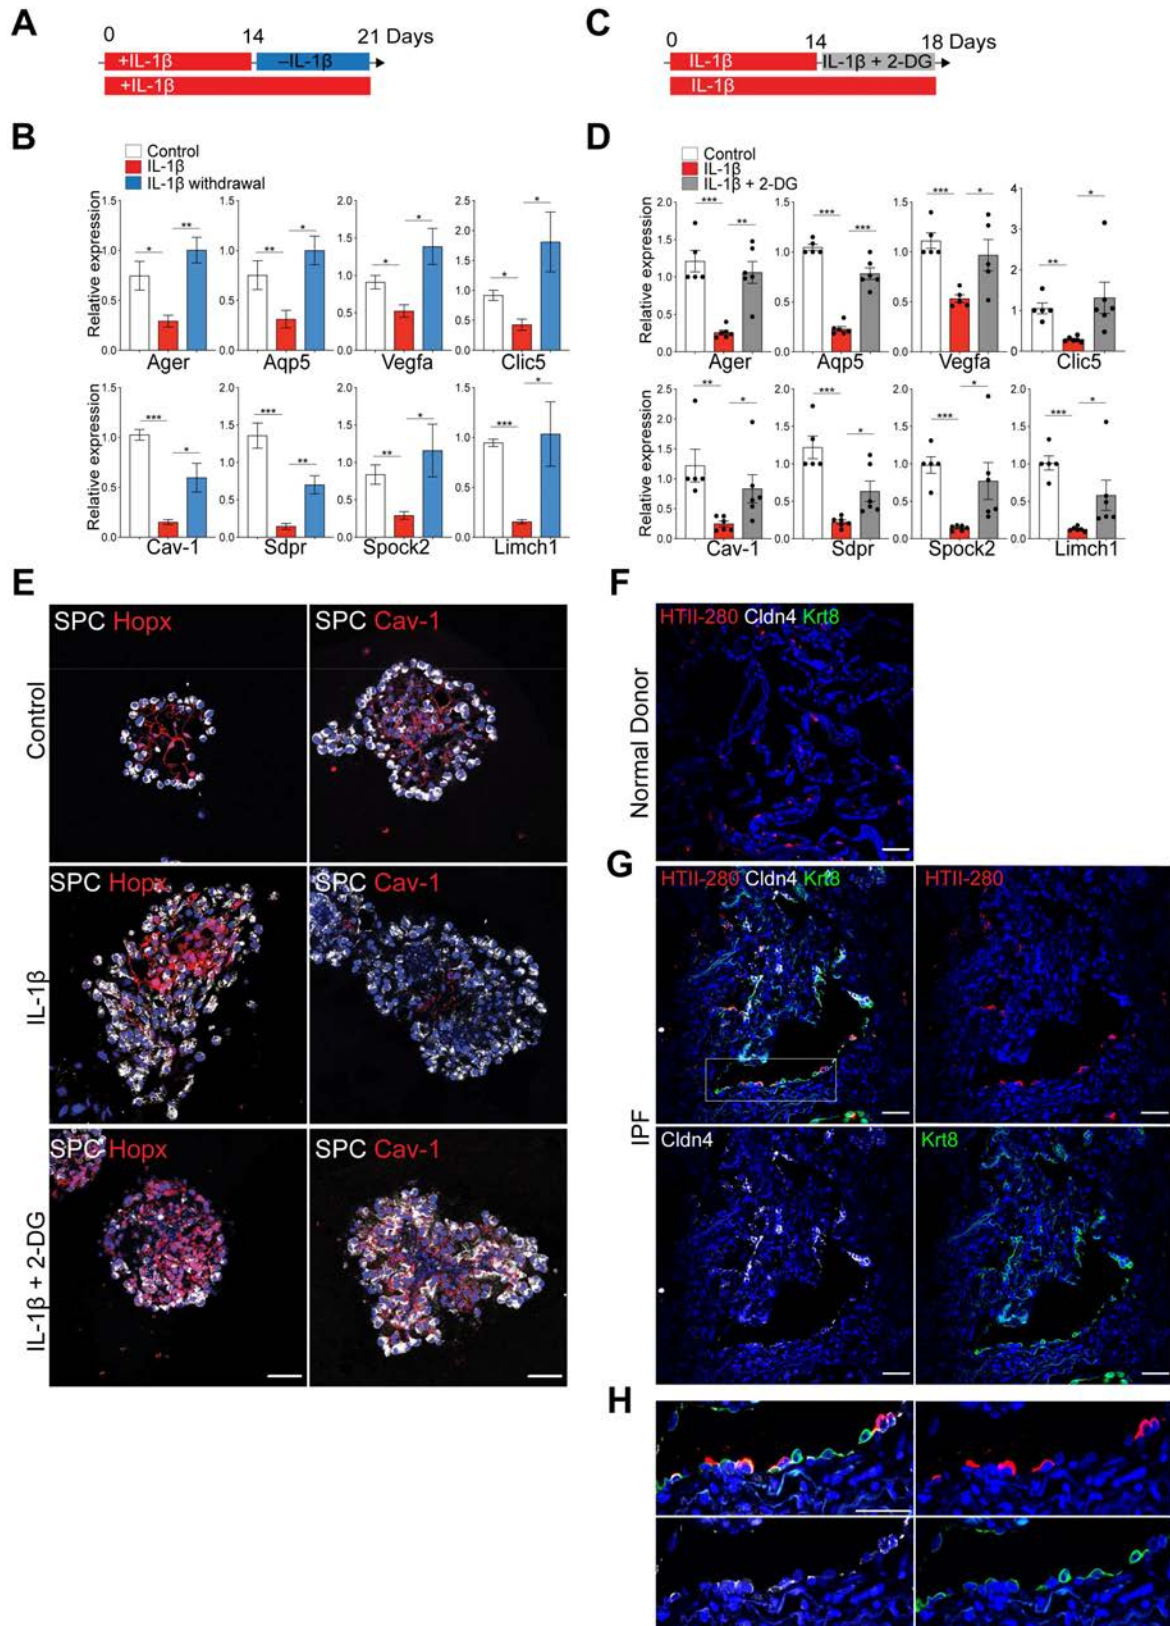

1

2 **Figure 7. Glycolysis pathway driven by IL-1 $\beta$  prevent DATPs from converting into**  
 3 **terminally mature AT1 cells.**

4 **(A)** Schematic of AT2 organoid culture treated with or without IL-1 $\beta$ .

- 1 **(B)** qPCR analysis for mature AT1 markers on isolated epithelial cells from AT2 organoids.  
2 Data are presented as mean  $\pm$  SEM of four biological replicates from two-independent  
3 experiments. \* $p < 0.05$ , \*\* $p < 0.01$ , \*\*\* $p < 0.001$ .
- 4 **(C)** Schematic of AT2 organoid culture treated with or without 2-deoxy glucose (2-DG) in the  
5 presence of IL-1 $\beta$ .
- 6 **(D)** qPCR analysis for mature AT1 markers on isolated epithelial cells from AT2 organoids.  
7 Each individual dot represents one experiment and data are presented as mean  $\pm$  SEM. \* $p < 0.05$ ,  
8 \*\* $p < 0.01$ , \*\*\* $p < 0.001$ .
- 9 **(E)** Representative IF images showing the rescued maturation of AT1 cells in 2-DG treated  
10 organoids in the presence of IL-1 $\beta$ : SPC (white), Hopx (top, red), Cav-1 (bottom, red) and  
11 DAPI (blue). Scale bar, 50  $\mu\text{m}$ . **See also Fig. S11.**
- 12 **(F)** Representative IF images of KRT8<sup>+</sup>CLDN4<sup>+</sup> DATPs-like population in the lung from  
13 normal donors (n=3). HTII-280 (red), CLDN4 (white), KRT8 (green) and DAPI (blue). Scale  
14 bar, 50  $\mu\text{m}$ . **See also Fig. S12.**
- 15 **(G)** Representative IF images of KRT8<sup>+</sup>CLDN4<sup>+</sup> DATPs-like population in the lung from IPF  
16 patients (n=5). HTII-280 (red), CLDN4 (white), KRT8 (green) and DAPI (blue). Scale bar, 50  
17  $\mu\text{m}$ .
- 18 **(H)** High-power view of white boxed insets in Fig. 7G. HTII-280 (red), CLDN4 (white), KRT8  
19 (green) and DAPI (blue). Scale bar, 50  $\mu\text{m}$ .

20

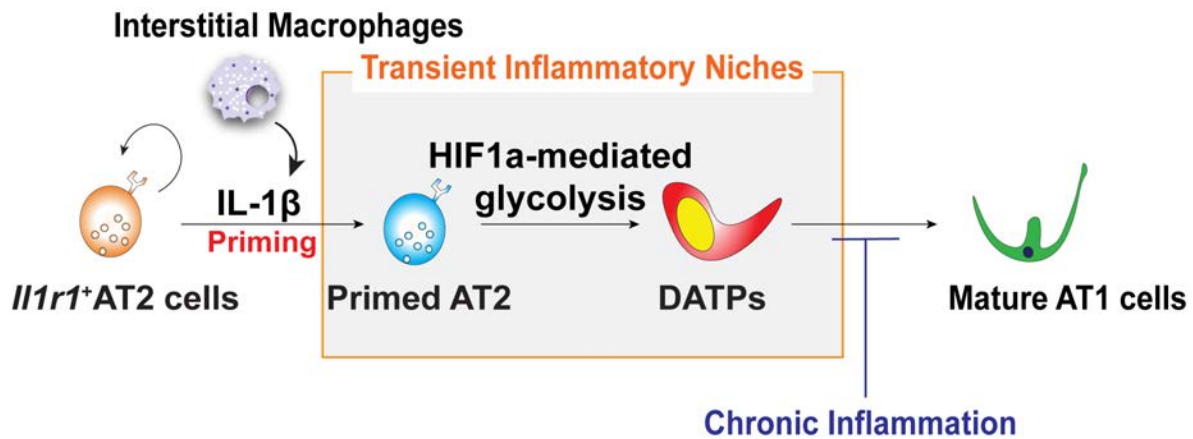

1

2 **Figure 8. Reconstitution of lineage differentiation programs from AT2 to AT1 cells via**  
3 **DATPs is directed by IL-1 $\beta$  signaling during injury repair.**

4 Molecular mechanism governing the AT2 cell reprogramming by IL-1 $\beta$ -driven transient  
5 inflammatory niches during alveolar regeneration. Pro-inflammatory cytokine IL-1 $\beta$  secreted  
6 from interstitial macrophages triggers the reprogramming of *Il1r1*<sup>+</sup>AT2 cells to lose AT2 identity  
7 and enter a primed state during cell cycle transition. In turn, IL-1 $\beta$ -driven HIF1a signaling  
8 promotes the transition into DATPs that are essential mediators for mature AT1 cell  
9 differentiation. Moreover, unresolved inflammation mediated by persistent IL-1 $\beta$  signals  
10 causes the blockade in the transition to terminally differentiated AT1 lineage, which results in  
11 the accumulation of DATPs. This finding highlights the important therapeutic implications of  
12 DATPs and their modulation by IL-1 $\beta$  signalling in the context of chronic inflammation  
13 associated diseases.

14

1 **Supplemental Information**

2

3 **Reconstitution of Alveolar Regeneration via novel DATPs by Inflammatory Niches**

4

5 Jinwook Choi, Jong-Eun Park, Georgia Tsagkogeorga, Motoko Yanagita, Bon-Kyoung Koo,  
6 Namshik Han, and Joo-Hyeon Lee

7

8

9

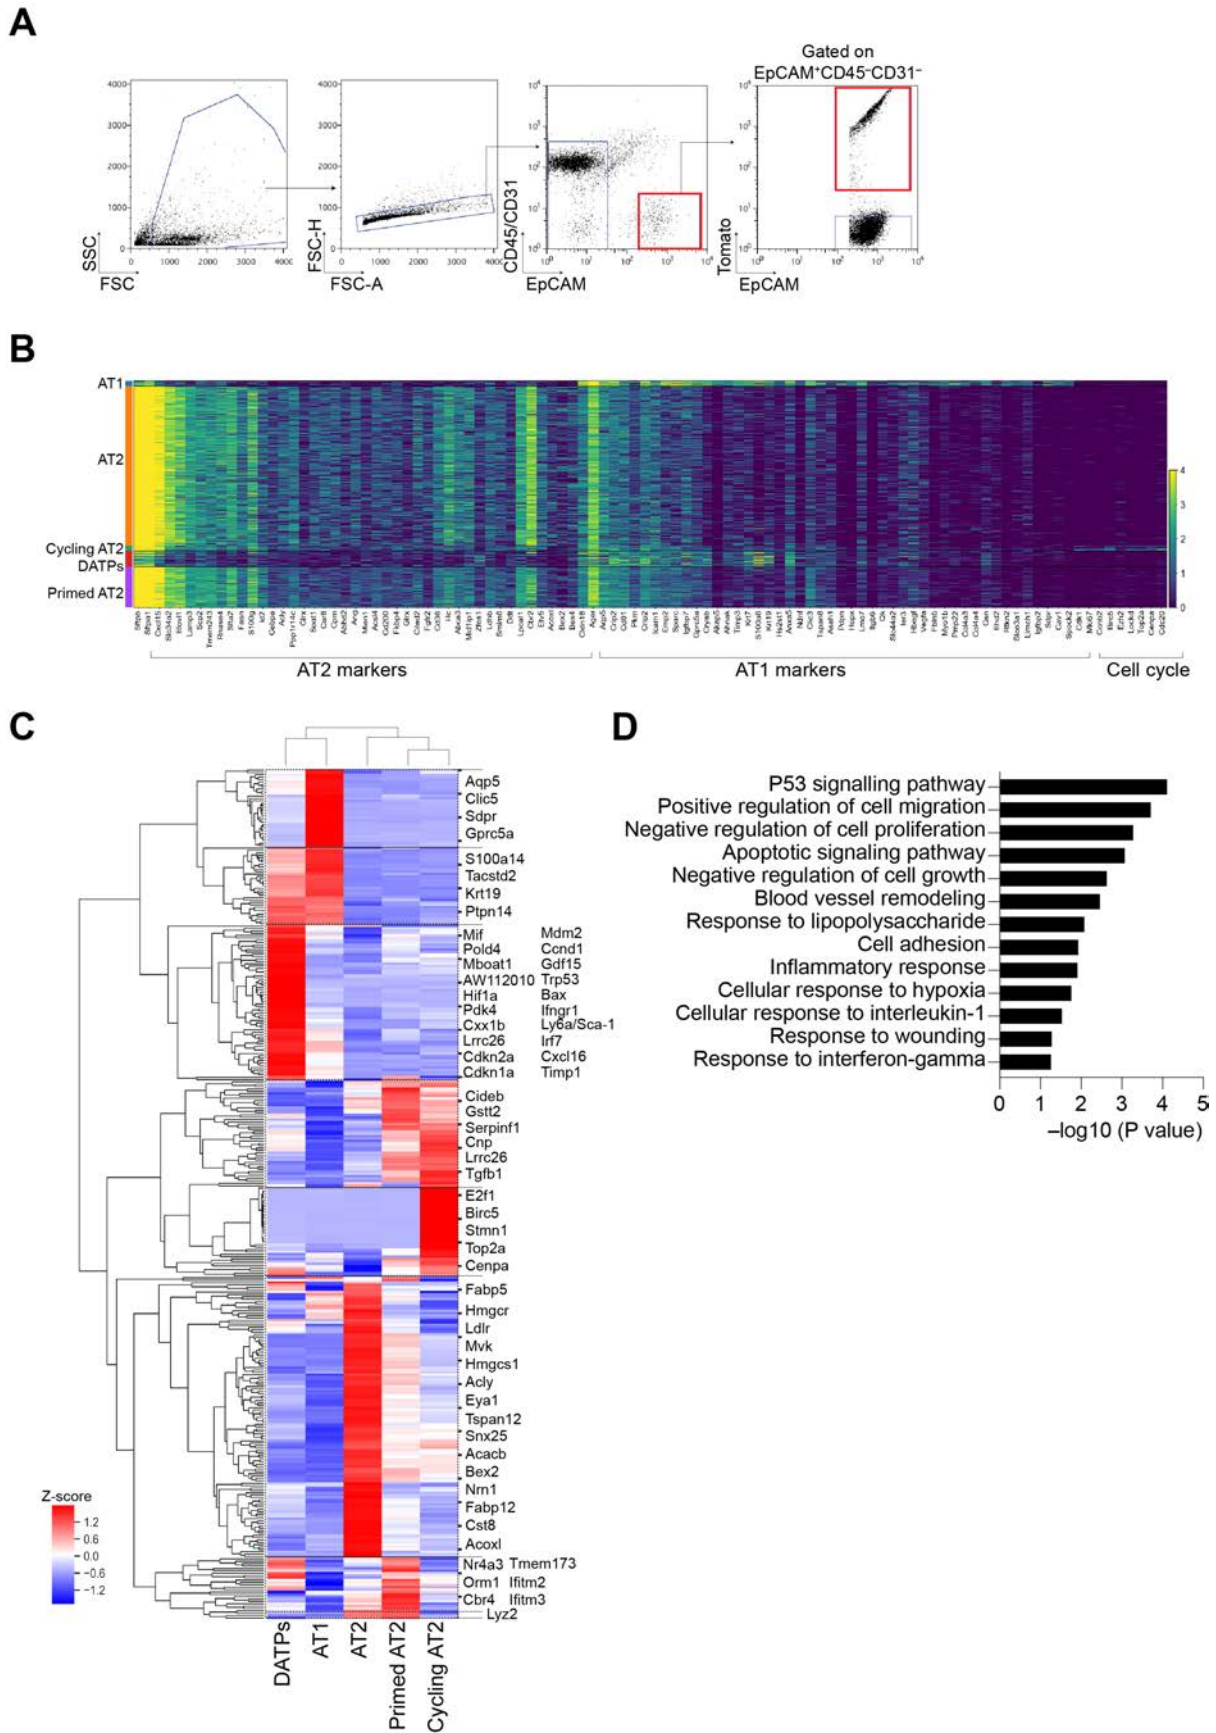

1

2 **Figure S1, related to Fig. 1. Single-cell profiling of SPC lineage-labeled cells during injury**  
 3 **repair.**

- 1 **(A)** Sorting strategy for *SPC* lineage-labeled cells by flow cytometry after bleomycin injury.
- 2 **(B)** Gene expression of AT2 markers, AT1 markers, or cell cycle markers across single cells
- 3 from distinctive subsets revealed by single-cell RNA sequencing (scRNA-seq) analysis during
- 4 injury repair.
- 5 **(C)** Heap map showing relative expression of marker genes in distinctive subsets revealed by
- 6 scRNA-seq analysis.
- 7 **(D)** GO analysis of enriched genes in DATPs.



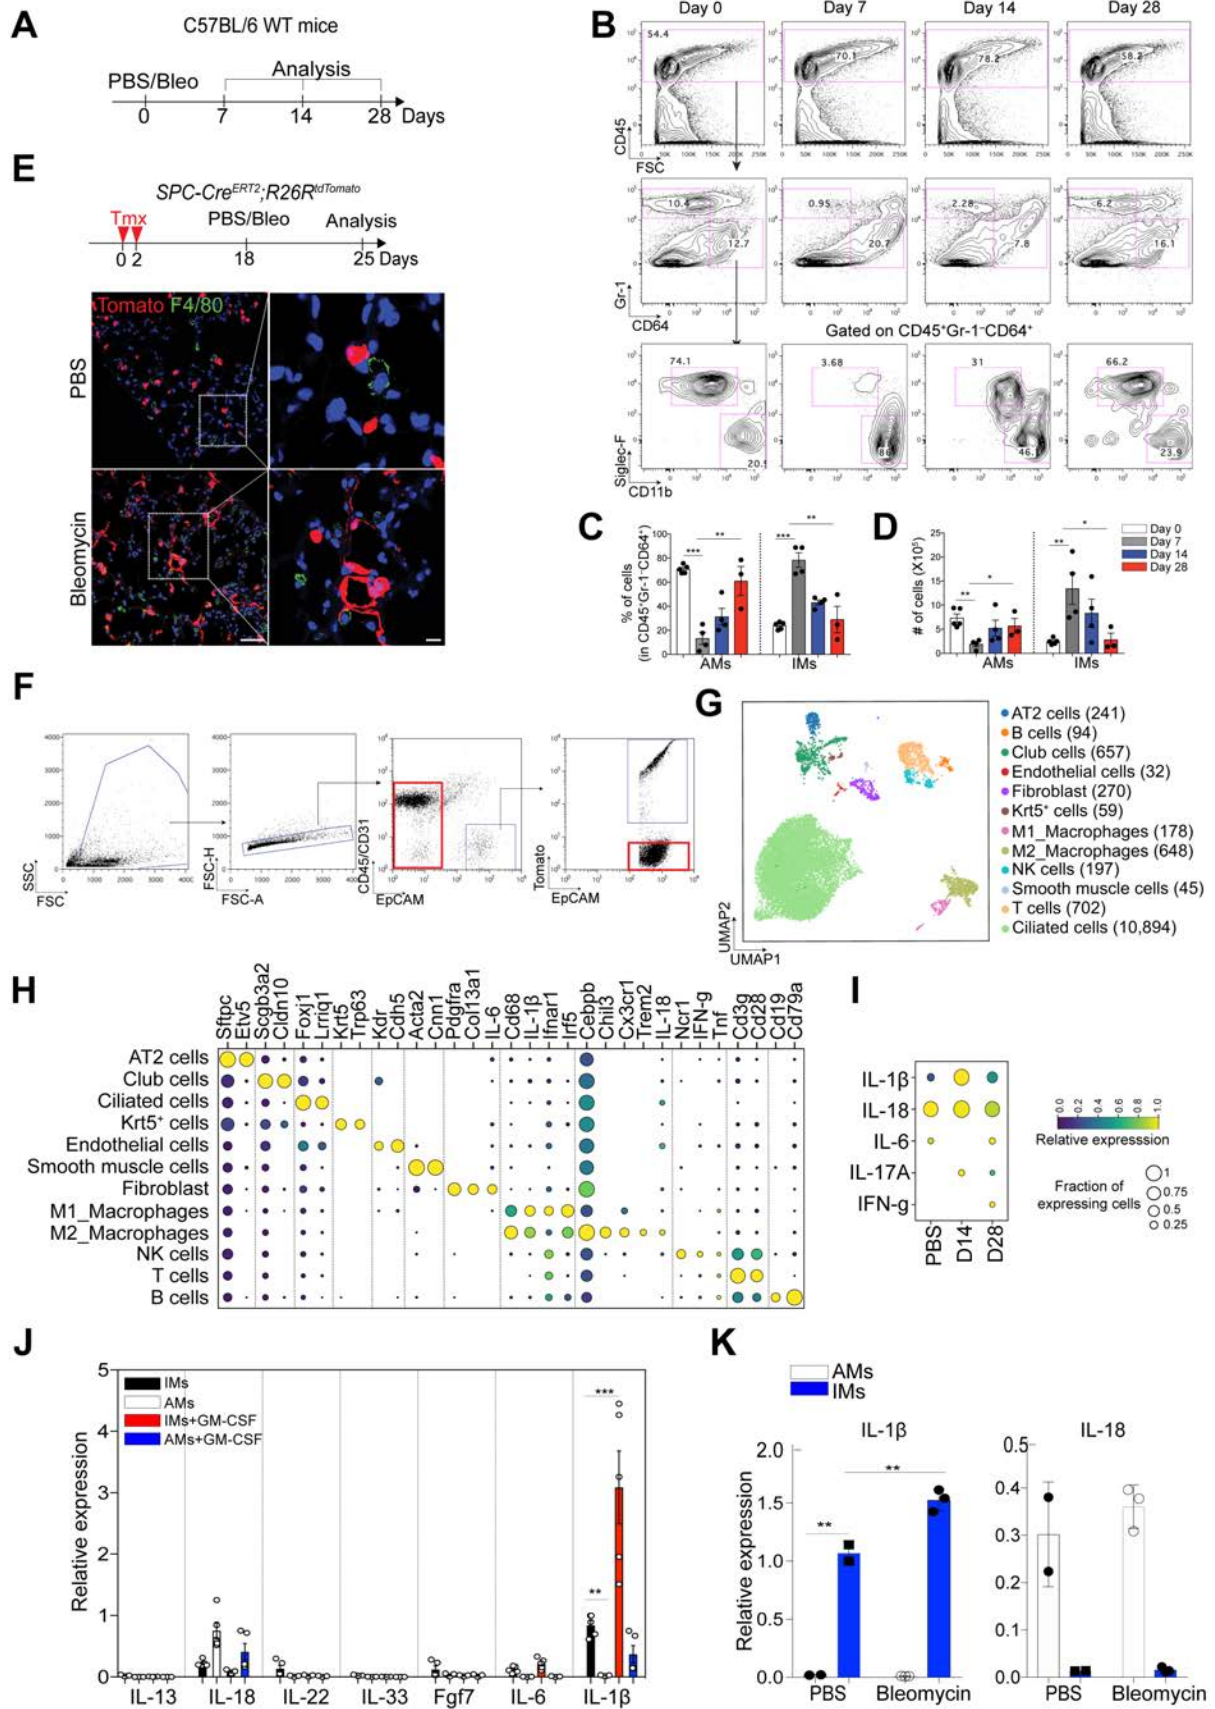

1

2 **Figure S2, related to Fig. 2. Dynamics of macrophages during alveolar regeneration after**

3 **bleomycin injury.**

- 1 **(A)** Schematic of experimental design for analysis of immune cells at indicated time points  
2 after bleomycin injury.
- 3 **(B)** Flow cytometry analysis of alveolar (Siglec-F<sup>+</sup>CD11b<sup>low</sup>) and interstitial (Siglec-F<sup>-</sup>  
4 CD11b<sup>high</sup>) macrophages at indicated time points post injury. Cells gated on CD45<sup>+</sup>CD64<sup>+</sup>Gr-  
5 1<sup>-</sup> were analyzed further for expression of Siglec-F and CD11b. Numbers adjacent to the  
6 outlined area indicate the percentage of populations.
- 7 **(C, D)** Frequencies **(C)** and absolute cell numbers **(D)** of alveolar (AMs) or interstitial (IMs)  
8 macrophages at indicated time points. Each individual dot represents one experiment and date  
9 are presented as mean ± SEM. \*p<0.05, \*\*p<0.01, and \*\*\*p<0.001.
- 10 **(E)** Experimental design (top) of *SPC* lineage-tracing and immunofluorescent (IF, bottom)  
11 images of tissue samples after bleomycin treatment. IF images show the increased numbers of  
12 F4/80<sup>+</sup> macrophages at day 7 post injury. A high magnification images (right) show the  
13 interaction between macrophages and *SPC* lineage-labeled cells. Data are the representative of  
14 two independent experiments. Scale bar, 50 μm (left) and 10 μm (right). Tomato (red), F4/80  
15 (green), and DAPI (blue).
- 16 **(F)** Sorting strategy for *SPC* unlabeled single cells pooling of EpCAM<sup>+</sup>Tomato<sup>-</sup> and EpCAM<sup>-</sup>  
17 population by flow cytometry after bleomycin injury.
- 18 **(G)** Clusters of unlabeled cells (14,017) after bleomycin injury from 10xGenomics 3' scRNA-  
19 seq analysis visualized by UMAP, assigned by specific colors. Number of cells in the  
20 individual cluster is depicted in the figure.
- 21 **(H)** Gene expression of key markers in each distinctive cluster. *IL-1β* is specifically expressed  
22 in macrophages.
- 23 **(I)** Gene expression of *IL-1β*, *IL-18*, *IL-6*, *IL-17A*, and *IFN-g* at indicated time points after  
24 bleomycin injury. Of note, the expression of *IL-1β* is dramatically increased at day 14 post  
25 injury and returns back to the homeostatic level at day 28 post injury.
- 26 **(J)** qPCR analysis of specific cytokine expression in alveolar (AMs) or interstitial (IMs)  
27 macrophages in response to activation by GM-CSF. Isolated subsets of macrophages were  
28 cultured in the presence or absence of GM-CSF for 24hrs *in vitro*. Each individual dot  
29 represents one experiment and date are presented as mean ± SEM.
- 30 **(K)** qPCR analysis for *IL-18* and *IL-1β* in alveolar (AMs, white bar) or interstitial (IMs, blue  
31 bar) macrophages isolated at day 7 after PBS or bleomycin treatment. Each individual dot  
32 represents one experiment from one mouse and date are presented as mean ± SEM. \*\*p<0.01,  
33 \*\*\*p<0.001.

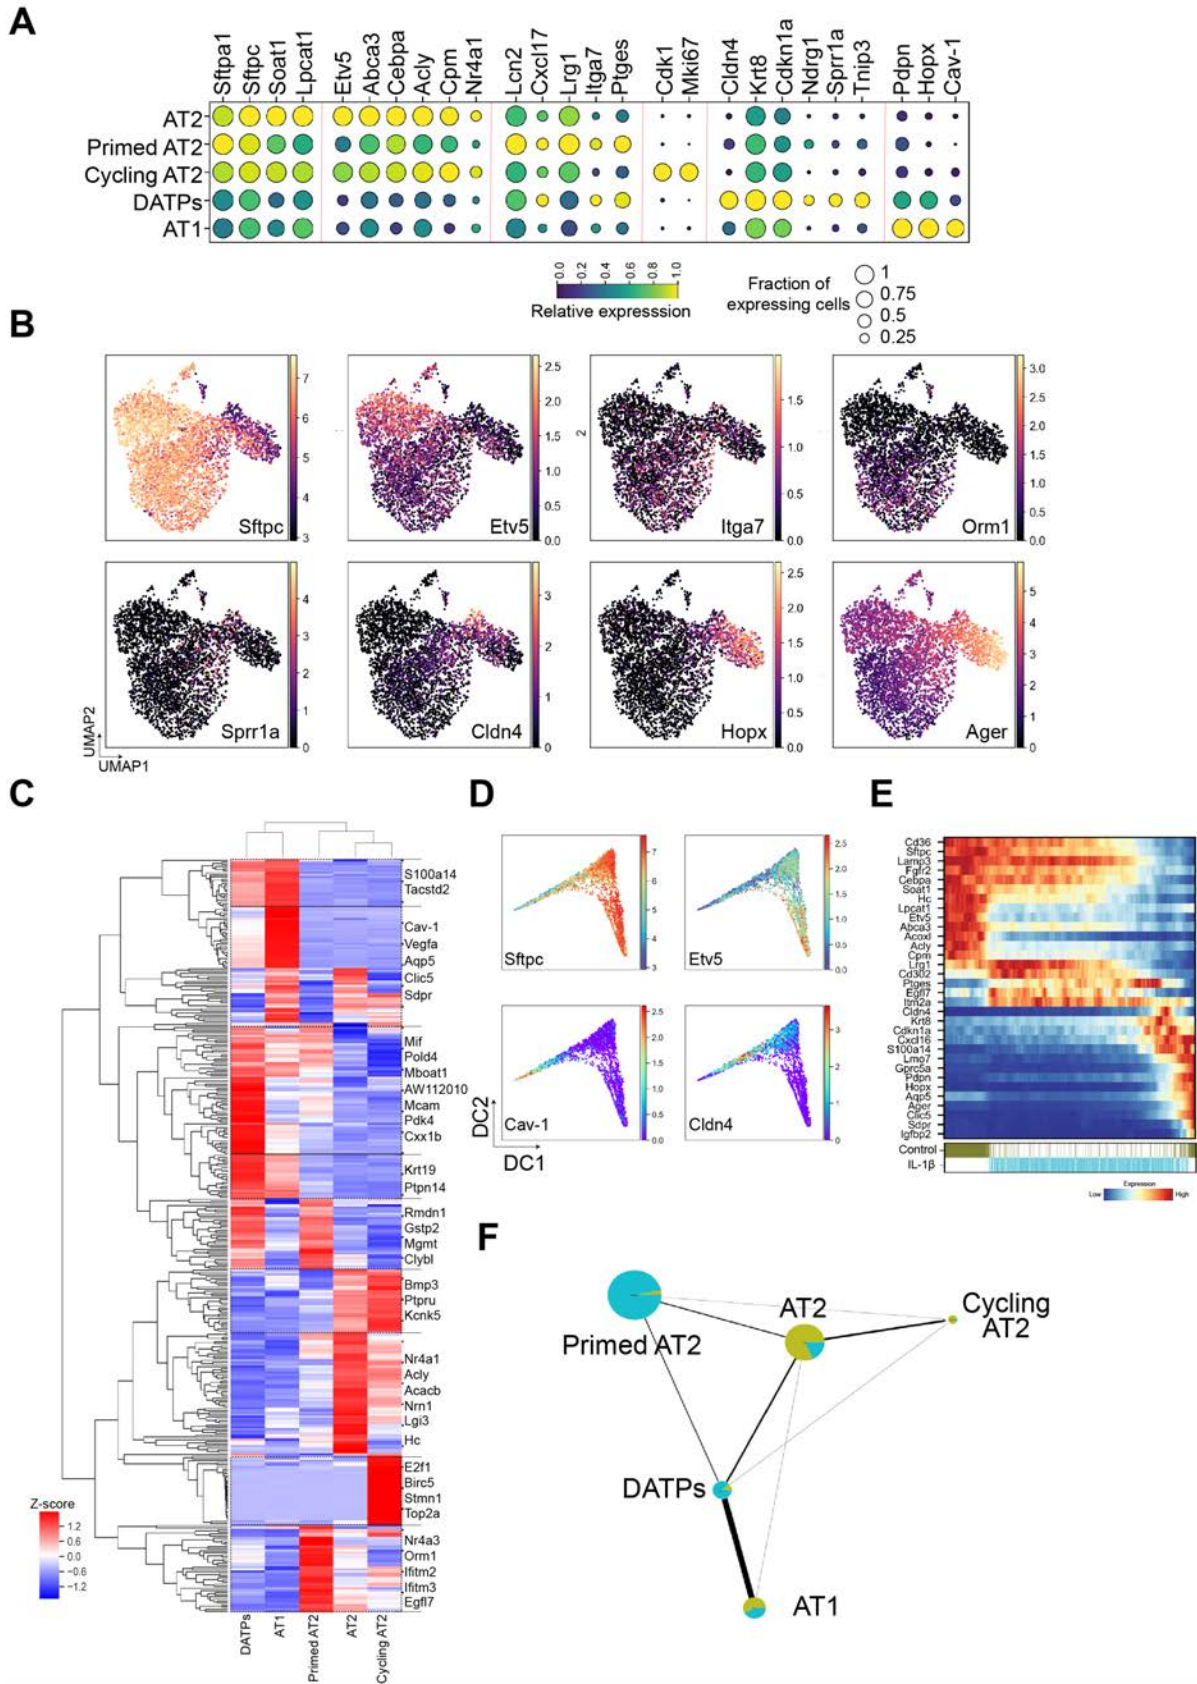

1  
 2 **Figure S3, related to Fig. 2, F-H. Alveolar organoids challenged by IL-1 $\beta$  recapitulate the**  
 3 **behavior of regenerating AT2 cells during injury repair.**  
 4 **(A) Gene expression of key markers in each distinctive cluster.**

- 1 **(B)** UMAP visualization of the log-transformed ( $\log_{10}(\text{TPM}+1)$ ), normalized expression of
- 2 selected marker genes in distinctive clusters.
- 3 **(C)** Heap map showing relative expression of selected genes that are specifically expressed in
- 4 distinctive clusters revealed by scRNA-seq analysis.
- 5 **(D)** Diffusion map according to diffusion pseudotime order colored by expression
- 6 ( $\log_{10}(\text{TPM}+1)$ ) of specific genes.
- 7 **(E)** Gene expression profiles of control and IL-1 $\beta$ -treated organoids ordered according to
- 8 pseudotime trajectory. Lower color bars indicate annotation by samples.
- 9 **(F)** Network topology among clusters from single cell data revealed by Partition-based graph
- 10 abstraction (PAGA). Colors indicate the proportion of each cluster by time point. Each node in
- 11 the PAGA graph represents a cluster and the weight of the lines represents the statistical
- 12 measure of connectivity between clusters.



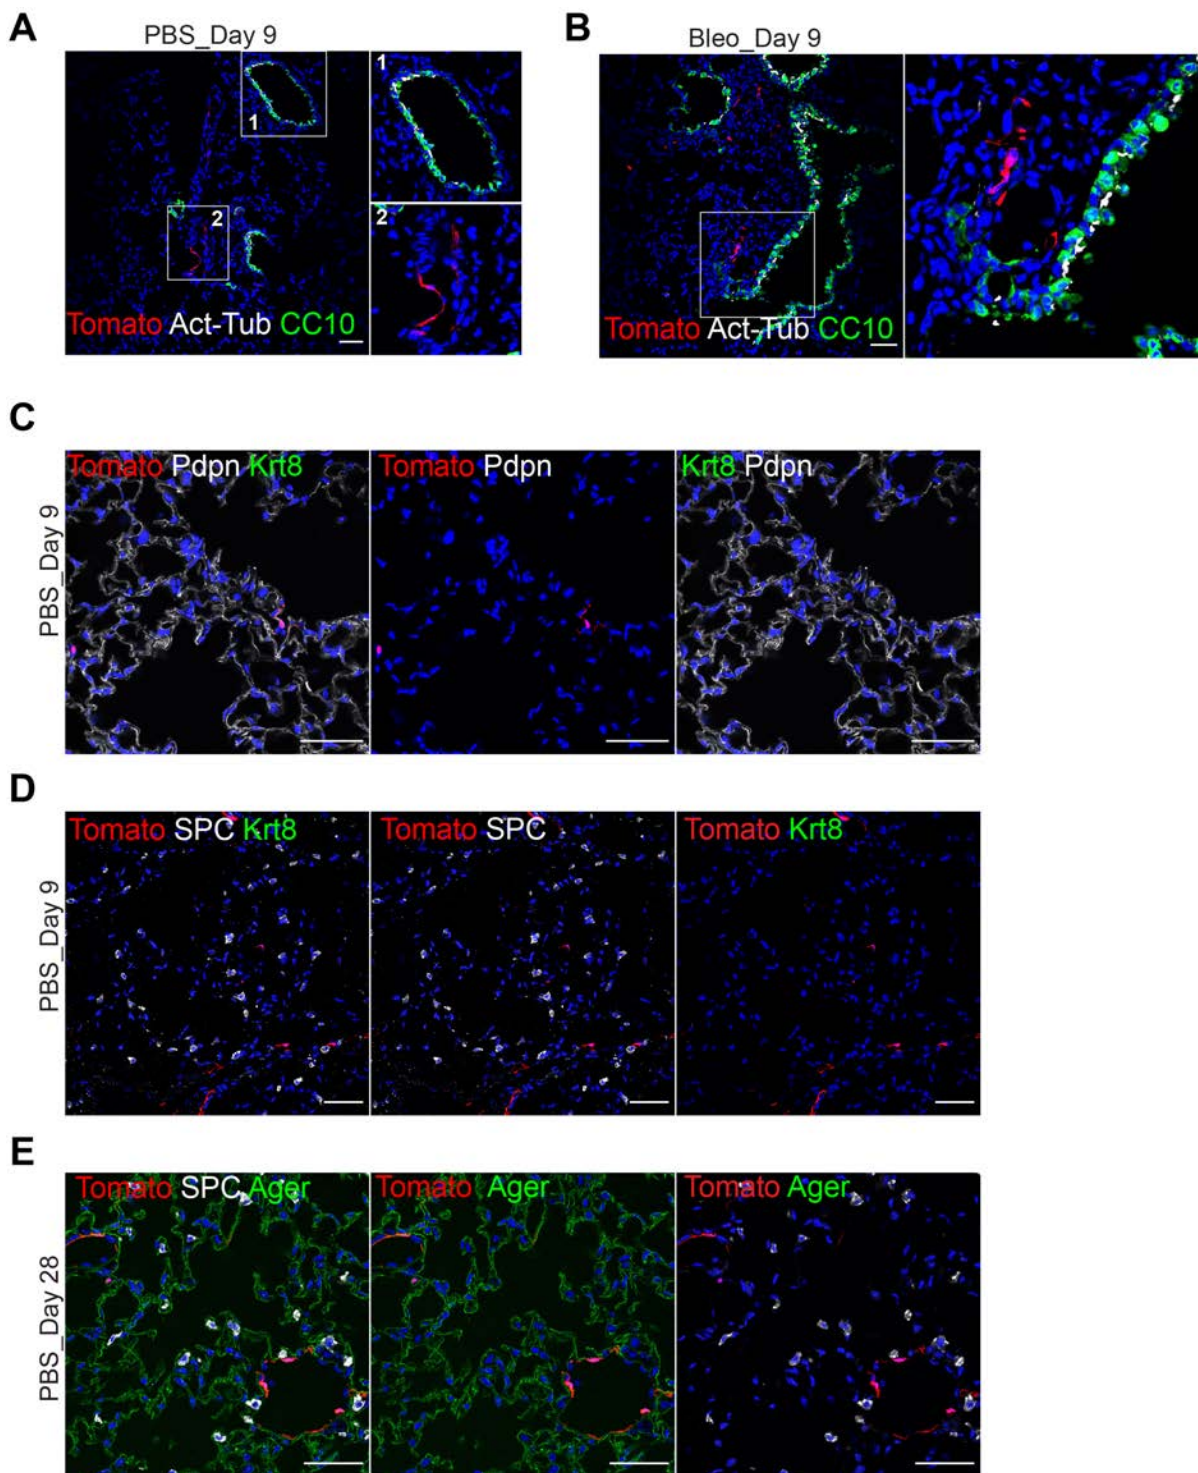

1  
2 **Figure S4, related to Fig. 3. *NdrG1* does not mark epithelial cells in steady-state lungs.**  
3 (A) Representative IF images show that airway cells are not marked by *NdrG1* expression at  
4 day 9 post PBS treatment: Tomato (for *NdrG1* lineage, red), CC10 (green, club cells), Acetyl-  
5 Tub (white, ciliated cells), and DAPI (blue). Insets (left) show high-power view (right).  
6 (B) Representative IF images show that airway cells are not marked by *NdrG1* expression at  
7 day 9 post bleomycin injury: Tomato (for *NdrG1* lineage, red), CC10 (green, club cells), Acetyl-  
8 Tub (white, ciliated cells), and DAPI (blue). Insets (left) show high-power view (right).

1 (C) Representative IF images show that lineage-labeled DATPs are barely observed at day 9  
2 post PBS treatment: Tomato (for *NdrG1* lineage, red), Pdpn (white) and Krt8 (green). Scale bar,  
3 50  $\mu$ m.

4 (D) Representative IF images show that SPC<sup>+</sup> AT2 cells are not labeled by *NdrG1* expression  
5 at day 9 post PBS treatment: Tomato (for *NdrG1* lineage, red), SPC (white) and Krt8 (green).  
6 Scale bar, 50  $\mu$ m.

7 (E) Representative IF images show that neither AT2 and AT1 cells are labeled by *NdrG1*  
8 expression at day 28 post PBS treatment: Tomato (for *NdrG1* lineage, red), SPC (white) and  
9 Ager (green). Scale bar, 50  $\mu$ m.

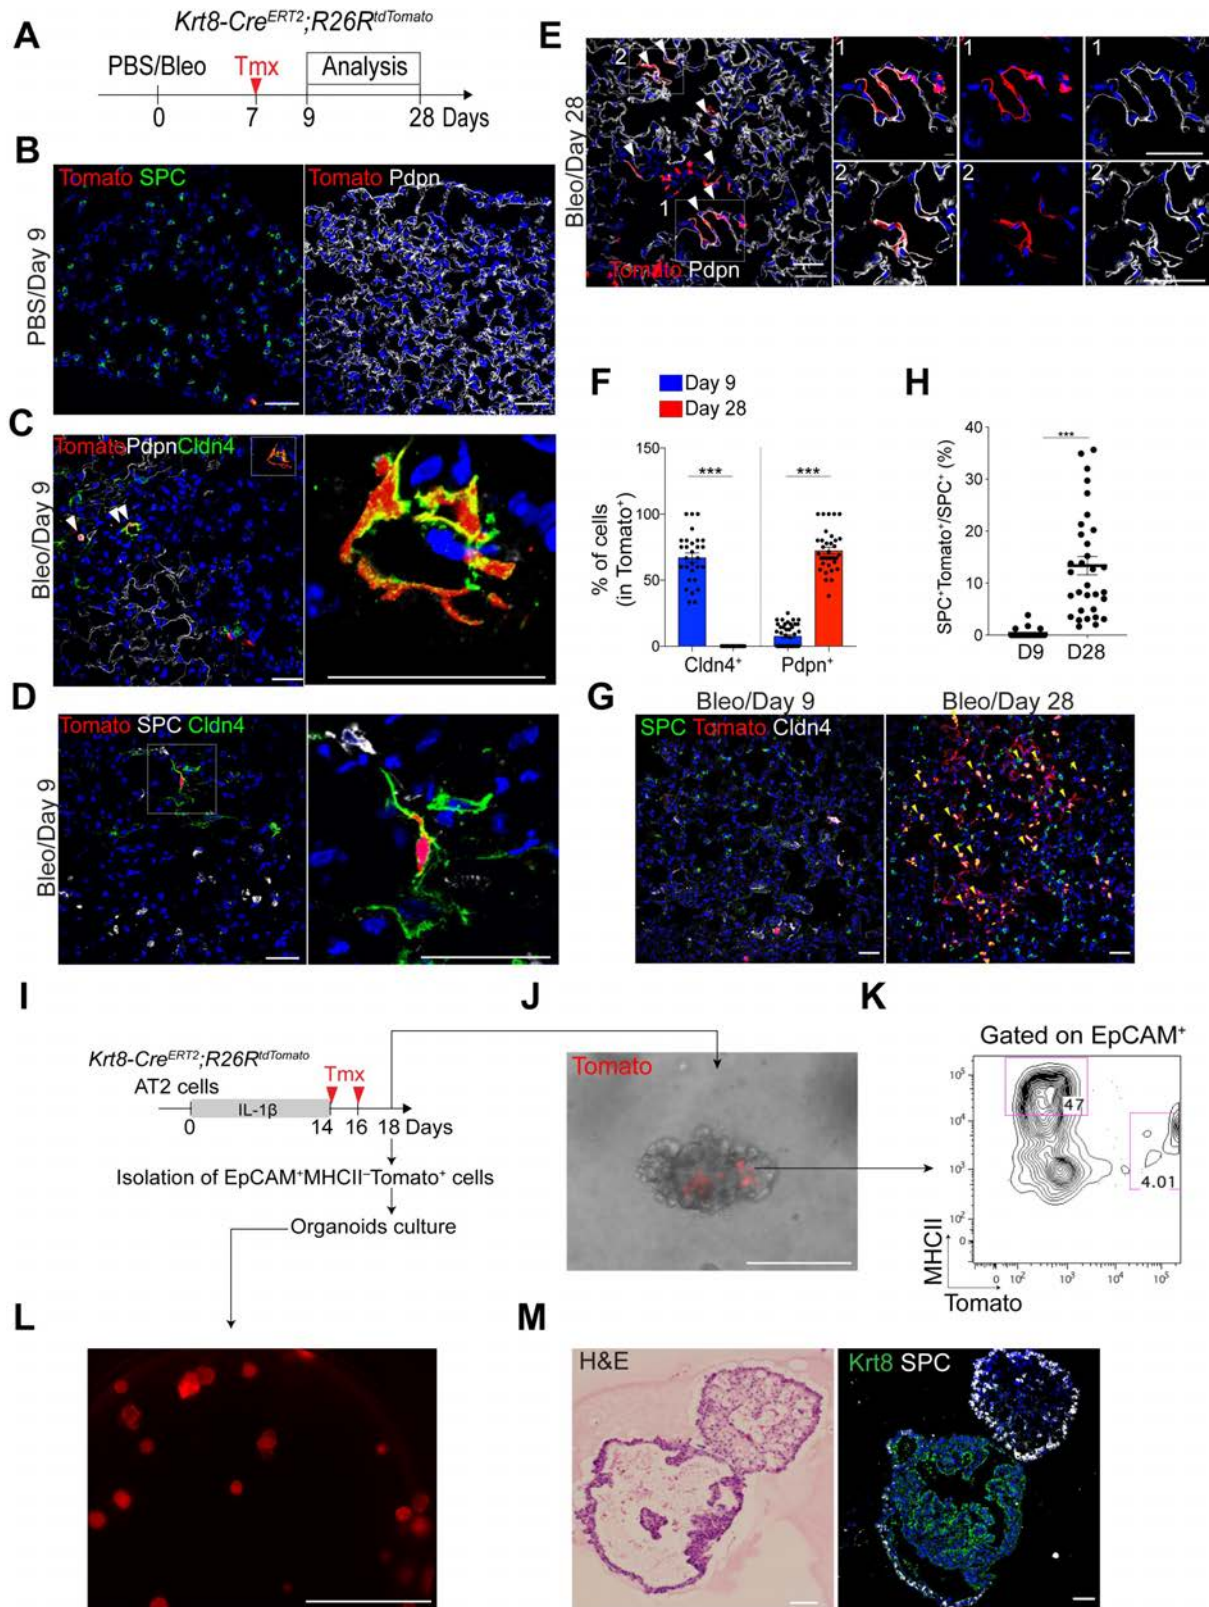

1  
 2 **Figure S5, related to Fig. 3. Lineage tracing analysis of *Krt8*<sup>+</sup> cells reveals that DATPs**  
 3 **are capable of producing AT1 cells and reverting to AT2 cells during alveolar**  
 4 **regeneration.**



- 1 **(A)** Experimental design for *Krt8* lineage-tracing analysis using *Krt8-Cre<sup>ERT2</sup>;R26R<sup>tdTomato</sup>*  
2 reporter mice after bleomycin injury. Specific time points for tamoxifen injection and analysis  
3 are indicated.
- 4 **(B)** Representative IF images show that none of AT2 (left) and AT1 (right) cells are lineage-  
5 labeled by *Krt8* expression in uninjured lung (PBS control): Tomato (red), SPC (green, left),  
6 Pdpn (white, right), and DAPI (blue). Scale bar, 50  $\mu$ m.
- 7 **(C, D)** Representative IF images show that *Krt8* lineage-labeled cells express Cldn4 at day 9  
8 post injury. None of AT1 (C) and AT2 (D) cells are lineage-labeled by *Krt8* expression at this  
9 time point: Tomato (red), Pdpn (white), Cldn4 (green), and DAPI (blue). Arrowhead points to  
10 *Krt8* lineage-labeled DATPs. White boxed insets are shown on the right. Scale bar, 50  $\mu$ m.
- 11 **(E)** Representative IF images show that *Krt8* lineage-labeled cells generate new AT1 cells at  
12 day 28 after injury: Tomato (red), Pdpn (white), and DAPI (blue). Arrowhead points to lineage-  
13 labeled Pdpn<sup>+</sup> cells. Insets (left) show high-power view (1, right top; 2, right bottom). Scale  
14 bar, 50  $\mu$ m.
- 15 **(F)** Statistical quantification of Cldn4<sup>+</sup>Tomato<sup>+</sup> or Pdpn<sup>+</sup>Tomato<sup>+</sup> cells at indicated time points  
16 after injury. Each individual dot represents one section and data are presented as mean  $\pm$  SEM  
17 with two independent experiments (n=5). \*\*\*p<0.001.
- 18 **(G)** Representative IF images show that *Krt8* lineage-labeled cells generate AT2 cells at day  
19 28 post injury. Notably, there are few AT2 cells that are marked by *Krt8* expression at day 9  
20 post injury: Tomato (for *Krt8* lineage, red), SPC (green), Cldn4 (white), and DAPI (blue).  
21 Arrowhead points to lineage-labeled AT2 cells. Scale bars, 50  $\mu$ m.
- 22 **(H)** Quantification of *Krt8* lineage-labeled SPC<sup>+</sup> AT2 cells. Each individual dot represents one  
23 section and data are presented as mean  $\pm$  SEM with three independent experiments (n=4).  
24 \*\*\*p<0.001.
- 25 **(I)** Scheme of experimental design for organoid culture assays. AT2 cells were isolated by  
26 surface markers CD31<sup>-</sup>CD45<sup>-</sup>EpCAM<sup>+</sup>MHCII<sup>+</sup> from *Krt8-Cre<sup>ERT2</sup>;R26R<sup>tdTomato</sup>* mice and  
27 cultured as organoids with IL-1 $\beta$  for 14 days. 4-OH tamoxifen was added at day14 and day16  
28 in culture to label *Krt8*-expressing cells. At day 18, organoids were further analyzed for a  
29 microscopy (I), flow cytometry (J), and organoid formation (K and L).
- 30 **(J)** Representative merged fluorescent and brightfield image of organoids in (H). Treatment of  
31 4-OH tamoxifen allows to mark *Krt8*<sup>+</sup> (Tomato<sup>+</sup>) cells. Scale bar, 200  $\mu$ m. Notably, Tomato  
32 signals were detected only in inner parts of organoids.

1 **(K)** Flow cytometry analysis of AT2 (EpCAM<sup>+</sup>MHCII<sup>+</sup>Tomato<sup>-</sup>) and DATPs  
2 (EpCAM<sup>+</sup>MHCII<sup>-</sup>Tomato<sup>+</sup>) from dissociated organoids in (I). Numbers adjacent to the  
3 outlined area indicate the percentage of populations. Of note, Tomato<sup>+</sup> cells are not AT2 cells.  
4 **(L, M)** Representative fluorescent image **(K)**, and H&E staining **(L, left)** and IF image **(L,**  
5 **right)** of organoids derived from dissociated *Krt8*<sup>+</sup>Tomato<sup>+</sup> cells in (I and J). Scale bar, 1,000  
6 μm **(K)** and 50 μm **(L)**.

7

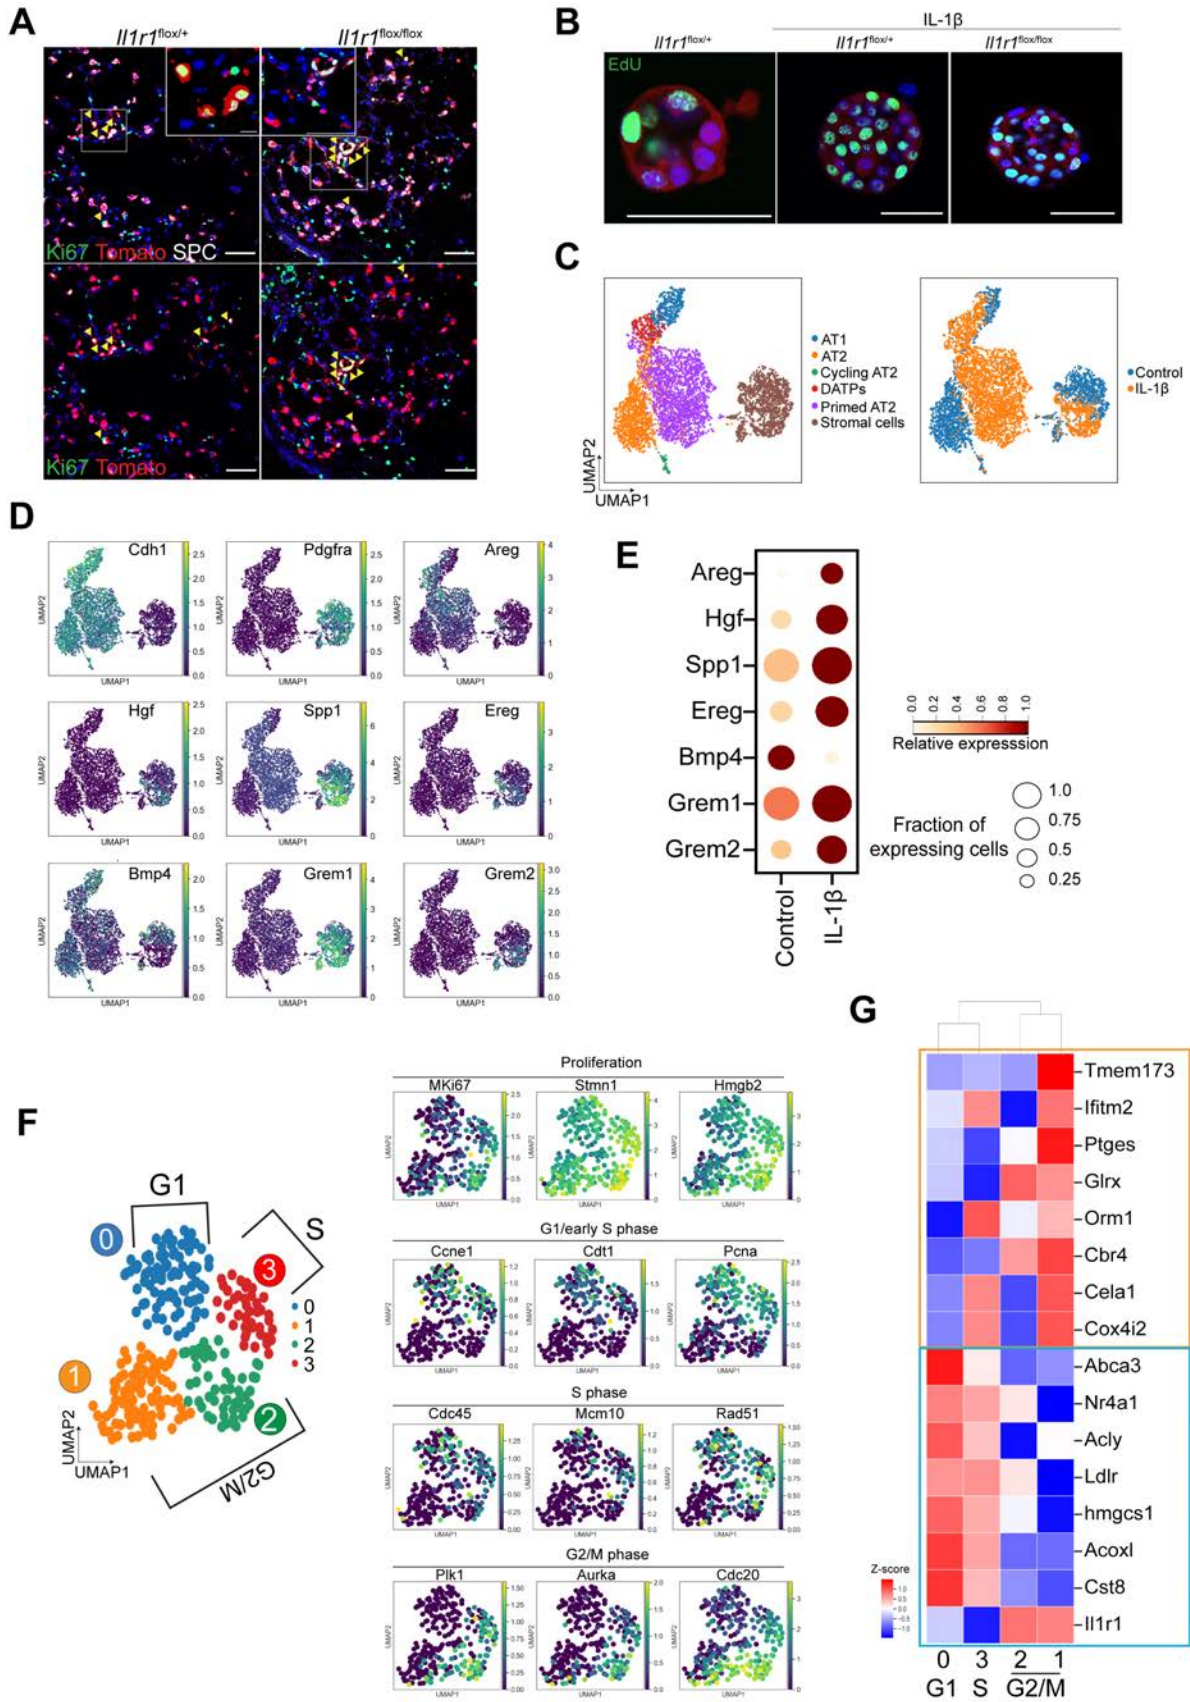

1

2 **Figure S6, related to Fig. 4, B-E. IL-1 $\beta$  signaling primes AT2 cells during cell cycle**

3 **transition.**

1 **(A)** Representative IF images showing Ki67<sup>+</sup> lineage-labeled AT2 cells in the lung of mice  
2 treated with PBS or bleomycin at day 7 post injury: Tomato (for *SPC* lineage, red), Ki67  
3 (green), SPC (white), and DAPI (blue). Arrowheads, Ki67<sup>+</sup> AT2 cells. Insets show high-power  
4 view. Scale bars, 50  $\mu$ m. No discernible differences in number of Ki67<sup>+</sup> AT2 cells were  
5 observed in the lung of indicated genotyped mice.

6 **(B)** Representative IF images showing proliferating cells in AT2 organoids derived from the  
7 lungs of indicated genotyped mice. Organoids were pulsed with BrdU for 4hrs at day 4 in  
8 cultures. Notably, IL-1 $\beta$  treatment enhances proliferation in organoids regardless of *Il1r1*  
9 expression in AT2 cells.

10 **(C)** UMAP visualization of cell clusters from scRNA-seq analysis of epithelial cells and  
11 stromal cells from control or IL-1 $\beta$ -treated organoids. Cells were isolated at day 21 in organoid  
12 culture. Colors indicate distinct cell types (left) and samples (right).

13 **(D)** UMAP visualization of the log-transformed ( $\log_{10}(\text{TPM}+1)$ ), normalized expression of cell  
14 type marker genes (e.g. *Cdh1* for epithelial cells and *Pdgfra* for stromal cells/fibroblast) and  
15 growth factors in each distinctive cluster.

16 **(E)** Gene expression of growth factors that may enhance proliferation of AT2 cells in control  
17 or IL-1 $\beta$ -treated stromal cells.

18 **(F)** Clusters of Cycling AT2 population (cAT2) shown in Fig. 1B visualized by UMAP,  
19 assigned by specific colors. Based on the expression of cell cycle genes, four clusters were  
20 classified into two cell cycle phases; G1 (cluster 0), S phase (cluster 3) and G2/M phase (cluster  
21 2 and 1). UMAP visualization of the log-transformed ( $\log_{10}(\text{TPM}+1)$ ), normalized expression  
22 of marker genes for cell proliferation and cell cycle (G1/early S phase; S phase; G2/M phase).

23 **(G)** Heap map showing the *Il1r1* expression and acquisition of Primed AT2 cell (pAT2)  
24 signatures during cell cycle transition. Acquisition of transcriptional signatures of pAT2 cells  
25 by downregulating of naïve AT2 cell markers including *Abca3* (blue box) and inducing  
26 expression of genes related with inflammatory response including *Ptges* (orange box) during  
27 cell cycle transition from S to G2/M phase.

28

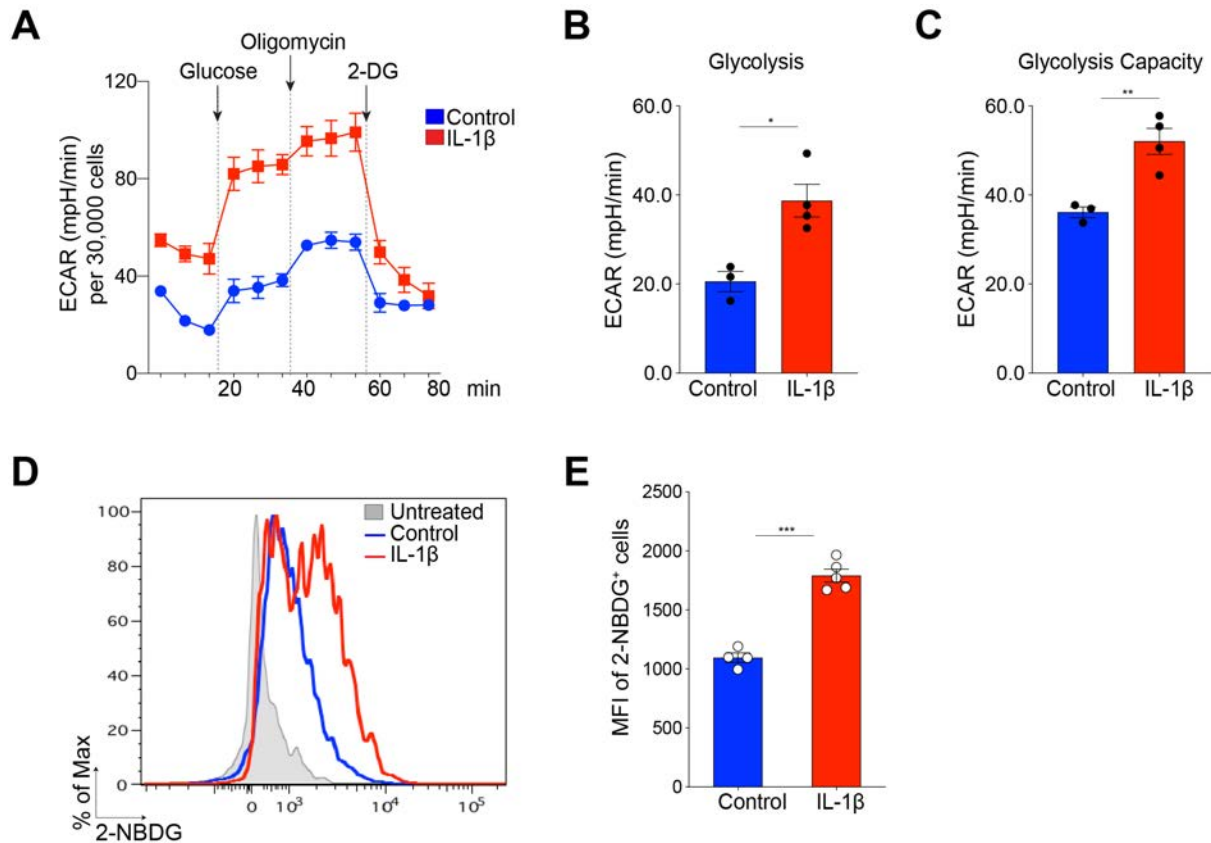

1

2 **Figure S7, related to Fig. 4F. IL-1β enhances the glycolysis metabolism.**

3 (A) Real-time ECAR (Extracellular Acidification Rate) of organoids treated with PBS (control)  
4 and IL-1β was measured by XF-96 analyzer. Vertical lines with arrow indicate addition of  
5 glucose (glycolysis substrate, 10mM), oligomycin (ATP synthase inhibitor, 1uM), and 2-  
6 Deoxy Glucose (2-DG, glycolysis inhibitor, 50mM). X axis indicates measurement times.  
7 ECAR was normalized to 30,000 cells. data are presented as mean ± SE (n=3 for control; n=4  
8 for IL-1β).

9 (B, C) Representative graphs output from XF96 analyzer showing the glycolysis (B) and  
10 glycolytic capacity (C). \*p<0.05, and \*\*p<0.01.

11 (D) Effects of IL-1β on glucose uptake. 2-NBDG incorporation from organoids treated with  
12 PBS control (blue line) or IL-1β (red line) was determined by flow cytometry. Non-treated  
13 cells were used as a negative control for 2-NBDG treatment (grey-filled peak).

14 (E) Representative histograms showing MFI (mean fluorescence of intensity) of 2-NBDG.  
15 Each individual dot represents one individual experiment and data are presented as mean ±  
16 SEM (n=4 for control; n=5 for IL-1β). \*\*\*p<0.001.



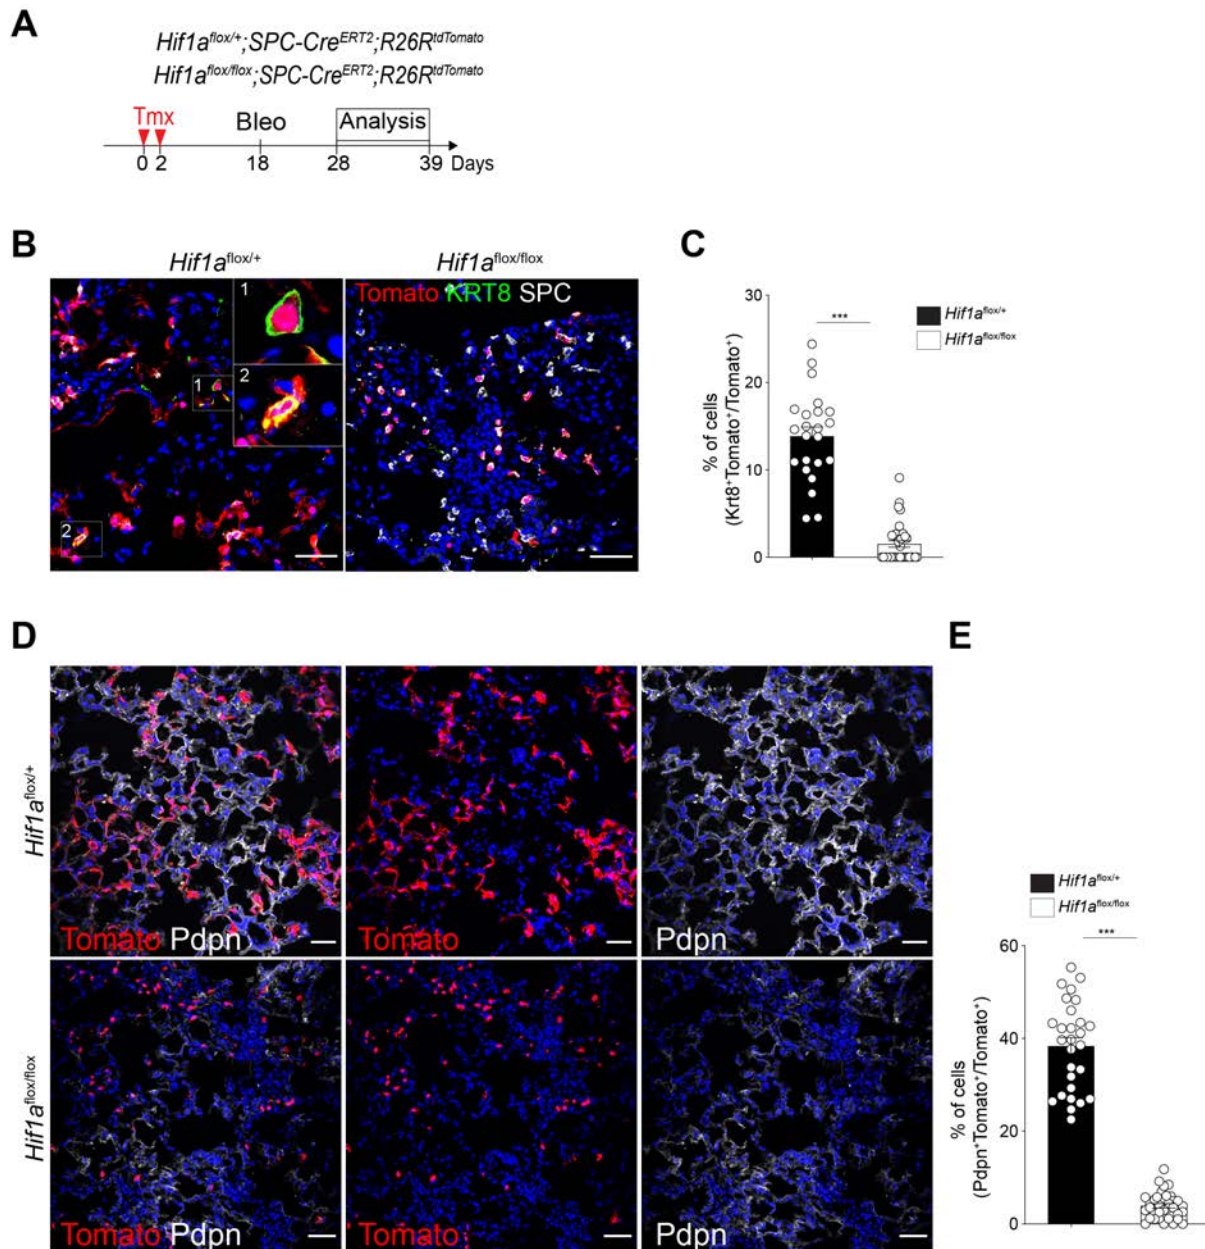

**Figure S8, related to Fig. 4H. Deletion of *Hif1a* on AT2 cells impairs DATPs generation and AT1 cell regeneration.**

(A) Experimental design for lineage tracing. Date for analysis is as indicated.

(B) Representative IF images showing *SPC* lineage-labeled DATPs at day 14 post injury in the lung of indicated genotyped mice: Tomato (for *SPC* lineage, red), Krt8 (green), SPC (white), and DAPI (blue). Insets (left) show high-power view (right top). Scale bars, 50 $\mu$ m.

(C) Quantification of *SPC* lineage-labeled DATPs in (B). Each individual dot represents one section and data are presented as mean  $\pm$  SEM with three independent experiments. Notably, there is a significant decrease in number of lineage-labeled DATPs in the absence of *Hif1a* in AT2 cells.



- 1 **(D)** Representative IF images showing AT1 cell differentiation from *SPC* lineage-labeled cells
- 2 at day 28 post injury in the lung of indicated genotyped mice: Tomato (for *SPC* lineage, red),
- 3 Pdpn (white), and DAPI (blue). Scale bars, 50  $\mu$ m.
- 4 **(E)** Quantification of lineage-labeled Pdpn<sup>+</sup> AT1 cells in **(D)**. Each individual dot represents
- 5 one section and data are presented as mean  $\pm$  SEM (n=3 for *Hif1a*<sup>flox/+</sup>; n=4 for *Hif1a*<sup>flox/flox</sup>).
- 6 Notably, there is a significant decrease in the number of lineage-labeled AT1 cells in the
- 7 absence of *Hif1a* in AT2 cells.

**A**

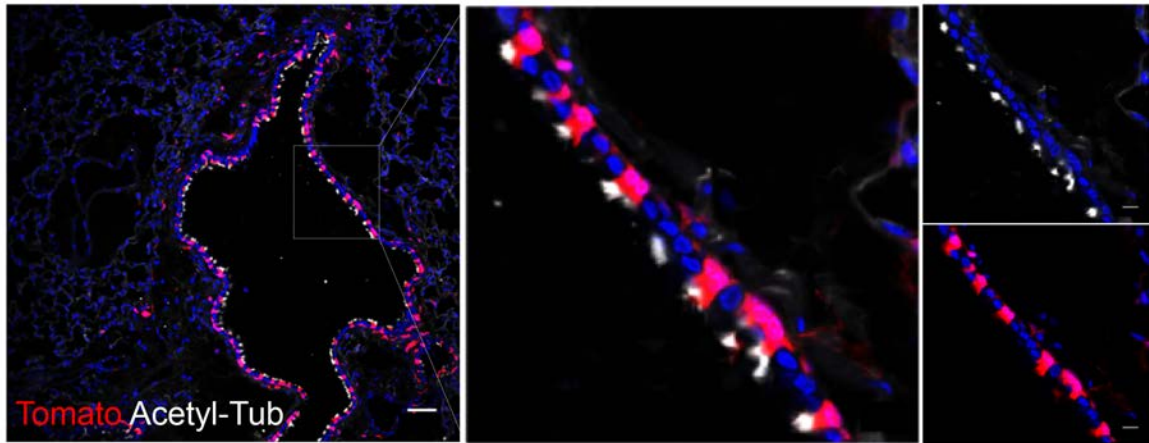

**B**

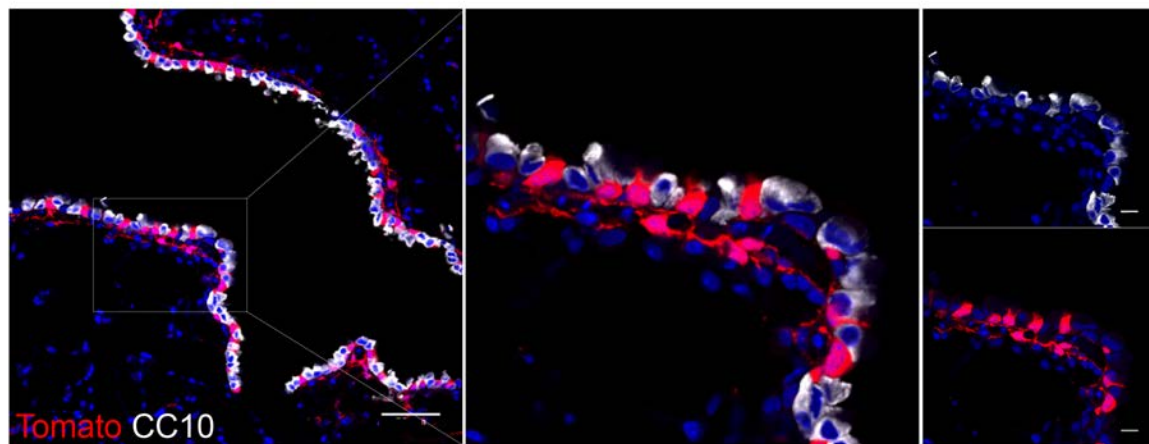

1

2 **Figure S9, related to Fig. 5. *Il1r1* lineage-labeled cells are found in airway ciliated cells in**  
3 **uninjured lungs.**

4 **(A, B)** Representative IF images showing *Il1r1* lineage-labeled cells only in ciliated cells (A)  
5 not in club cells (B) in uninjured lungs at day 14 post two doses of tamoxifen injection: Tomato  
6 (for *Il1r1* lineage, red), Acetyl-Tub (white), CC10 (white), and DAPI (blue). Scale bars: 50  $\mu$ m.

7

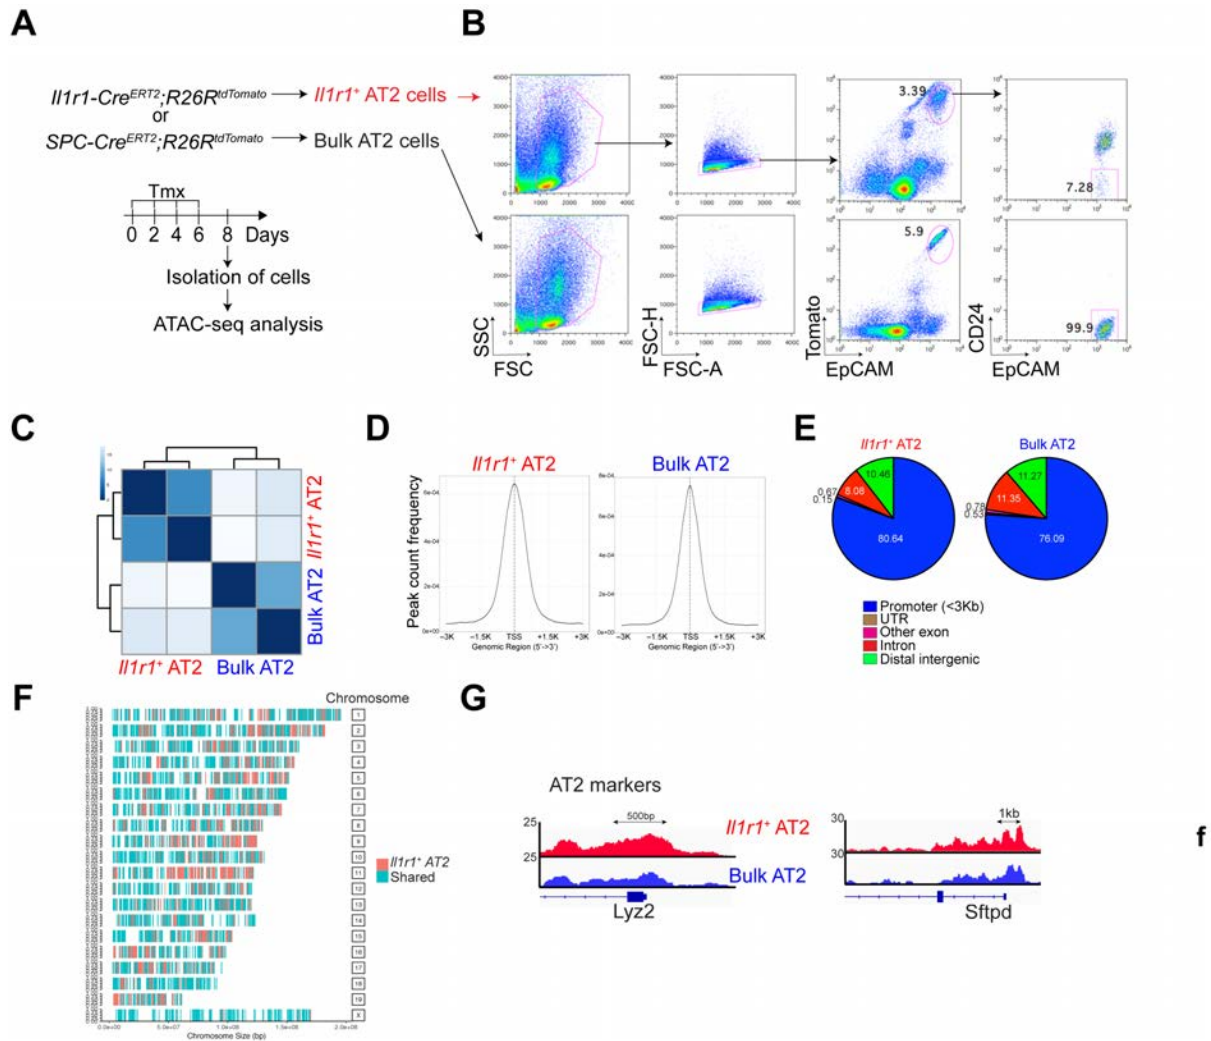

1  
 2 **Figure S10, related to Fig. 6. ATAC-seq analysis reveals distinct differences in open**  
 3 **chromatin structure in *Illr1*<sup>+</sup>AT2 cells versus bulk AT2 cells.**  
 4 **(A, B)** Experiment design **(A)** and sorting strategy by flow cytometry **(B)** for isolating  
 5 *Illr1*<sup>+</sup>AT2 or bulk AT2 cells from *Illr1-Cre*<sup>ERT2</sup>;R26R<sup>tdTomato</sup> or *SPC-Cre*<sup>ERT2</sup>;R26R<sup>tdTomato</sup>  
 6 mice, respectively.  
 7 **(C)** Heat map of poisson distances between samples on the original count matrix.  
 8 **(D)** Density plots depicting enrichment of ATAC-seq signals at TSSs ± 3 kb.  
 9 **(E)** Distribution of ATAC-seq peaks within defined genomic regions of predicted mRNAs.  
 10 UTR, untranslated regions.  
 11 **(F)** Genome-wide profiling of ATAC-seq peaks in *Illr1*<sup>+</sup>AT2 and bulk AT2 cells.  
 12 **(G)** Snapshots of peaks enriched in shared genes *Lyz2* and *Sftpd*. Arrows denote direction of  
 13 transcription.

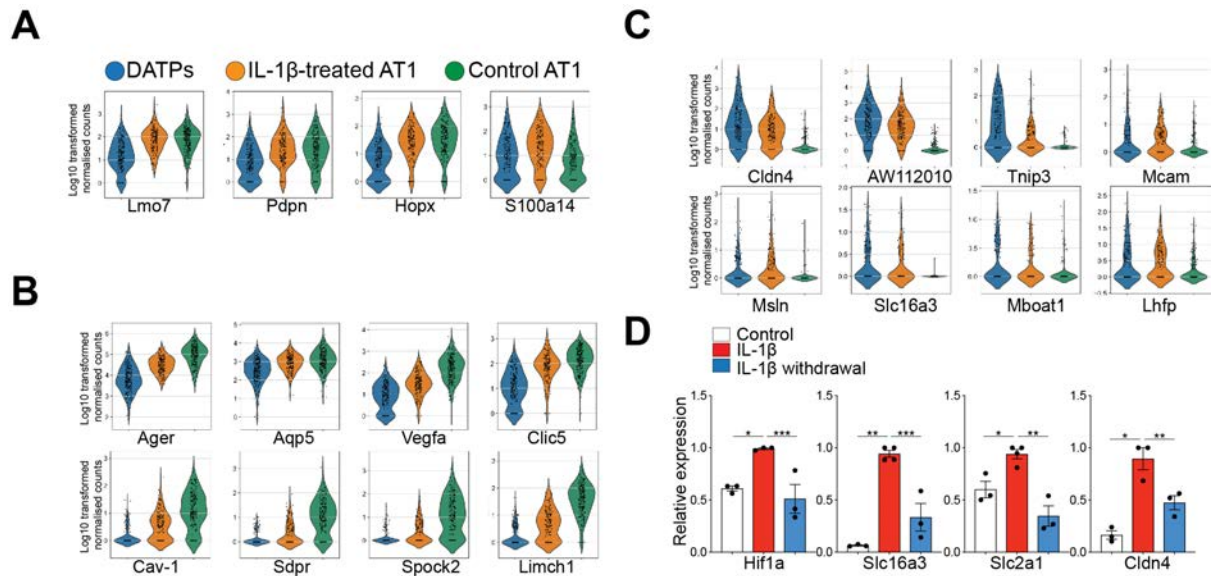

1  
2 **Figure S11, related to Fig. 7, A-E. Sustained IL-1 $\beta$  prohibits mature AT1 differentiation**  
3 **by blocking the progression of DATPs into AT1 lineage.**

4 (A-C) Violin plots showing the log-transformed ( $\log_{10}(\text{TPM}+1)$ ), normalized expression levels  
5 of early AT1 (A), late AT1 (B), and DATP (C) marker genes in DATPs, control or IL-1 $\beta$ -  
6 treated AT1 cells revealed by scRNA-seq analysis of organoids.

7 (D) qPCR analysis of *Cldn4* and *Hif1a*-dependent genes that are involved in the glycolysis  
8 pathway after withdrawal of IL-1 $\beta$  in AT2 organoids. Each individual dot represents one  
9 experiment and data are presented as mean  $\pm$  SEM. \* $p < 0.5$ , \*\* $p < 0.01$ , \*\*\* $p < 0.001$ .

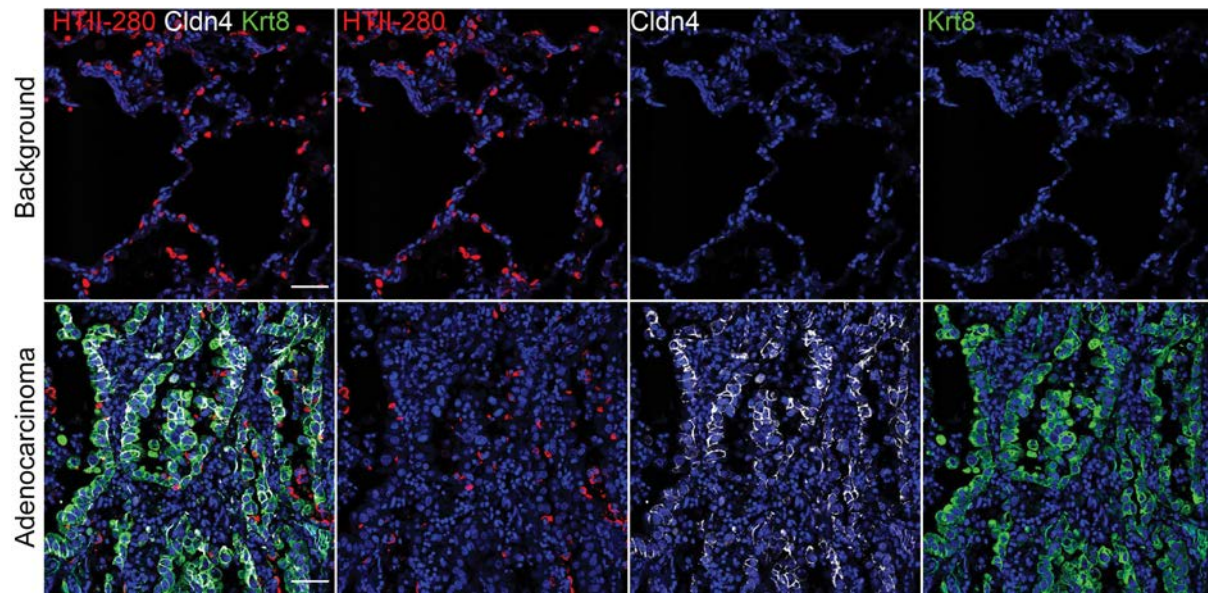

1

2 **Figure S12, related to Fig. 7, F-H. DATPs-like population is aberrantly accumulated in**  
3 **the lung from adenocarcinoma patients.**

4 Representative IF images of KRT8<sup>+</sup>CLDN4<sup>+</sup> cells in the lung from adenocarcinoma patients  
5 (n=3). HTII-280 (red), CLDN4 (white), KRT8 (green) and DAPI (blue). Background region  
6 (top) in the lung tissue of the same patient was used for control. Scale bar, 50  $\mu$ m.
